# Supplementary material for: Analysis of the bereavement effect after the death of a spouse in the Amish: a population-based retrospective cohort study
Source: PubMed Central journal article supplement — BMJ Open. 2014 Jan 15;4(1):e003670. doi: 10.1136/bmjopen-2013-003670 (PMC3902313; doi:10.1136/bmjopen-2013-003670), 2014-01-15
Supplement: bmjopen-2013-003670.draft_revisions.pdf [file bmjopen-2013-003670.draft_revisions.pdf]

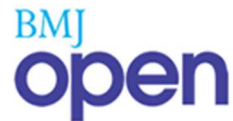

## Analysis of the Bereavement Effect After the Death of a Spouse in the Amish

|                                 |                                                                                                                                                                                                                                                                                                                                                                                                                                                                                                                                                                                                                                                                                                                                                                                                                                                                                                                                                                                                                      |
|---------------------------------|----------------------------------------------------------------------------------------------------------------------------------------------------------------------------------------------------------------------------------------------------------------------------------------------------------------------------------------------------------------------------------------------------------------------------------------------------------------------------------------------------------------------------------------------------------------------------------------------------------------------------------------------------------------------------------------------------------------------------------------------------------------------------------------------------------------------------------------------------------------------------------------------------------------------------------------------------------------------------------------------------------------------|
| Journal:                        | <i>BMJ Open</i>                                                                                                                                                                                                                                                                                                                                                                                                                                                                                                                                                                                                                                                                                                                                                                                                                                                                                                                                                                                                      |
| Manuscript ID:                  | bmjopen-2013-003670                                                                                                                                                                                                                                                                                                                                                                                                                                                                                                                                                                                                                                                                                                                                                                                                                                                                                                                                                                                                  |
| Article Type:                   | Research                                                                                                                                                                                                                                                                                                                                                                                                                                                                                                                                                                                                                                                                                                                                                                                                                                                                                                                                                                                                             |
| Date Submitted by the Author:   | 26-Jul-2013                                                                                                                                                                                                                                                                                                                                                                                                                                                                                                                                                                                                                                                                                                                                                                                                                                                                                                                                                                                                          |
| Complete List of Authors:       | Seifter, Ari; University of Maryland School of Medicine, Department of Medicine and Program for Personalized and Genomic Medicine<br>Singh, Sarabdeep; National Institutes of Health, NCBI/NLM<br>McArdle, Patrick; University of Maryland School of Medicine, Department of Medicine and Program for Personalized and Genomic Medicine<br>Ryan, Kathleen; University of Maryland School of Medicine, Department of Medicine and Program for Personalized and Genomic Medicine<br>Shuldiner, Alan; University of Maryland School of Medicine, Department of Medicine and Program for Personalized and Genomic Medicine; Veterans Administration Medical Center, Geriatric Research and Education Clinical Center<br>Mitchell, Braxton; University of Maryland School of Medicine, Department of Medicine and Program for Personalized and Genomic Medicine; Veterans Administration Medical Center, Geriatric Research and Education Clinical Center<br>Schaffer, Alejandro; National Institutes of Health, NCBI/NLM |
| <b>Primary Subject Heading</b>: | Epidemiology                                                                                                                                                                                                                                                                                                                                                                                                                                                                                                                                                                                                                                                                                                                                                                                                                                                                                                                                                                                                         |
| Secondary Subject Heading:      | Geriatric medicine, Public health, Sociology                                                                                                                                                                                                                                                                                                                                                                                                                                                                                                                                                                                                                                                                                                                                                                                                                                                                                                                                                                         |
| Keywords:                       | EPIDEMIOLOGY, GERIATRIC MEDICINE, MENTAL HEALTH, PUBLIC HEALTH                                                                                                                                                                                                                                                                                                                                                                                                                                                                                                                                                                                                                                                                                                                                                                                                                                                                                                                                                       |
|                                 |                                                                                                                                                                                                                                                                                                                                                                                                                                                                                                                                                                                                                                                                                                                                                                                                                                                                                                                                                                                                                      |

SCHOLARONE™  
Manuscripts

# Analysis of the Bereavement Effect After the Death of a Spouse in the Amish

Ari Seifter<sup>1a</sup>, Sarabdeep Singh<sup>2a</sup>, Patrick F. McArdle<sup>1</sup>, Kathleen A. Ryan<sup>1</sup>, Alan R. Shuldiner<sup>1,3</sup>, Braxton D. Mitchell<sup>1,3</sup>, Alejandro A. Schäffer<sup>2\*</sup>

<sup>1</sup>Department of Medicine and Program for Personalized and Genomic Medicine, University of Maryland School of Medicine, Baltimore, MD

<sup>2</sup>National Center for Biotechnology Information, National Library of Medicine, National Institutes of Health, DHHS, Bethesda, MD

<sup>3</sup> Geriatric Research and Education Clinical Center, Veterans Administration Medical Center, Baltimore, MD

<sup>a</sup> These authors contributed equally and should be considered aequo loco.

\*To whom correspondence should be addressed at:

Bldg. 38A, Room 6S608

NCBI/NIH

8600 Rockville Pike

Bethesda, MD 20894

e-mail: schaffer@helix.nih.gov

**Author-suggested Keywords:** bereavement effect, Amish, remarriage, social support, Cox proportional hazards, time-dependent covariate

Word Counts:

Abstract: 239

Introduction through Discussion: 2,988.

**ABSTRACT**

**Objective** This study investigates the association between bereavement and the mortality of a surviving spouse among Amish couples. We hypothesized that the bereavement effect would be relatively small in the Amish due to the unusually cohesive social structure of the Amish that might attenuate the loss of spousal support.

**Design** Population-based cohort study

**Setting** United States of America

**Participants** 15,611 Amish couples born during 1725-1925 located in Pennsylvania, Ohio, and Indiana. All the participants are deceased.

**Outcome measure** Hazard ratios of couples with respect to gender, age at widowhood, remarriage, number of surviving children, and time since bereavement.

**Results** We observed hazard ratios for widowhood ranging from 1.06-1.26 over the study period (nearly all differences significant at  $p < 0.05$ ). Mortality risks tended to be higher in men than in women and in younger compared to older bereaved spouses. There were significantly increased mortality risks in both widows and widowers who did not remarry. We observed a higher number of surviving children to be associated with increased mortality in both widows and widowers. Mortality risk following bereavement was higher in the first 6 months among both men and women.

**Conclusions** We conclude that bereavement effects remain apparent even in this

1  
2  
3 socially cohesive Amish community. Remarriage is associated with a significant  
4  
5 decrease in the mortality risk among widowed individuals. Contrary to results  
6  
7  
8 from previous studies, an increase in the number of surviving children was  
9  
10 associated with decreased survival rate.  
11  
12  
13  
14  
15  
16  
17  
18  
19  
20  
21  
22  
23  
24  
25  
26  
27  
28  
29  
30  
31  
32  
33  
34  
35  
36  
37  
38  
39  
40  
41  
42  
43  
44  
45  
46  
47  
48  
49  
50  
51  
52  
53  
54  
55  
56  
57  
58  
59  
60

For peer review only

## ARTICLE SUMMARY

### Article focus

- The focus of this article is to evaluate the relationship between bereavement and social support in the Amish population.
- We evaluated the association of surviving spouse gender, age at widowhood, remarriage, number of surviving children, and time since bereavement on the bereavement effect using Cox proportional hazard models.

### Key messages

- This study shows that strong social support is not sufficient to decrease the mortality risks of the bereaved individuals and therefore the support provided by the spouse is irreplaceable.
- Remarriage significantly decreases the mortality risk for both males and females.

### Strengths and limitations of this study

- Due to the availability of a large and uncensored dataset, our hazard ratio estimates are mostly significant with narrow confidence intervals.
- Due to the availability of remarriage status of the surviving spouses, we could reproduce and quantify the decreased bereavement effect associated with remarriage.

1  
2  
3  
4  
5  
6  
7  
8  
9  
10  
11  
12  
13  
14  
15  
16  
17  
18  
19  
20  
21  
22  
23  
24  
25  
26  
27  
28  
29  
30  
31  
32  
33  
34  
35  
36  
37  
38  
39  
40  
41  
42  
43  
44  
45  
46  
47  
48  
49  
50  
51  
52  
53  
54  
55  
56  
57  
58  
59  
60

- Due to the unavailability of data on causes of death, it was not possible to determine the relationship between differential measures of social support and certain causes of death.

For peer review only

## INTRODUCTION

It has been consistently established that widowed individuals exhibit increased mortality compared to married individuals.<sup>1-4</sup> This excess mortality risk, referred to as the “bereavement effect,” is strongest in the first few years following widowhood, among men who outlive their wives, and among younger widows/widowers.<sup>2 5</sup> Factors proposed to explain this phenomenon include: the acute grief and stress of bereavement; shared environmental risk factors between spouses; marital selection; economic hardship; and loss of social support.<sup>6 7</sup>

These influences are difficult to isolate and independently assess. Several studies have shown that larger social network size and greater level of social support are generally associated with lower rates of mortality and morbidity.<sup>4</sup> In a study based on the Utah Population Database, mortality risk among widowers decreased with membership in the Church of Latter Day Saints (LDS, a.k.a. Mormon Church) and with increasing numbers of children. These factors were interpreted as proxies for social support.<sup>8</sup> Additionally, a study in Washington County, Maryland, indicated that living alone was a risk factor for increased mortality in widowed populations.<sup>9</sup> Loss of social support following the death of a spouse is generally more profound in widowers than in widows, but there is currently no empirical evidence that this difference mediates the higher mortality consistently observed among widowed husbands compared to widowed wives.<sup>10</sup>

11

To gain a different perspective on potential influences of social support on

1  
2  
3 bereavement, we assessed the bereavement effect in an Amish population, whose  
4 culture is characterized by its core beliefs in community and social cohesion.  
5  
6 Examples of the strong degree of social support within the Amish include  
7  
8 community-managed health insurance and community ties through membership in  
9  
10 the church, and the sharing of ultraconservative cultural beliefs and lifestyles.<sup>12</sup>  
11  
12 We reasoned that the high level of social support in the Amish population might  
13  
14 mitigate the bereavement effect. Previous studies used covariates such as  
15  
16 education (homogeneous in the Amish),<sup>12</sup> health habits, remarriage, church visits,  
17  
18 neighborhood interaction, and household size to study the relationship between  
19  
20 bereavement and social support.<sup>4 8 13</sup>  
21  
22  
23  
24  
25  
26

27 We estimated bereavement effects in widows and widowers separately, and  
28  
29 further assessed mortality risks as a function of age at widowhood and time since  
30  
31 bereavement.<sup>2 8</sup> We used Cox proportional hazard (CPH) models to analyze the  
32  
33 association of bereavement and mortality of widowed husbands and wives. We  
34  
35 considered remarriage and number of surviving children as additional potential  
36  
37 modifiers of the bereavement effect.  
38  
39  
40  
41  
42

## 43 MATERIAL AND METHODS

### 44 Data source

45  
46 The Anabaptist Genealogy Database (AGDB) version 5 was used to study the  
47  
48 effect of bereavement on the Amish population.<sup>14 15</sup> The AGDB is a  
49  
50 computerized genealogy database of Amish and some Mennonite populations, last  
51  
52  
53  
54



1  
2  
3 updated in 2010. The AGDB contains information for 539,822 Amish individuals  
4 and 136,213 Amish couples. This database includes information about the family  
5 relationships and the birth, marriage, and death dates of children of Amish  
6 individuals from North America, mostly located in Pennsylvania, Ohio, and  
7 Indiana.  
8  
9

10  
11  
12  
13  
14  
15 Amish people rarely give birth out of wedlock, and a vast majority of the  
16 mating samples we used are documented as marriages in the three original sources  
17 from which AGDB is derived. However, there is less availability of marriage  
18 dates than birth dates; we did not wish to exclude couples with missing marriage  
19 dates. For this study, we included couples in which both spouses met four  
20 conditions: (1) they were born prior to January 1, 1926; (2) their birth and  
21 death dates were recorded; (3) they were in their first marriage; and (4) they did  
22 not die on the same day. Constraint (4) excludes couples who may have died from  
23 a shared disaster (e.g., accident). A total of 15,611 couples met the inclusion  
24 criteria. The oldest person included was born on February 14, 1725, and the  
25 youngest on December 31, 1925.  
26  
27  
28  
29  
30  
31  
32  
33  
34  
35  
36  
37  
38  
39

40  
41 Our data set included 15,611 couples with information on their date of birth,  
42 date of death, number of surviving children, family IDs, and remarriage status  
43 after widowhood. For some analyses, these couples were first partitioned into  
44 eight cohorts based on the husband's birth year (prior to 1850, 1850-1875, 1876-  
45 1900, and 1901-1925) and sex. For the time since bereavement analyses, we did  
46 not partition into cohorts because the number of widow(er)s who died within 6  
47  
48  
49  
50  
51  
52  
53  
54

1  
2  
3 months after being bereaved is small (N=224). Characteristics of these couples by  
4  
5 husband birth cohort are shown in Table 1.  
6  
7

### 8 9 **Statistical analyses**

10  
11 Similar to several past analyses,<sup>2 8 13 16</sup> we used the Cox Proportional  
12 Hazards (CPH) model to study the association of widowhood and mortality rates  
13 in the surviving spouse, while adjusting for covariates such as education, health  
14 habits, age in years, number of children, and remarriage. In some of our analyses,  
15 we adjusted for remarriage and number of children as covariates.  
16  
17  
18  
19  
20  
21  
22

23 The main covariate, widowhood, was monitored as a time-dependent  
24 covariate, by assigning a value of 1 for each time period the individual was  
25 widowed and 0 otherwise. The remarriage covariate was also a time-dependent  
26 covariate, by assigning a value 1 for the widowed period if the individual  
27 remarried and 0 otherwise. The number of surviving children was a time-  
28 independent covariate and divided into categories, as follows: 0=number of  
29 surviving children is  $\leq 2$ , 1=number of surviving children is between 3 and 6, and  
30 2=number of surviving children is  $> 6$ .  
31  
32  
33  
34  
35  
36  
37  
38  
39  
40  
41

42 Survival analyses were performed using the R programming environment.<sup>17</sup>  
43 All estimates and confidence intervals were obtained using the `coxph` function  
44 available in the `survival` package.  
45  
46  
47  
48

### 49 **Representation of survival data for CPH analysis**

50 We show below examples of how we represented the survival data for CPH  
51 analysis using a time modeling approach. To represent the survival data columns, the  
52  
53  
54

1  
2  
3  
4  
5  
6  
7  
8  
9  
10  
11  
12  
13  
14  
15  
16  
17  
18  
19  
20  
21  
22  
23  
24  
25  
26  
27  
28  
29  
30  
31  
32  
33  
34  
35  
36  
37  
38  
39  
40  
41  
42  
43  
44  
45  
46  
47  
48  
49  
50  
51  
52  
53  
54  
55  
56  
57  
58  
59  
60

standard approach is to convert the couple's demographic information, date of death, date of birth, remarriage and number of surviving children into columns representing **start** time, **stop** time, **event** status, and all of the included covariates (widowhood, remarriage and number of surviving children).<sup>18 19</sup> Here (**start**, **stop**] is an interval of risk, open on the left and closed on the right; the **event** column is set to 1 if the subject had an event (death) at time **stop** and is 0 otherwise. To illustrate the subtleties, we consider a hypothetical example of three wives (ID1, ID2 and ID3) from the cohort 1850-1875.

- *ID*1: born on 01/01/1860; widowed on 01/01/1907 at age 47; got remarried; number of surviving children = 3 and eventually died on 01/01/1923 at age 63.
- *ID*2: born on 09/01/1870; widowed on 09/01/1930 at age 60; never got remarried; number of surviving children = 6 and died on 09/01/1955 at age 85.
- *ID*3: born on 03/01/1871; never widowed and never remarried; number of surviving children = 4 and died on 04/01/1930 at age 59.

The data used for the CPH considering widowhood as a single time-dependent covariate is presented in Table 2a. The following model was used to estimate the association between widowhood and mortality.

$$h(t) = h_0(t) \exp[\beta W]$$

This model can be run with additional covariates and results that adjust for the ability to remarry and the number of surviving children are presented.

### **Timing of widowhood**

The above model considers widowhood as a single time-dependent covariate, evaluating the association between mortality and being widowed. One can further ask if that association varies over the life course by considering the impact of age at widowhood on mortality. We addressed this issue following the approach of Mineau et al. by adding terms for age at widowhood into the model as covariates (<45, 45-54, 55-64, 65-74 and >75) to allow the hazard ratio (HR) to vary according to age at widowhood (see Table 2b).<sup>8</sup> These terms were included in the model as time-dependent dummy variables, created to represent the widowhood experience of each individual across the 5 age windows spanning the individual's age:  $W_{<45}$ ,  $W_{45-54}$ ,  $W_{55-64}$ ,  $W_{65-74}$ , and  $W_{75+}$ . Further, we also addressed the impact of remarriage and number of surviving children on mortality of widowed individuals.

The following model can be used to estimate the association between each of the five dummy variables and mortality:

$$h(t) = h_0(t) \exp[\sum \beta_j W_j + \beta_6 R + \beta_7 C] \text{ with } j = 1, \dots, 5$$

where  $W_1, \dots, W_5$  dummy variables are associated with  $W_{<45}$ ,  $W_{45-54}$ ,  $W_{55-64}$ ,  $W_{65-74}$ ,  $W_{75+}$  columns provided in the Table 2b.

### **Time since bereavement**

1  
2  
3  
4  
5  
6  
7  
8  
9  
10  
11  
12  
13  
14  
15  
16  
17  
18  
19  
20  
21  
22  
23  
24  
25  
26  
27  
28  
29  
30  
31  
32  
33  
34  
35  
36  
37  
38  
39  
40  
41  
42  
43  
44  
45  
46  
47  
48  
49  
50  
51  
52  
53  
54  
55  
56  
57  
58  
59  
60

Next, we evaluated the association between mortality and time since bereavement or widowhood. We followed the approach of Schaefer et al. by considering the following time since bereavement ranges: 0-6 months, 7-12 months, 13-24 months, 25-36 months, 37-48 months, 49-60 months and > 60 months.<sup>2</sup> This approach allowed us to estimate HR according to time since bereavement (see Table 2c). The columns TSB<sub>0-6</sub>, TSB<sub>7-12</sub>, ... in Table 2c are time dependent covariates that change with the survival time associated with widowed husbands and wives. We did not account for remarriage in this analysis because of missing remarriage dates.

The following model was used to study the association between mortality and time since bereavement:

$$h(t) = h_0(t) \exp[\sum \beta_j W_j] \text{ with } j = 1, \dots, 7$$

where  $W_1, \dots, W_7$  dummy variables are associated with the TSB<sub>0-6</sub>, TSB<sub>7-12</sub>, TSB<sub>13-24</sub>, TSB<sub>25-36</sub>, TSB<sub>37-48</sub>, TSB<sub>49-60</sub> and TSB<sub>>60</sub> columns provided in the Table 2c.

## RESULTS

We initially partitioned the 15,611 couples from AGDB into four cohorts ranging in size from 3,210 (husband birth year 1850-1875) to 4,466 (husband birth year 1876-1900). Wives were more likely to die after their husbands in all cohorts, although in the three earliest cohorts (prior to 1850, 1850-1875, and

1  
2  
3 1876-1900), husbands had a higher mean age at death than their wives. The  
4  
5 average age differences between the husbands and wives for all cohorts are  
6  
7 shown in Table 1. The number of remarried wives was far smaller than the  
8  
9 number of remarried husbands (n = 1,943 widowed husbands vs 613 widowed  
10  
11 wives). The number and proportion of remarried husbands and wives were  
12  
13 increased in the more contemporary cohorts (see Table 1). In contrast to other  
14  
15 populations from the 19<sup>th</sup> and early 20<sup>th</sup> centuries,<sup>4</sup> the majority of widowed  
16  
17 husbands did not remarry, making it interesting to study the effect of remarriage  
18  
19 in the Amish population.  
20  
21  
22  
23

### 24 **Hazard Ratios**

25  
26 The overall hazard ratios (HR), and their 95% confidence intervals (CIs),  
27  
28 associated with widowhood are displayed in Figure 1 according to birth cohort.  
29  
30 These hazard ratios were estimated using the CPH model and design provided in  
31  
32 Table 2a. As expected, widowhood was associated with increased mortality for  
33  
34 both husbands and wives following the death of spouse, with HRs ranging  
35  
36 from 1.06 to 1.26 (all HRs significantly greater than 1 except for widowed  
37  
38 husbands in cohort 1850-1875). The impact of widowhood was  
39  
40 disproportionately greater on surviving husbands than on surviving wives in the  
41  
42 pre-1850 and 1876-1900 cohorts, although there was little difference in mortality  
43  
44 between widowed husbands vs wives in the 1850-1875 and 1901-1925 cohorts.  
45  
46 There was no clear trend showing that the hazard ratios changed across cohorts  
47  
48 in either surviving husbands or wives. Since no clear differences were observed  
49  
50  
51  
52  
53  
54  
55

1  
2  
3 between birth cohorts, all birth cohorts were combined to estimate the association  
4  
5 between age at widowhood and mortality.  
6  
7

8 Figure 2 shows the hazard ratios (and 95% CIs) for the model in which age at  
9  
10 widowhood is accounted for (design model in Table 2b). These results reveal  
11  
12 markedly higher bereavement effects in each age at widowhood group compared  
13  
14 to the results shown in Figure 1, consistent with the notion that the bereavement  
15  
16 effect may be diminished over time and most pronounced in the years proximal to  
17  
18 the death of the spouse.<sup>2 5 20 21</sup> In nearly all age at widowhood categories, the  
19  
20 bereavement effect is stronger in widowed husbands than in widowed wives.  
21  
22  
23

24 Number of surviving children ( $> 6$  vs  $\leq 2$ ) was included as a covariate in the  
25  
26 models whose results are shown in Figure 2. In general, there was a very weak  
27  
28 association between number of surviving children and mortality in widowed  
29  
30 husbands and widowed wives. Contrary to our expectations and a prior study,<sup>8</sup> in  
31  
32 each case, a higher number of surviving children was associated with higher  
33  
34 mortality in the widowed husband/wife. Further, the results in Figure 2 show that  
35  
36 the effect of bereavement decreases if the widowed individual remarries.  
37  
38  
39

40 Hazard ratios and 95% CIs for the time since bereavement analysis are shown  
41  
42 in Figure 3. These results were obtained using the CPH model and the design  
43  
44 defined in Table 2c. The results show that there is an increase in risk of mortality  
45  
46 for recently widowed husbands and wives, and the hazard decreases with time  
47  
48 since bereavement but remains significantly greater than 1. Further, the hazard is  
49  
50 higher (not significant) in wives vs husbands during the first 12 months following  
51  
52  
53  
54

1  
2  
3 bereavement.  
4

5 Graphical checks of the overall adequacy of the CPH models were  
6 performed.<sup>18 19</sup> Based on the *Cox-Snell residuals* plot, the final model gave a  
7 reasonable fit to the data. Further, the *deviance residual* plots showed that there  
8 were no obvious outliers in the data.  
9  
10  
11  
12  
13

## 14 15 16 17 **DISCUSSION** 18

19  
20  
21 This is the first comprehensive study to evaluate the relationship between  
22 bereavement and social support in the Amish population. This study provides  
23 evidence that Amish widows and widowers have increased mortality risk  
24 compared to married cohort members. Although it is difficult to determine  
25 whether this effect is of equivalent magnitude as that observed in studies of other  
26 populations, the most recent studies of the bereavement effect using the CPH  
27 suggest that our findings are generally consistent with data from other  
28 populations.<sup>4</sup>  
29  
30  
31  
32  
33  
34  
35  
36  
37  
38  
39

40 Several previous studies on American, European, and Middle Eastern  
41 populations have found that mortality is magnified in individuals widowed at a  
42 younger age and that widowers have higher mortality risk than widows.<sup>3 5 8 16 20 22</sup>  
43  
44  
45  
46  
47

48 The LDS study is closest to our study because of the large family sizes and the  
49 population selected as a religious isolate.<sup>8</sup> The effects of bereavement on  
50 mortality with respect to gender and the age at widowhood ranges observed in the  
51  
52  
53  
54



1  
2  
3 Amish are also largely consistent with those observed in the LDS population,<sup>8</sup> and  
4 other populations such as Finland and Israel (Figure 2).<sup>6,22</sup> As expected, widowers  
5 showed higher hazard ratios than widows except for the 1850-1875 cohort (Figure  
6  
7  
8  
9  
10  
11 1).

12  
13 In the present study, the association between bereavement and mortality is  
14 greater in the first 6 months for both men and women (Figure 3), consistent with  
15 previous findings.<sup>2,3,5,20,21,23</sup> The mortality risks in the first 6 months are lower in  
16 the Amish (Figure 3) compared to some studies,<sup>2,5,20,21</sup> but not all studies.<sup>3,23</sup> One  
17 common pattern observed in this and other studies is that the initially high  
18 bereavement effect first decreases but then increases with time since  
19 bereavement.<sup>3,23</sup> We speculate that the increased mortality during the first 6  
20 months might reflect acute effects related to the loss of a spouse, while the  
21 gradual increases in mortality emerging in later life might reflect decreased  
22 survival from aging-related diseases that is unmasked in the absence of spousal  
23 support.  
24  
25  
26  
27  
28  
29  
30  
31  
32  
33  
34  
35  
36  
37

38  
39 Two strengths of our study are that, unlike many of the previously published  
40 studies,<sup>5,13,16,20,21,24</sup> we did not need to incorporate censoring methods into our  
41 analysis because of the near completeness of birth and death dates of the Amish  
42 widows and widowers; and we could study the effect of remarriage because there  
43 were substantial numbers of widowed individuals who did and did not get  
44 remarried (Table 1). Shor et al. noted that the difficulty in studying the effect of  
45 remarriage in populations where all individuals are deceased because “In previous  
46  
47  
48  
49  
50  
51  
52  
53  
54

1  
2  
3 decades, widowed men almost always remarried".<sup>4</sup> As suggested by previous  
4  
5 studies,<sup>8 9</sup> remarriage after the death of a spouse significantly influences the  
6  
7 bereavement effect because it is associated with increased survival of both  
8  
9 widowers and widows across all cohorts and age at widowhood ranges. This  
10  
11 association is likely influenced by the fact that widowers or widows who get  
12  
13 remarried are in sufficiently good physical and mental health to do so. Further,  
14  
15 the survival rate is higher for widowers as compared to widows, possibly  
16  
17 reflecting support in Amish society for males getting remarried.  
18  
19  
20  
21

22  
23 Interestingly, increasing numbers of surviving children at the time of  
24  
25 widowhood did not confer a survival advantage for Amish widows or widowers.  
26  
27 In fact, the hazard ratio was greater than 1.0 for all widowers and widows with  
28  
29 number of surviving children  $> 6$  as compared to  $\leq 2$ . This result was counter to  
30  
31 our hypothesis that children can help provide social support for their parents. The  
32  
33 lack of protective association was similarly observed when the number of  
34  
35 surviving children was considered as a linear or as a categorical variable (data not  
36  
37 shown). This contrasts with data from the Utah Population Database, in which  
38  
39 increasing numbers of children were associated with a decreased hazard ratio.<sup>8</sup>  
40  
41  
42

43  
44 The implication of these findings is that differential familial support  
45  
46 following bereavement does not appear to be the key factor affecting mortality  
47  
48 increases in widowed Amish populations. One potential explanation is that  
49  
50 spouses, as "attachment figures," provide a unique, irreplaceable social support  
51  
52 which must be considered independently from other ancillary support providers,  
53  
54

1  
2  
3 such as children.<sup>25</sup> Data suggesting that relative mortality risk is also elevated in  
4 divorced and never-married populations may support this hypothesis.<sup>3</sup> In addition,  
5 quality of social support has significantly greater effects on well-being than  
6 quantity of support in elderly populations of both sexes.<sup>26</sup>  
7  
8  
9  
10  
11

12 In adults aged 65 and older, lower reported social support has been associated  
13 with decreased life satisfaction and increased depressive symptoms.<sup>27</sup> Family  
14 members and close friends should be especially vigilant during the sensitive acute  
15 period following the loss of a spouse, when relative mortality risk is the highest.  
16  
17  
18  
19  
20  
21

22 A limitation of our data is that causes of death were unavailable. Future  
23 research is needed to determine whether differential measures of social support  
24 may be associated with certain causes of death in widowed populations. Divorce  
25 in the Amish is sufficiently rare that this was not a major potential source of error.  
26  
27  
28  
29  
30  
31

32 Our study results indicate that remarriage plays an important role in  
33 improving the survival rate of widows and widowers in the Amish population.  
34 Contrary to results from previous studies, an increase in the number of surviving  
35 children was associated with a decreased survival rate of widowed individuals.  
36  
37  
38  
39  
40  
41  
42  
43

44 **Contributors** BDM conceived the study. AS and SS did the research and data  
45 analysis, with substantial guidance from PFM, BDM, and AAS. AS and SS  
46 wrote the manuscript, with substantial editing by PFM, BDM, and AAS. AAS  
47 managed the project with assistance from BDM. AAS manages the AGDB project  
48 at the National Institutes of Health and KAR managed the AGDB data at  
49  
50  
51  
52  
53  
54

1  
2  
3 University of Maryland Medical School during the period of this project. ARS  
4 provided resources and advice. All authors proofread and approved the  
5 manuscript.  
6  
7  
8

9  
10 **Funding** This work was supported by research grants R01 HL69313, R01  
11 DK54261, R01 AG1872801, R01 HL088119, R01 AR046838, and U01 HL72515  
12 from the National Institutes of Health. This research was supported in part by the  
13 Intramural Research Program of the National Institutes of Health, NLM and the  
14 Geriatric Research and Education Center, Baltimore Veterans Administration  
15 Medical Center.  
16  
17  
18  
19

20 **Competing interests** None.  
21  
22  
23  
24

25 **Ethics approval** The construction and maintenance of AGDB are covered under  
26 an IRB-approved human subjects protocol at the NIH, Leslie Biesecker, Principal  
27 Investigator.  
28  
29  
30  
31  
32  
33  
34

35 **Provenance and peer review** Not commissioned; externally peer reviewed.  
36  
37  
38  
39

40 **Data sharing statement** Data from the AGDB are available to investigators  
41 (including ARS and various others not participating in this study) who have an  
42 IRB-approved protocol to study the Amish or other Anabaptist groups.  
43 Investigators can request access to AGDB by writing to AAS and to Dr.  
44 Biesecker.  
45  
46  
47  
48  
49  
50

## 51 REFERENCES 52 53 54

1. **Jagger C**, Sutton CJ. Death after marital bereavement—Is the risk increased. *Stat Med*. 1991; **10**:395-404.
2. **Schaefer C**, Quesenberry C, Wi S. Mortality following conjugal bereavement and the effects of a shared environment. *Am J Epidemiol*. 1995; **141**:1142-1152.
3. **Johnson NJ**, Backlund E, Sorlie PD, et al. Marital status and mortality: The national longitudinal mortality study. *Ann Epidemiol*. 2000; **10**:224-238.
4. **Shor E**, Roelfs DJ, Curreli M, et al. Widowhood and mortality: A meta-analysis and meta-regression. *Demography*. 2012; **49**:575-606.
5. **Manor O**, Eisenbach Z. Mortality after spousal loss: Are there socio-demographic differences? *Soc Sci Med*. 2003; **56**:405-413.
6. **Martikainen P**, Valkonen T. Mortality after the death of a spouse: rates and causes of death in a large Finnish cohort. *Am J Public Health*. 1996; **86**:1087-1093.
7. **Espinosa J**, Evans WN. Heightened mortality after the death of a spouse: marriage protection or marriage selection? *J Health Econ*. 2008; **27**:1326-1342.
8. **Mineau G**, Smith K, Bean L. Historical trends of survival among widows and widowers. *Soc Sci Med*. 2002; **54**:245-254.
9. **Helsing KJ**, Szklo M, Comstock GW. Factors associated with mortality after widowhood. *Am J Public Health*. 1981a; **71**:802-809.
10. **Stroebe W**, Stroebe MS, Abakoumkin G. Does differential social support cause sex differences in bereavement outcome? *J Commun Appl Soc Psychol*. 1999; **9**:1-12.

- 1  
2  
3  
4  
5  
6  
7  
8  
9  
10  
11  
12  
13  
14  
15  
16  
17  
18  
19  
20  
21  
22  
23  
24  
25  
26  
27  
28  
29  
30  
31  
32  
33  
34  
35  
36  
37  
38  
39  
40  
41  
42  
43  
44  
45  
46  
47  
48  
49  
50  
51  
52  
53  
54  
55  
56  
57  
58  
59  
60
11. **Stroebe MS**, Stroebe W, Schut H. Gender differences in adjustment to bereavement: an empirical and theoretical review. *Rev Gen Psychol.* 2001; **5**:62-83.
  12. **Hostetler JA**. *Amish society*. 4<sup>th</sup> ed. The Johns Hopkins University Press, MD; 1993.
  13. **Iwasaki M**, Otani T, Sunaga R, et al. Social networks and mortality based on the Komo-Ise Cohort Study in Japan. *Int J Epidemiol.* 2002; **31**:1208-1218.
  14. **Agarwala R**, Biesecker LG., Hopkins KA, et al. Software for constructing and verifying pedigrees within large genealogies and an application to the old order Amish of Lancaster County. *Genome Res.* 1998; **8**:211-221.
  15. **Mitchell BD**, Lee W-J, Tolea M, et al. Living the good life? Mortality and hospital utilization patterns in the Lancaster County Amish. *PLoS ONE.* 2012; **7**:e51560.
  16. **Smith KR**, Zick CD. Risk of mortality following widowhood: Age and sex differences by mode of death. *Soc Biol.* 1996; **43**:59-71.
  17. **R Development Core Team**. *R: A language and environment for statistical computing*. Vienna, Austria: R Foundation for Statistical Computing; 2011. URL <http://www.R-project.org/>
  18. **Therneau TM**, Grambsch PT. *Modeling Survival Data: Extending the Cox Model Statistics for Biology and Health*. New York, NY: Springer; 2000.
  19. **Tableman M**, Kim JS. *Survival Analysis Using S: Analysis of Time- to-Event Data*. 1<sup>st</sup> ed. New York, NY: Texts in Statistical Science, Chapman and Hall/CRC; 2004.

- 1  
2  
3  
4  
5  
6  
7  
8  
9  
10  
11  
12  
13  
14  
15  
16  
17  
18  
19  
20  
21  
22  
23  
24  
25  
26  
27  
28  
29  
30  
31  
32  
33  
34  
35  
36  
37  
38  
39  
40  
41  
42  
43  
44  
45  
46  
47  
48  
49  
50  
51  
52  
53  
54  
55  
56  
57  
58  
59  
60
20. **Lichtenstein P**, Gatz M, Berg S. A twin study of mortality after spousal bereavement. *Psychol Med.* 1998; **28**:635-643.
21. **Mendes De Leon CF**, Kasl SV, Jacobs S. Widowhood and mortality risk in a community sample of the elderly: A prospective study. *J Clin Epidemiol.* 1993; **46**:519-527.
22. **Peritz E**, Bialik O, Groen JJ. Mortality by marital status in the Jewish population of Israel. *J Chronic Dis.* 1967; **20**:823-828.
23. **Hart CL**, Hole DJ, Lawlor DA, et al. Effect of conjugal bereavement on mortality of the bereaved spouse in participants of the Renfrew/Paisley Study. *J Epidemiol Community Health.* 2007; **61**:455-460.
24. **Ikeda A**, Iso H, Toyoshima H, et al. Marital status and mortality among Japanese men and women: The Japan Collaborative Cohort Study. *BMC Public Health.* 2007; **7**:73.
25. **Diamond LM**. Contributions of psychophysiology to research on adult attachment: review and recommendations. *Pers Soc Psychol Rev.* 2001; **5**:276-295.
26. **Antonucci TC**, Akiyama H. An examination of sex differences in social support among older men and women. *Sex Roles.* 1987; **17**:737-749.
27. **Newsom JT**, Schulz R. Social support as a mediator in the relation between functional status and quality of life in older adults. *Psychol Aging.* 1996; **11**:34-44.

1  
2  
3  
4  
5  
6  
7  
8  
9  
10  
11  
12  
13  
14  
15  
16  
17  
18  
19  
20  
21  
22  
23  
24  
25  
26  
27  
28  
29  
30  
31  
32  
33  
34  
35  
36  
37  
38  
39  
40  
41  
42  
43  
44  
45  
46  
47  
48  
49  
50  
51  
52  
53  
54  
55  
56  
57  
58  
59  
60

## FIGURE LEGENDS

Figure 1. Hazard ratios of widowed husbands and wives versus their married counterparts (design provided in Table 2a).

Figure 2. Hazard ratios of widowed husbands and wives versus their married counterparts according to age at widowhood. (design provided in Table 2b).

Figure 3. Hazard ratios of widowed husbands and wives versus their married counterparts according to time since bereavement (months). (design provided in Table 2c).



## TABLES

Table 1: Characteristics of 15,611 spouse pairs according to birth cohort of husband

|                                                 | Cohorts    |            |            |            |
|-------------------------------------------------|------------|------------|------------|------------|
|                                                 | Pre-1850   | 1850-1875  | 1876-1900  | 1901-1925  |
| Number of couples                               | 3711       | 3210       | 4466       | 4224       |
| Number (%) of wives out surviving their husband | 2043(55.0) | 1661(51.7) | 2360(53.0) | 2439(57.7) |
| Number (%) of husbands out surviving their wife | 1668(45.0) | 1549(48.3) | 2106(47.0) | 1785(42.3) |
| Mean husband age at widowhood                   | 63.0       | 59.8       | 62.2       | 67.9       |
| Mean wife age at widowhood                      | 62.0       | 62.8       | 66.5       | 69.6       |
| Mean widowed husband survival in years          | 14.4       | 18.3       | 18.6       | 15.0       |
| Mean widowed wife survival in years             | 15.3       | 16.0       | 17.0       | 15.1       |
| Mean husband age at death                       | 71.1       | 72.0       | 74.6       | 76.2       |
| Mean wife age at death                          | 69.6       | 68.5       | 72.7       | 77.0       |
| Mean age difference husband-wife                | 3.4        | 2.8        | 2.1        | 1.3        |
| Mean number of children                         | 5.4        | 5.3        | 5.3        | 5.8        |
| Number (%) of widowed husbands remarried        | 238(14.2)  | 404(26.0)  | 13(33.8)   | 588(33.0)  |
| Number (%) of widowed wives remarried           | 58(2.8)    | 140(8.4)   | 221(9.4)   | 194(8.0)   |

Table 2a-c. The three tables below illustrate encodings for different CPH designs to test for the bereavement effect, following the general syntax of CPH table designs recommended in (18). See example description in Material and Methods.

Table 2a: Data structure for Cox Proportional Hazard model that does not estimate the effect for different ages, but instead estimates only widowed vs. non-widowed.

| ID | start | stop                 | event | W | R | C |
|----|-------|----------------------|-------|---|---|---|
| 1  | 0     | 47(age at widowhood) | 0     | 0 | 0 | 3 |
| 1  | 47    | 63(age at death)     | 1     | 1 | 1 | 3 |
| 2  | 0     | 60(age at widowhood) | 0     | 0 | 0 | 6 |
| 2  | 60    | 85(age at death)     | 1     | 1 | 0 | 6 |
| 3  | 0     | 59(age at death)     | 1     | 0 | 0 | 4 |

Table 2b: Data structure for Cox Proportional Hazard model that estimates association between widowhood at given ages and mortality.

| ID | start | stop | event | W <sub>&lt;45</sub> | W <sub>45-54</sub> | W <sub>55-64</sub> | W <sub>65-74</sub> | W <sub>75+</sub> | R | C |
|----|-------|------|-------|---------------------|--------------------|--------------------|--------------------|------------------|---|---|
| 1  | 0     | 47   | 0     | 0                   | 0                  | 0                  | 0                  | 0                | 0 | 3 |
| 1  | 47    | 63   | 1     | 0                   | 1                  | 0                  | 0                  | 0                | 1 | 3 |
| 2  | 0     | 60   | 0     | 0                   | 0                  | 0                  | 0                  | 0                | 0 | 6 |
| 2  | 60    | 85   | 1     | 0                   | 0                  | 1                  | 0                  | 0                | 0 | 6 |
| 3  | 0     | 59   | 1     | 0                   | 0                  | 0                  | 0                  | 0                | 0 | 4 |

Table 2c: Data structure for Cox Proportional Hazard model that estimates association between widowhood with respect to time since bereavement and mortality. Start and Stop columns are in years and Time Since Bereavement (TSB) columns are in months.

| ID              | start | stop | event | TSB <sub>0-6</sub> | TSB <sub>7-12</sub> | TSB <sub>13-24</sub> | TSB <sub>25-36</sub> | TSB <sub>37-48</sub> | TSB <sub>49-60</sub> | TSB <sub>&gt;60</sub> |
|-----------------|-------|------|-------|--------------------|---------------------|----------------------|----------------------|----------------------|----------------------|-----------------------|
| ID <sub>1</sub> | 0     | 47   | 0     | 0                  | 0                   | 0                    | 0                    | 0                    | 0                    | 0                     |
| ID <sub>1</sub> | 47    | 47.5 | 0     | 1                  | 0                   | 0                    | 0                    | 0                    | 0                    | 0                     |
| ID <sub>1</sub> | 47.5  | 48   | 0     | 0                  | 1                   | 0                    | 0                    | 0                    | 0                    | 0                     |
| ID <sub>1</sub> | 48    | 49   | 0     | 0                  | 0                   | 1                    | 0                    | 0                    | 0                    | 0                     |
| ID <sub>1</sub> | 49    | 50   | 0     | 0                  | 0                   | 0                    | 1                    | 0                    | 0                    | 0                     |
| ID <sub>1</sub> | 50    | 51   | 0     | 0                  | 0                   | 0                    | 0                    | 1                    | 0                    | 0                     |

|                 |      |      |   |   |   |   |   |   |   |   |
|-----------------|------|------|---|---|---|---|---|---|---|---|
| ID <sub>1</sub> | 51   | 52   | 0 | 0 | 0 | 0 | 0 | 0 | 1 | 0 |
| ID <sub>1</sub> | 52   | 63   | 1 | 0 | 0 | 0 | 0 | 0 | 0 | 1 |
| ID <sub>2</sub> | 0    | 60   | 0 | 0 | 0 | 0 | 0 | 0 | 0 | 0 |
| ID <sub>2</sub> | 60   | 60.5 | 0 | 1 | 0 | 0 | 0 | 0 | 0 | 0 |
| ID <sub>2</sub> | 60.5 | 61   | 0 | 0 | 1 | 0 | 0 | 0 | 0 | 0 |
| ID <sub>2</sub> | 61   | 62   | 0 | 0 | 0 | 1 | 0 | 0 | 0 | 0 |
| ID <sub>2</sub> | 62   | 63   | 0 | 0 | 0 | 0 | 1 | 0 | 0 | 0 |
| ID <sub>2</sub> | 63   | 64   | 0 | 0 | 0 | 0 | 0 | 1 | 0 | 0 |
| ID <sub>2</sub> | 64   | 65   | 0 | 0 | 0 | 0 | 0 | 0 | 1 | 0 |
| ID <sub>2</sub> | 65   | 85   | 1 | 0 | 0 | 0 | 0 | 0 | 0 | 1 |
| ID <sub>3</sub> | 0    | 59   | 1 | 0 | 0 | 0 | 0 | 0 | 0 | 0 |

1  
2  
3  
4  
5  
6  
7  
8  
9  
10  
11  
12  
13  
14  
15  
16  
17  
18  
19  
20  
21  
22  
23  
24  
25  
26  
27  
28  
29  
30  
31  
32  
33  
34  
35  
36  
37  
38  
39  
40  
41  
42  
43  
44  
45  
46  
47  
48  
49  
50  
51  
52  
53  
54  
55  
56  
57  
58  
59  
60

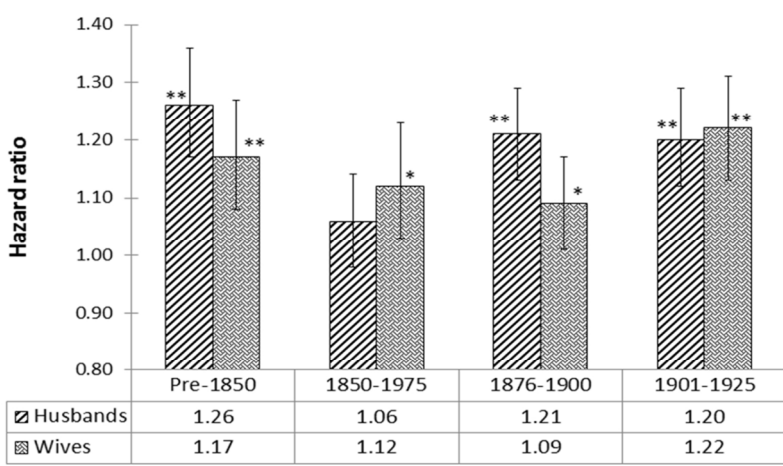

Figure 1. Hazard ratios of widowed husbands and wives versus their married counterparts (design provided in Table 2a).  
173x233mm (300 x 300 DPI)

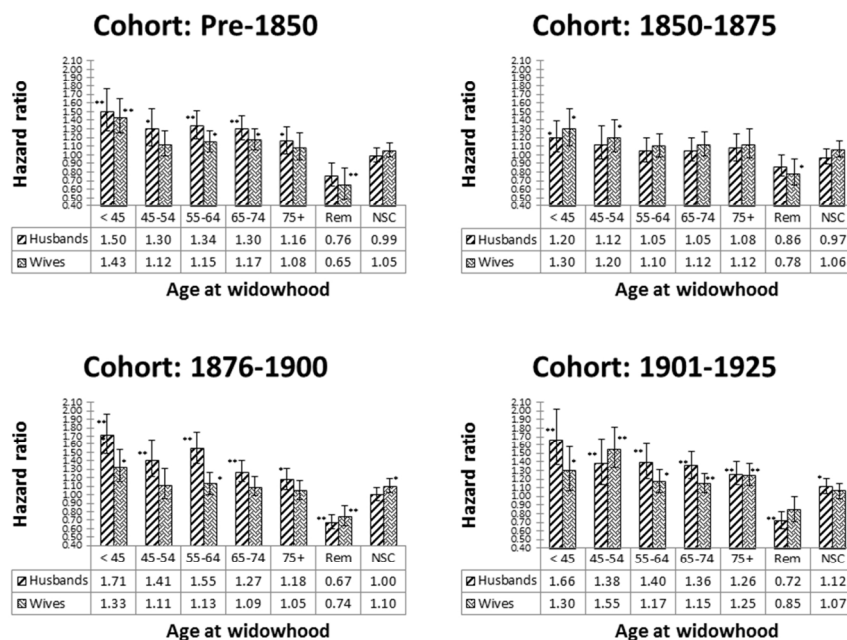

Figure 2. Hazard ratios of widowed husbands and wives versus their married counterparts according to age at widowhood. (design provided in Table 2b).  
173x233mm (300 x 300 DPI)

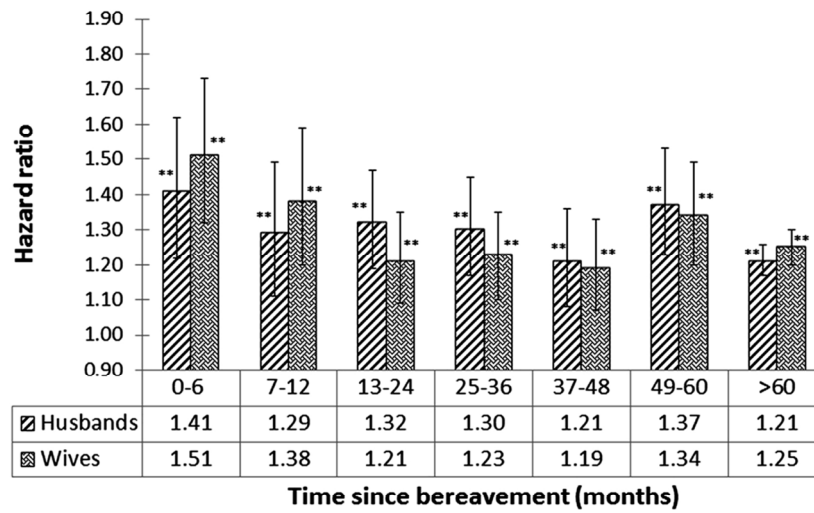

Figure 3. Hazard ratios of widowed husbands and wives versus their married counterparts according to time since bereavement (months). (design provided in Table 2c).  
173x233mm (300 x 300 DPI)

STROBE Statement—Checklist of items that should be included in reports of *cohort studies*

|                           | Item No | Recommendation                                                                                                                                                                                                                                                                                                                                                                                                                                                                                                                                                                                                                                                                                                                                                                                                                                                                                                                                                                                                                                                                                                                                                                                                                                                                                                               |
|---------------------------|---------|------------------------------------------------------------------------------------------------------------------------------------------------------------------------------------------------------------------------------------------------------------------------------------------------------------------------------------------------------------------------------------------------------------------------------------------------------------------------------------------------------------------------------------------------------------------------------------------------------------------------------------------------------------------------------------------------------------------------------------------------------------------------------------------------------------------------------------------------------------------------------------------------------------------------------------------------------------------------------------------------------------------------------------------------------------------------------------------------------------------------------------------------------------------------------------------------------------------------------------------------------------------------------------------------------------------------------|
| <b>Title and abstract</b> | 1       | <p>(a) Indicate the study's design with a commonly used term in the title or the abstract (From Abstract) This study investigates the association between bereavement and the mortality of a surviving spouse among 15,611 Amish couples born during 1725-1925. We evaluated the association of surviving spouse gender, age at widowhood, remarriage, number of surviving children, and time since bereavement on the bereavement effect using the Cox proportional hazard model.</p> <p>(b) Provide in the abstract an informative and balanced summary of what was done and what was found. See Abstract for findings.</p>                                                                                                                                                                                                                                                                                                                                                                                                                                                                                                                                                                                                                                                                                                |
| <b>Introduction</b>       |         |                                                                                                                                                                                                                                                                                                                                                                                                                                                                                                                                                                                                                                                                                                                                                                                                                                                                                                                                                                                                                                                                                                                                                                                                                                                                                                                              |
| Background/rationale      | 2       | <p>Explain the scientific background and rationale for the investigation being reported (From Introduction) It has been consistently established that widowed individuals exhibit increased mortality compared to married individuals.<sup>1-4</sup> This excess mortality risk, referred to as the "bereavement effect," is strongest in the first few years following widowhood, among men who outlive their wives, and among younger widows/widowers.<sup>2-5</sup> Factors proposed to explain this phenomenon include: the acute grief and stress of bereavement; shared environmental risk factors between spouses; marital selection; economic hardship; and loss of social support.<sup>6-7</sup> To gain a different perspective on potential influences of social support on bereavement, we assessed the bereavement effect in an Amish population, whose culture is characterized by its core beliefs in community and social cohesion. Examples of the strong degree of social support within the Amish include community-managed health insurance and community ties through membership in the church, and the sharing of ultraconservative cultural beliefs and lifestyles.<sup>12</sup> We reasoned that the high level of social support in the Amish population might mitigate the bereavement effect.</p> |
| Objectives                | 3       | <p>State specific objectives, including any prespecified hypotheses (From Abstract) We hypothesized that the bereavement effect would be relatively small in the Amish due to the unusually cohesive social structure of the Amish that might attenuate the loss of spousal support. We evaluated the association of surviving spouse gender, age at widowhood, remarriage, number of surviving children, and time since bereavement on the bereavement effect using the Cox proportional hazard model.</p>                                                                                                                                                                                                                                                                                                                                                                                                                                                                                                                                                                                                                                                                                                                                                                                                                  |
| <b>Methods</b>            |         |                                                                                                                                                                                                                                                                                                                                                                                                                                                                                                                                                                                                                                                                                                                                                                                                                                                                                                                                                                                                                                                                                                                                                                                                                                                                                                                              |
| Study design              | 4       | <p>Present key elements of study design early in the paper (From Introduction) We used Cox proportional hazard (CPH) models to analyze the association of bereavement and mortality of widowed husbands and wives. We considered remarriage and number of surviving children as additional potential modifiers of the bereavement effect. (From Material and Methods). The Anabaptist Genealogy Database (AGDB) version 5 was used to study the effect of bereavement of the Amish population.<sup>14-15</sup></p>                                                                                                                                                                                                                                                                                                                                                                                                                                                                                                                                                                                                                                                                                                                                                                                                           |
| Setting                   | 5       | <p>Describe the setting, locations, and relevant dates, including periods of recruitment, exposure, follow-up, and data collection (From Material and Methods) The Anabaptist Genealogy Database (AGDB) version 5 was used to study the effect of bereavement on the Amish population.<sup>14-15</sup> The AGDB is a computerized genealogy database of Amish and some Mennonite populations, last updated in 2010. The AGDB contains information for 539,822 Amish individuals and 136,213 Amish couples. This database includes information about the family relationships and the birth, marriage, and death dates of children of Amish individuals</p>                                                                                                                                                                                                                                                                                                                                                                                                                                                                                                                                                                                                                                                                   |

|                              |    |                                                                                                                                                                                                                                                                                                                                                                                                                                                                                                                                                                                                                                                                                                                                                                                                                                                        |
|------------------------------|----|--------------------------------------------------------------------------------------------------------------------------------------------------------------------------------------------------------------------------------------------------------------------------------------------------------------------------------------------------------------------------------------------------------------------------------------------------------------------------------------------------------------------------------------------------------------------------------------------------------------------------------------------------------------------------------------------------------------------------------------------------------------------------------------------------------------------------------------------------------|
|                              |    | from North America, mostly located in Pennsylvania, Ohio, and Indiana.                                                                                                                                                                                                                                                                                                                                                                                                                                                                                                                                                                                                                                                                                                                                                                                 |
| Participants                 | 6  | (a) Give the eligibility criteria, and the sources and methods of selection of participants. Describe methods of follow-up<br>(From Materials and Methods) For this study, we included couples in which both spouses met four conditions: (1) they were born prior to January 1, 1926; (2) their birth and death dates were recorded; (3) they were in their first marriage; and (4) they did not die on the same day. Constraint (4) excludes couples who may have died from a shared disaster (e.g., accident). A total of 15,611 couples met the inclusion criteria. The oldest person included was born on February 14, 1725, and the youngest on December 31, 1925. Our data set included 15,611 couples with information on their date of birth, date of death, number of surviving children, family IDs, and remarriage status after widowhood. |
|                              |    | (b) For matched studies, give matching criteria and number of exposed and unexposed<br>This is not a matched study                                                                                                                                                                                                                                                                                                                                                                                                                                                                                                                                                                                                                                                                                                                                     |
| Variables                    | 7  | Clearly define all outcomes, exposures, predictors, potential confounders, and effect modifiers. Give diagnostic criteria, if applicable<br>See Material and Methods, especially Table 2.                                                                                                                                                                                                                                                                                                                                                                                                                                                                                                                                                                                                                                                              |
| Data sources/<br>measurement | 8* | For each variable of interest, give sources of data and details of methods of assessment (measurement). Describe comparability of assessment methods if there is more than one group<br>(From Material and Methods) The Anabaptist Genealogy Database (AGDB) version 5 was used to study the effect of bereavement on the Amish population. <sup>14 15</sup> The AGDB is a computerized genealogy database of Amish and some Mennonite populations, last updated in 2010. The AGDB contains information for 539,822 Amish individuals and 136,213 Amish couples. This database includes information about the family relationships and the birth, marriage, and death dates of children of Amish individuals from North America, mostly located in Pennsylvania, Ohio, and Indiana.                                                                    |
| Bias                         | 9  | Describe any efforts to address potential sources of bias<br>We excluded couples who died on the same day. The data are not censored.                                                                                                                                                                                                                                                                                                                                                                                                                                                                                                                                                                                                                                                                                                                  |
| Study size                   | 10 | Explain how the study size was arrived at<br>All couples in AGDB meeting the criteria described in item 5.                                                                                                                                                                                                                                                                                                                                                                                                                                                                                                                                                                                                                                                                                                                                             |
| Quantitative<br>variables    | 11 | Explain how quantitative variables were handled in the analyses. If applicable, describe which groupings were chosen and why<br>(From Material and Methods) For some analyses, these couples were first partitioned into eight cohorts based on the husband's birth year (prior to 1850, 1850-1875, 1876-1900, and 1901-1925) and sex. For the time since bereavement analyses, we did not partition into cohorts because the number of widow(er)s who died within 6 months after being bereaved is small (N=224). Characteristics of these couples by husband birth cohort are shown in Table 1.                                                                                                                                                                                                                                                      |
| Statistical methods          | 12 | (a) Describe all statistical methods, including those used to control for confounding<br>See Material and Methods, especially Table 2.                                                                                                                                                                                                                                                                                                                                                                                                                                                                                                                                                                                                                                                                                                                 |
|                              |    | (b) Describe any methods used to examine subgroups and interactions<br>(From Material and Methods) For some analyses, these couples were first partitioned into eight cohorts based on the husband's birth year (prior to 1850, 1850-1875, 1876-1900, and 1901-1925) and sex.                                                                                                                                                                                                                                                                                                                                                                                                                                                                                                                                                                          |



|                  |     |     |                                                                                                                                                                                                                                                                                            |
|------------------|-----|-----|--------------------------------------------------------------------------------------------------------------------------------------------------------------------------------------------------------------------------------------------------------------------------------------------|
|                  |     | (c) | Explain how missing data were addressed<br>Couples with missing dates were excluded.                                                                                                                                                                                                       |
|                  |     | (d) | If applicable, explain how loss to follow-up was addressed<br>Not applicable.                                                                                                                                                                                                              |
|                  |     | (e) | Describe any sensitivity analyses<br>Not applicable                                                                                                                                                                                                                                        |
| <b>Results</b>   |     |     |                                                                                                                                                                                                                                                                                            |
| Participants     | 13* | (a) | Report numbers of individuals at each stage of study—eg numbers potentially eligible, examined for eligibility, confirmed eligible, included in the study, completing follow-up, and analysed<br>See Table 1                                                                               |
|                  |     | (b) | Give reasons for non-participation at each stage<br>Not applicable                                                                                                                                                                                                                         |
|                  |     | (c) | Consider use of a flow diagram<br>We preferred to describe the analysis designs in Table 2.                                                                                                                                                                                                |
| Descriptive data | 14* | (a) | Give characteristics of study participants (eg demographic, clinical, social) and information on exposures and potential confounders<br>See Table 1.                                                                                                                                       |
|                  |     | (b) | Indicate number of participants with missing data for each variable of interest<br>Couples with missing dates were excluded.                                                                                                                                                               |
|                  |     | (c) | Summarise follow-up time (eg, average and total amount)<br>This is a retrospective study; All participants are deceased.                                                                                                                                                                   |
| Outcome data     | 15* |     | Report numbers of outcome events or summary measures over time<br>See Table 1.                                                                                                                                                                                                             |
| Main results     | 16  | (a) | Give unadjusted estimates and, if applicable, confounder-adjusted estimates and their precision (eg, 95% confidence interval). Make clear which confounders were adjusted for and why they were included<br>See Figures 1-3 and text of Results. Figures do show 95% confidence intervals. |
|                  |     | (b) | Report category boundaries when continuous variables were categorized<br>See Table 2.                                                                                                                                                                                                      |
|                  |     | (c) | If relevant, consider translating estimates of relative risk into absolute risk for a meaningful time period<br>Not applicable.                                                                                                                                                            |
| Other analyses   | 17  |     | Report other analyses done—eg analyses of subgroups and interactions, and sensitivity analyses<br>See Results text.                                                                                                                                                                        |

| <b>Discussion</b> |    |                                                                                                                                                                                                                                                                                                                                                                                                                                                                                                                                                                                                                                                                                                                                                                                                                                                                                                                                                                                                                                                                                                                                                                                                                                                                                                                                                                                  |
|-------------------|----|----------------------------------------------------------------------------------------------------------------------------------------------------------------------------------------------------------------------------------------------------------------------------------------------------------------------------------------------------------------------------------------------------------------------------------------------------------------------------------------------------------------------------------------------------------------------------------------------------------------------------------------------------------------------------------------------------------------------------------------------------------------------------------------------------------------------------------------------------------------------------------------------------------------------------------------------------------------------------------------------------------------------------------------------------------------------------------------------------------------------------------------------------------------------------------------------------------------------------------------------------------------------------------------------------------------------------------------------------------------------------------|
| Key results       | 18 | <p>Summarise key results with reference to study objectives</p> <p>(From Discussion) This study provides evidence that Amish widows and widowers have increased mortality risk compared to married cohort members. Although it is difficult to determine whether this effect is of equivalent magnitude as that observed in studies of other populations, the most recent studies of the bereavement effect using the CPH suggest that our findings are generally consistent with data from other populations.<sup>4</sup></p> <p>Interestingly, increasing numbers of surviving children at the time of widowhood did not confer a survival advantage for Amish widows or widowers. In fact, the hazard ratio was greater than 1.0 for all widowers and widows with number of surviving children &gt; 6 as compared to <math>\leq 2</math>. This result was counter to our hypothesis that children can help provide social support for their parents.</p>                                                                                                                                                                                                                                                                                                                                                                                                                      |
| Limitations       | 19 | <p>Discuss limitations of the study, taking into account sources of potential bias or imprecision. Discuss both direction and magnitude of any potential bias</p> <p>(From Discussion) A limitation of our data is that causes of death were unavailable. Future research is needed to determine whether differential measures of social support may be associated with certain causes of death in widowed populations. Divorce in the Amish is sufficiently rare that this was not a major potential source of error.</p>                                                                                                                                                                                                                                                                                                                                                                                                                                                                                                                                                                                                                                                                                                                                                                                                                                                       |
| Interpretation    | 20 | <p>Give a cautious overall interpretation of results considering objectives, limitations, multiplicity of analyses, results from similar studies, and other relevant evidence</p> <p>(From Discussion) The effects of bereavement on mortality with respect to gender and the age at widowhood ranges observed in the Amish are also largely consistent with those observed in the LDS population,<sup>8</sup> and other populations such as Finland and Israel (Figure 2).<sup>6,22</sup> As expected, widowers showed higher hazard ratios than widows except for the 1850-1875 cohort (Figure 1).</p> <p>Two strengths of our study are that, unlike many of the previously published studies,<sup>5,13,16,20,21,24</sup> we did not need to incorporate censoring methods into our analysis because of the near completeness of birth and death dates of the Amish widows and widowers; and we could study the effect of remarriage because there were substantial numbers of widowed individuals who did and did not get remarried (Table 1).</p> <p>Our study results indicate that remarriage plays an important role in improving the survival rate of widows and widowers in the Amish population. Contrary to results from previous studies, an increase in the number of surviving children was associated with a decreased survival rate of widowed individuals.</p> |
| Generalisability  | 21 | <p>Discuss the generalisability (external validity) of the study results</p> <p>(From Discussion) One common pattern observed in this and other studies is that the initially high bereavement effect first decreases but then increases with time since bereavement.<sup>3,23</sup> We speculate that the increased mortality during the first 6 months might reflect acute effects related to the loss of a spouse, while the gradual increases in mortality emerging in later life might reflect decreased survival from aging-related diseases that is unmasked in the absence of spousal support.</p> <p>As suggested by previous studies,<sup>8,9</sup> remarriage after the death of a spouse significantly influences the bereavement effect because it is associated with increased survival of both widowers and widows across all cohorts and age at widowhood ranges. This association is likely influenced by the fact that widowers or widows who get remarried are in sufficiently good physical and mental health to do so. Further, the survival rate is higher for widowers as compared to widows, possibly reflecting support in Amish society for males getting remarried.</p>                                                                                                                                                                               |

1 Our study results indicate that remarriage plays an important role in improving the  
2 survival rate of widows and widowers in the Amish population.  
3

---

**Other information**

---

4  
5 Funding 22 Give the source of funding and the role of the funders for the present study and, if  
6 applicable, for the original study on which the present article is based  
7 (From Acknowledgments) This work was supported by research grants R01 HL69313,  
8 R01 DK54261, R01 AG1872801, R01 HL088119, R01 AR046838, and U01 HL72515  
9 from the National Institutes of Health. This research was supported in part by the  
10 Intramural Research Program of the National Institutes of Health, NLM and the  
11 Geriatric Research and Education Center, Baltimore Veterans Administration Medical  
12 Center. These funders had no role in the study itself.  
13  
14

---

15  
16 \*Give information separately for exposed and unexposed groups.  
17

18 **Note:** An Explanation and Elaboration article discusses each checklist item and gives methodological background and  
19 published examples of transparent reporting. The STROBE checklist is best used in conjunction with this article (freely  
20 available on the Web sites of PLoS Medicine at <http://www.plosmedicine.org/>, Annals of Internal Medicine at  
21 <http://www.annals.org/>, and Epidemiology at <http://www.epidem.com/>). Information on the STROBE Initiative is  
22 available at <http://www.strobe-statement.org>.  
23  
24  
25  
26  
27  
28  
29  
30  
31  
32  
33  
34  
35  
36  
37  
38  
39  
40  
41  
42  
43  
44  
45  
46  
47  
48  
49  
50  
51  
52  
53  
54  
55  
56  
57  
58  
59  
60



## Analysis of the Bereavement Effect After the Death of a Spouse in the Amish

|                                 |                                                                                                                                                                                                                                                                                                                                                                                                                                                                                                                                                                                                                                                                                                                                                                                                                                                                                                                                                                                                                      |
|---------------------------------|----------------------------------------------------------------------------------------------------------------------------------------------------------------------------------------------------------------------------------------------------------------------------------------------------------------------------------------------------------------------------------------------------------------------------------------------------------------------------------------------------------------------------------------------------------------------------------------------------------------------------------------------------------------------------------------------------------------------------------------------------------------------------------------------------------------------------------------------------------------------------------------------------------------------------------------------------------------------------------------------------------------------|
| Journal:                        | <i>BMJ Open</i>                                                                                                                                                                                                                                                                                                                                                                                                                                                                                                                                                                                                                                                                                                                                                                                                                                                                                                                                                                                                      |
| Manuscript ID:                  | bmjopen-2013-003670.R1                                                                                                                                                                                                                                                                                                                                                                                                                                                                                                                                                                                                                                                                                                                                                                                                                                                                                                                                                                                               |
| Article Type:                   | Research                                                                                                                                                                                                                                                                                                                                                                                                                                                                                                                                                                                                                                                                                                                                                                                                                                                                                                                                                                                                             |
| Date Submitted by the Author:   | 10-Sep-2013                                                                                                                                                                                                                                                                                                                                                                                                                                                                                                                                                                                                                                                                                                                                                                                                                                                                                                                                                                                                          |
| Complete List of Authors:       | Seifter, Ari; University of Maryland School of Medicine, Department of Medicine and Program for Personalized and Genomic Medicine<br>Singh, Sarabdeep; National Institutes of Health, NCBI/NLM<br>McArdle, Patrick; University of Maryland School of Medicine, Department of Medicine and Program for Personalized and Genomic Medicine<br>Ryan, Kathleen; University of Maryland School of Medicine, Department of Medicine and Program for Personalized and Genomic Medicine<br>Shuldiner, Alan; University of Maryland School of Medicine, Department of Medicine and Program for Personalized and Genomic Medicine; Veterans Administration Medical Center, Geriatric Research and Education Clinical Center<br>Mitchell, Braxton; University of Maryland School of Medicine, Department of Medicine and Program for Personalized and Genomic Medicine; Veterans Administration Medical Center, Geriatric Research and Education Clinical Center<br>Schaffer, Alejandro; National Institutes of Health, NCBI/NLM |
| <b>Primary Subject Heading</b>: | Epidemiology                                                                                                                                                                                                                                                                                                                                                                                                                                                                                                                                                                                                                                                                                                                                                                                                                                                                                                                                                                                                         |
| Secondary Subject Heading:      | Geriatric medicine, Public health, Sociology                                                                                                                                                                                                                                                                                                                                                                                                                                                                                                                                                                                                                                                                                                                                                                                                                                                                                                                                                                         |
| Keywords:                       | EPIDEMIOLOGY, GERIATRIC MEDICINE, MENTAL HEALTH, PUBLIC HEALTH                                                                                                                                                                                                                                                                                                                                                                                                                                                                                                                                                                                                                                                                                                                                                                                                                                                                                                                                                       |
|                                 |                                                                                                                                                                                                                                                                                                                                                                                                                                                                                                                                                                                                                                                                                                                                                                                                                                                                                                                                                                                                                      |

SCHOLARONE™  
Manuscripts

# Analysis of the Bereavement Effect After the Death of a Spouse in the Amish

Ari Seifter<sup>1a</sup>, Sarabdeep Singh<sup>2a</sup>, Patrick F. McArdle<sup>1</sup>, Kathleen A. Ryan<sup>1</sup>, Alan R. Shuldiner<sup>1,3</sup>, Braxton D. Mitchell<sup>1,3</sup>, Alejandro A. Schäffer<sup>2\*</sup>

<sup>1</sup>Department of Medicine and Program for Personalized and Genomic Medicine, University of Maryland School of Medicine, Baltimore, MD

<sup>2</sup>National Center for Biotechnology Information, National Library of Medicine, National Institutes of Health, DHHS, Bethesda, MD

<sup>3</sup> Geriatric Research and Education Clinical Center, Veterans Administration Medical Center, Baltimore, MD

<sup>a</sup> These authors contributed equally and should be considered aequo loco.

\*To whom correspondence should be addressed at:

Bldg. 38A, Room 6S608

NCBI/NIH

8600 Rockville Pike

Bethesda, MD 20894

e-mail: schaffer@helix.nih.gov

**Author-suggested Keywords:** bereavement effect, Amish, remarriage, social support, Cox proportional hazards, time-dependent covariate

Word Counts:

Abstract: 248

Introduction through Discussion: 3,377.

**ABSTRACT**

**Objective** This study investigates the association between bereavement and the mortality of a surviving spouse among Amish couples. We hypothesized that the bereavement effect would be relatively small in the Amish due to the unusually cohesive social structure of the Amish that might attenuate the loss of spousal support.

**Design** Population-based cohort study

**Setting** United States of America

**Participants** 15,611 Amish couples born during 1725-1925 located in Pennsylvania, Ohio, and Indiana. All the participants are deceased.

**Outcome measure** The survival time is 'age'; event is 'death'. Hazard ratios of widowed individuals with respect to gender, age at widowhood, remarriage, number of surviving children, and time since bereavement.

**Results** We observed hazard ratios for widowhood ranging from 1.06-1.26 over the study period (nearly all differences significant at  $p < 0.05$ ). Mortality risks tended to be higher in men than in women and in younger compared to older bereaved spouses. There were significantly increased mortality risks in both widows and widowers who did not remarry. We observed a higher number of surviving children to be associated with increased mortality in both widows and widowers. Mortality risk following bereavement was higher in the first 6 months among both men and women.

**Conclusions** We conclude that bereavement effects remain apparent even in this

1  
2  
3 socially cohesive Amish community. Remarriage is associated with a significant  
4  
5 decrease in the mortality risk among widowed individuals. Contrary to results  
6  
7  
8 from previous studies, an increase in the number of surviving children was  
9  
10 associated with decreased survival rate.  
11  
12  
13  
14  
15  
16  
17  
18  
19  
20  
21  
22  
23  
24  
25  
26  
27  
28  
29  
30  
31  
32  
33  
34  
35  
36  
37  
38  
39  
40  
41  
42  
43  
44  
45  
46  
47  
48  
49  
50  
51  
52  
53  
54  
55  
56  
57  
58  
59  
60

For peer review only

## ARTICLE SUMMARY

### Article focus

- The focus of this article is to evaluate the relationship between bereavement and social support in the Amish population.
- We evaluated the association of surviving spouse gender, age at widowhood, remarriage, number of surviving children, and time since bereavement on the bereavement effect using Cox proportional hazard models.

### Key messages

- This study shows that strong social support is not sufficient to decrease the mortality risks of the bereaved individuals and therefore the support provided by the spouse is irreplaceable.
- Remarriage significantly decreases the mortality risk for both males and females.

### Strengths and limitations of this study

- Due to the availability of a large and uncensored dataset, our hazard ratio estimates are mostly significant with narrow confidence intervals.
- Due to the availability of remarriage status of the surviving spouses, we could reproduce and quantify the decreased bereavement effect associated with remarriage.



1  
2  
3  
4  
5  
6  
7  
8  
9  
10  
11  
12  
13  
14  
15  
16  
17  
18  
19  
20  
21  
22  
23  
24  
25  
26  
27  
28  
29  
30  
31  
32  
33  
34  
35  
36  
37  
38  
39  
40  
41  
42  
43  
44  
45  
46  
47  
48  
49  
50  
51  
52  
53  
54  
55  
56  
57  
58  
59  
60

- Due to the unavailability of data on causes of death, it was not possible to determine the relationship between differential measures of social support and certain causes of death.

For peer review only

## INTRODUCTION

It has been consistently established that widowed individuals exhibit increased mortality compared to married individuals.<sup>1-4</sup> This excess mortality risk, referred to as the “bereavement effect,” is strongest in the first few years following widowhood, among men who outlive their wives, and among younger widows/widowers.<sup>2 5</sup> Factors proposed to explain this phenomenon include: the acute grief and stress of bereavement; shared environmental risk factors between spouses; marital selection; economic hardship; and loss of social support.<sup>6 7</sup>

These influences are difficult to isolate and independently assess. Several studies have shown that larger social network size and greater level of social support are generally associated with lower rates of mortality and morbidity.<sup>4</sup> In a study based on the Utah Population Database, mortality risk among widowers decreased with membership in the Church of Latter Day Saints (LDS, a.k.a. Mormon Church) and with increasing numbers of children. These factors were interpreted as proxies for social support.<sup>8</sup> Additionally, a study in Washington County, Maryland, indicated that living alone was a risk factor for increased mortality in widowed populations.<sup>9</sup> Loss of social support following the death of a spouse is generally more profound in widowers than in widows, but there is currently no empirical evidence that this difference mediates the higher mortality consistently observed among widowed husbands compared to widowed wives.<sup>10</sup>

11

The Amish maintain a cultural identity distinct from mainstream American

1  
2  
3 culture that is characterized by their traditional dress, a plain lifestyle, and non-  
4 adoption of modern technology (e.g., electricity, cars, telephones), German  
5 dialect, separate school system, and ultra-conservative Anabaptist religious  
6 practices. A central tenet of Amish culture throughout their history in the USA  
7 has been social cohesiveness with emphasis on family and community. Members  
8 of this tight-knit society have extraordinary social support from cradle to grave,  
9 including community-managed health insurance and support during times of need.  
10 Elderly parents are taken care of by their children and neighbors; they do not use  
11 assisted living or nursing homes to care for their elderly.  
12  
13  
14  
15  
16  
17  
18  
19  
20  
21  
22  
23

24 To gain a different perspective on potential influences of social support on  
25 bereavement, we assessed the bereavement effect in an Amish population, whose  
26 culture is characterized by its core beliefs in community and social cohesion.  
27 Examples of the strong degree of social support within the Amish include  
28 community-managed health insurance and community ties through membership in  
29 the church, and the sharing of ultraconservative cultural beliefs and lifestyles.<sup>12</sup>  
30 We reasoned that the high level of social support in the Amish population might  
31 mitigate the bereavement effect. Previous studies used covariates such as  
32 education (homogeneous in the Amish),<sup>12</sup> health habits, remarriage, church visits,  
33 neighborhood interaction, and household size to study the relationship between  
34 bereavement and social support.<sup>4 8 13</sup>  
35  
36  
37  
38  
39  
40  
41  
42  
43  
44  
45  
46  
47  
48  
49

50 We estimated bereavement effects in widows and widowers separately, and  
51 further assessed mortality risks as a function of age at widowhood and time since  
52  
53  
54

1  
2  
3 bereavement.<sup>2 8</sup> We used Cox proportional hazard (CPH) models to analyze the  
4 association of bereavement and mortality of widowed husbands and wives. We  
5 considered remarriage and number of surviving children as additional potential  
6 modifiers of the bereavement effect.  
7  
8  
9  
10  
11

## 12 13 14 15 **MATERIAL AND METHODS**

### 16 17 **Data source**

18  
19 The Anabaptist Genealogy Database (AGDB) version 5 was used to study the  
20 effect of bereavement on the Amish population.<sup>14 15</sup> The AGDB is a  
21 computerized genealogy database of Amish and some Mennonite populations, last  
22 updated in 2010. This database includes information about the family  
23 relationships and the birth, marriage, and death dates of children of Amish  
24 individuals from North America, mostly located in Pennsylvania, Ohio, and  
25 Indiana. The “individual table” of AGDB contains information about 539,822  
26 individuals. The “relationship table” includes information about 136,213 Amish  
27 couples. An individual who is married multiple times participates in multiple  
28 relationship table entries. There are 1,369 relationship entries among the 136,213  
29 entries concerning children for whom one or both biological parents are unknown  
30 (Figure 1).  
31  
32  
33  
34  
35  
36  
37  
38  
39  
40  
41  
42  
43  
44  
45  
46  
47

48 Amish people rarely give birth out of wedlock, and a vast majority of the  
49 mating samples we used are documented as marriages in the three original sources  
50 from which AGDB is derived. However, there is less availability of marriage  
51  
52  
53  
54

1  
2  
3 dates than birth dates; we did not wish to exclude couples with missing marriage  
4  
5 dates. For this study, we included couples in which both spouses met four  
6  
7 conditions: (1) they were born prior to January 1, 1926; (2) their birth and  
8  
9 death dates were recorded; (3) they were in their first marriage; and (4) they did  
10  
11 not die on the same day. Constraint (4) excludes couples who may have died from  
12  
13 a shared disaster (e.g., accident). A total of 15,611 couples met the inclusion  
14  
15 criteria. The oldest person included was born on February 14, 1725, and the  
16  
17 youngest on December 31, 1925. See Figure 1 for how the exclusion criteria were  
18  
19 applied.  
20  
21  
22  
23

24  
25 Our data set included 15,611 couples with information on their date of birth,  
26  
27 date of death, number of surviving children, family IDs, and remarriage status  
28  
29 after widowhood. For some analyses, these couples were first partitioned into  
30  
31 eight cohorts based on the husband's birth year (prior to 1850, 1850-1875, 1876-  
32  
33 1900, and 1901-1925) and sex. For the time since bereavement analyses, we did  
34  
35 not partition into cohorts because the number of widow(er)s who died within 6  
36  
37 months after being bereaved is small (N=224). Characteristics of these couples by  
38  
39 husband birth cohort are shown in Table 1.  
40  
41  
42  
43

#### 44 45 **Statistical analyses**

46  
47 Similar to several past analyses,<sup>2 8 13 16</sup> we used the Cox Proportional  
48  
49 where the response variable or survival time 'age at widowhood or death' and  
50  
51 the event is 'death'. The model is used to study the association of widowhood  
52  
53 and mortality rates in the surviving spouse, while adjusting for covariates such as  
54  
55

1  
2  
3 education, health habits, age in years, number of children, and remarriage. In some  
4  
5 of our analyses, we adjusted for remarriage and number of children as  
6  
7 covariates; we did not adjust for education or health habits. Widows and  
8  
9 widowers were always analyzed separately.  
10  
11

12  
13 The main covariate, widowhood, was monitored as a time-dependent  
14  
15 covariate, by assigning a value of 1 for each time period the individual was  
16  
17 widowed and 0 otherwise. The remarriage covariate was also a time-dependent  
18  
19 covariate, by assigning a value 1 for the widowed period if the individual  
20  
21 remarried and 0 otherwise. The number of surviving children was a time-  
22  
23 independent covariate and divided into categories, as follows: 0=number of  
24  
25 surviving children is  $\leq 2$ , 1=number of surviving children is between 3 and 6, and  
26  
27 2=number of surviving children is  $> 6$ . The categories  $\leq 2$  children, 3-6 children, and  
28  
29  $> 6$  children are separate. These boundaries were chosen to ensure categories that were  
30  
31 roughly balanced in size.  
32  
33  
34  
35

36 Survival analyses were performed using the R programming environment.<sup>17</sup>  
37  
38 All estimates and confidence intervals were obtained using the `coxph` function  
39  
40 available in the `survival` package.  
41  
42

### 43 **Representation of survival data for CPH analysis**

44  
45 We show below examples of how we represented the survival data for CPH  
46  
47 analysis using a time modeling approach. To represent the survival data columns, the  
48  
49 standard approach is to convert the couple's demographic information, date of  
50  
51 death, date of birth, remarriage and number of surviving children into columns  
52  
53  
54

1  
2  
3 representing **start** time, **stop** time, **event** status, and all of the included covariates  
4 (widowhood, remarriage and number of surviving children).<sup>18 19</sup> Here (**start**,  
5  
6 **stop**] is an interval of risk, open on the left and closed on the right; the **event**  
7  
8 column is set to 1 if the subject had an event (death) at time **stop** and is 0  
9  
10 otherwise. To illustrate the subtleties, we consider a hypothetical example of  
11  
12 three wives (ID1, ID2 and ID3) from the cohort 1850-1875.  
13  
14

- 15  
16 • *ID*1: born on 01/01/1860; widowed on 01/01/1907 at age 47; got remarried;  
17  
18 number of surviving children = 3 and eventually died on 01/01/1923 at age 63.  
19  
20
- 21  
22 • *ID*2: born on 09/01/1870; widowed on 09/01/1930 at age 60; never got  
23  
24 remarried; number of surviving children = 6 and died on 09/01/1955 at age 85.  
25  
26
- 27  
28 • *ID*3: born on 03/01/1871; never widowed and never remarried; number of  
29  
30 surviving children = 4 and died on 04/01/1930 at age 59.  
31  
32  
33  
34  
35  
36  
37  
38  
39  
40  
41

42 The data used for the CPH considering widowhood as a single time-  
43  
44 dependent covariate is presented in Table 2a. The following model was used to  
45  
46 estimate the association between widowhood and mortality.  
47

$$48 \quad h(t) = h_0(t) \exp[\beta W]$$

49  
50 This model can be run with additional covariates and results that adjust for the  
51  
52 ability to remarry and the number of surviving children are presented.  
53  
54

### Timing of widowhood

The above model considers widowhood as a single time-dependent covariate, evaluating the association between mortality and being widowed. One can further ask if that association varies over the life course by considering the impact of age at widowhood on mortality. We addressed this issue following the approach of Mineau et al. by adding terms for age at widowhood into the model as covariates (<45, 45-54, 55-64, 65-74 and >75) to allow the hazard ratio (HR) to vary according to age at widowhood (see Table 2b).<sup>8</sup> These terms were included in the model as time-dependent dummy variables, created to represent the widowhood experience of each individual across the 5 age windows spanning the individual's age:  $W_{<45}$ ,  $W_{45-54}$ ,  $W_{55-64}$ ,  $W_{65-74}$ , and  $W_{75+}$ . Further, we also addressed the impact of remarriage and number of surviving children on mortality of widowed individuals.

The following model can be used to estimate the association between each of the five dummy variables and mortality:

$$h(t) = h_0(t) \exp[\sum \beta_j W_j + \beta_6 R + \beta_7 C] \text{ with } j = 1, \dots, 5$$

where  $W_1, \dots, W_5$  dummy variables are associated with  $W_{<45}$ ,  $W_{45-54}$ ,  $W_{55-64}$ ,  $W_{65-74}$ ,  $W_{75+}$  columns provided in the Table 2b.

### Time since bereavement

Next, we evaluated the association between mortality and time since bereavement or widowhood. We followed the approach of Schaefer et al. by considering the



1  
2  
3 following time since bereavement ranges: 0-6 months, 7-12 months, 13-24  
4 months, 25-36 months, 37-48 months, 49-60 months and > 60 months.<sup>2</sup> This  
5 approach allowed us to estimate HR according to time since bereavement (see  
6 Table 2c). The columns TSB<sub>0-6</sub>, TSB<sub>7-12</sub>, ... in Table 2c are time dependent  
7 covariates that change with the survival time associated with widowed husbands  
8 and wives. We did not account for remarriage in this analysis because of missing  
9 remarriage dates.

10  
11  
12  
13  
14  
15  
16  
17  
18  
19  
20 The following model was used to study the association between mortality and  
21 time since bereavement:

$$22 \quad h(t) = h_0(t) \exp[\sum \beta_j W_j] \text{ with } j = 1, \dots, 7$$

23  
24 where  $W_1, \dots, W_7$  dummy variables are associated with the TSB<sub>0-6</sub>, TSB<sub>7-12</sub>,  
25 TSB<sub>13-24</sub>, TSB<sub>25-36</sub>, TSB<sub>37-48</sub>, TSB<sub>49-60</sub> and TSB<sub>>60</sub> columns provided in  
26 the Table 2c.  
27  
28  
29  
30  
31  
32  
33  
34  
35  
36

## 37 RESULTS

38  
39  
40 We initially partitioned the 15,611 couples from AGDB into four cohorts  
41 ranging in size from 3,210 (husband birth year 1850-1875) to 4,466 (husband  
42 birth year 1876-1900). Wives were more likely to die after their husbands in all  
43 cohorts, although in the three earliest cohorts (prior to 1850, 1850-1875, and  
44 1876-1900), husbands had a higher mean age at death than their wives. The  
45 average age differences between the husbands and wives for all cohorts are  
46  
47  
48  
49  
50  
51  
52  
53  
54

1  
2  
3 shown in Table 1. The number of remarried wives was far smaller than the  
4 number of remarried husbands (n = 1,943 widowed husbands vs 613 widowed  
5 wives). The number and proportion of remarried husbands and wives were  
6 increased in the more contemporary cohorts (see Table 1). In contrast to other  
7 populations from the 19<sup>th</sup> and early 20<sup>th</sup> centuries,<sup>4</sup> the majority of widowed  
8 husbands did not remarry, making it interesting to study the effect of remarriage  
9 in the Amish population.  
10  
11  
12  
13  
14  
15  
16  
17  
18

### 19 **Hazard Ratios**

20  
21 The overall hazard ratios (HR), and their 95% confidence intervals (CIs),  
22 associated with widowhood are displayed in Figure 2 according to birth cohort.  
23  
24 These hazard ratios were estimated using the CPH model and design provided in  
25 Table 2a. As expected, widowhood was associated with increased mortality for  
26 both husbands and wives following the death of spouse, with HRs ranging  
27 from 1.06 to 1.26 (all HRs significantly greater than 1 except for widowed  
28 husbands in cohort 1850-1875). The impact of widowhood was  
29 disproportionately greater on surviving husbands than on surviving wives in the  
30 pre-1850 and 1876-1900 cohorts, although there was little difference in mortality  
31 between widowed husbands vs wives in the 1850-1875 and 1901-1925 cohorts.  
32  
33 There was no clear trend showing that the hazard ratios changed across cohorts  
34 in either surviving husbands or wives. Since no clear differences were observed  
35 between birth cohorts, all birth cohorts were combined to estimate the association  
36 between age at widowhood and mortality.  
37  
38  
39  
40  
41  
42  
43  
44  
45  
46  
47  
48  
49  
50  
51  
52  
53  
54

1  
2  
3  
4  
5  
6  
7  
8  
9  
10  
11  
12  
13  
14  
15  
16  
17  
18  
19  
20  
21  
22  
23  
24  
25  
26  
27  
28  
29  
30  
31  
32  
33  
34  
35  
36  
37  
38  
39  
40  
41  
42  
43  
44  
45  
46  
47  
48  
49  
50  
51  
52  
53  
54  
55  
56  
57  
58  
59  
60

Figure 3 shows the hazard ratios (and 95% CIs) for the model in which age at widowhood is accounted for (design model in Table 2b). These results reveal markedly higher bereavement effects in each age at widowhood group compared to the results shown in Figure 2, consistent with the notion that the bereavement effect may be diminished over time and most pronounced in the years proximal to the death of the spouse.<sup>2 5 20 21</sup> In nearly all age at widowhood categories, the bereavement effect is stronger in widowed husbands than in widowed wives.

Number of surviving children ( $> 6$  vs  $\leq 2$ ) was included as a covariate in the models whose results are shown in Figure 3. In general, there was a very weak association between number of surviving children and mortality in widowed husbands and widowed wives. Contrary to our expectations and a prior study,<sup>8</sup> in each case, a higher number of surviving children was associated with higher mortality in the widowed husband/wife. When analyses were repeated without the number of surviving children as a covariate, the estimates of the hazard ratios were essentially unchanged (data not shown). Further, the results in Figure 3 show that the effect of bereavement decreases if the widowed individual remarries.

Hazard ratios and 95% CIs for the time since bereavement analysis are shown in Figure 4. These results were obtained using the CPH model and the design defined in Table 2c. The results show that there is an increase in risk of mortality for recently widowed husbands and wives, and the hazard decreases with time since bereavement but remains significantly greater than 1. Further, the hazard is higher (not significant) in wives vs husbands during the first 12 months following

1  
2  
3 bereavement. To address the issue that many individuals in the 1901-1925 cohort  
4 may still have been alive at the last AGDB update and hence censored, we  
5 performed the analysis for time since bereavement omitting the cohort 1901-1925.  
6  
7  
8 The results show that the hazard ratios provided in Figure 4 have not changed  
9 significantly; for example, for 25-26 months post bereavement the hazard ratios  
10 change from 1.30 and 1.23 for all cohort to 1.25 and 1.17 for the three eldest  
11 cohorts.  
12  
13  
14  
15  
16  
17  
18  
19

20 Graphical checks of the overall adequacy of the CPH models were  
21 performed.<sup>18 19</sup> Based on the *Cox-Snell residuals* plot, the final model gave a  
22 reasonable fit to the data (data not shown). The *deviance residual* plots  
23 revealed no obvious outliers in the data (data not shown). Further, the Wald test  
24 statistic was used to test the fit of the final model,<sup>18</sup> and according to this test  
25 statistic, the final model fits the data reasonably well (Supplementary Tables S1,  
26 S2, and S3).  
27  
28  
29  
30  
31  
32  
33  
34  
35  
36  
37  
38

## 39 DISCUSSION

40  
41  
42 This is the first comprehensive study to evaluate the relationship between  
43 bereavement and social support in the Amish population. This study provides  
44 evidence that Amish widows and widowers have increased mortality risk  
45 compared to married cohort members. Although it is difficult to determine  
46 whether this effect is of equivalent magnitude as that observed in studies of other  
47  
48  
49  
50  
51  
52  
53  
54

1  
2  
3 populations, the most recent studies of the bereavement effect using the CPH  
4 suggest that our findings are generally consistent with data from other  
5  
6 populations.<sup>4</sup>  
7  
8

9  
10 Several previous studies on American, European, and Middle Eastern  
11 populations have found that mortality is magnified in individuals widowed at a  
12 younger age and that widowers have higher mortality risk than widows.<sup>3 5 8 16 20 22</sup>  
13  
14 The LDS study is closest to our study because of the large family sizes and the  
15 population selected as a religious isolate.<sup>8</sup> The effects of bereavement on  
16 mortality with respect to gender and the age at widowhood ranges observed in the  
17 Amish are also largely consistent with those observed in the LDS population,<sup>8</sup> and  
18 other populations such as Finland and Israel (Figure 3).<sup>6 22</sup> As expected, widowers  
19 showed higher hazard ratios than widows except for the 1850-1875 cohort (Figure  
20 2).  
21  
22  
23  
24  
25  
26  
27  
28  
29  
30  
31  
32  
33

34 In the present study, the association between bereavement and mortality is  
35 greater in the first 6 months for both men and women (Figure 4), consistent with  
36 previous findings.<sup>2 3 5 20 21 23</sup> The mortality risks in the first 6 months are lower in  
37 the Amish (Figure 4) compared to some studies,<sup>2 5 20 21</sup> but not all studies.<sup>3 23</sup> One  
38 common pattern observed in this and other studies is that the initially high  
39 bereavement effect first decreases but then increases with time since  
40 bereavement.<sup>3 23</sup> We speculate that the increased mortality during the first 6  
41 months might reflect acute effects related to the loss of a spouse, while the  
42 gradual increases in mortality emerging in later life might reflect decreased  
43  
44  
45  
46  
47  
48  
49  
50  
51  
52  
53  
54

1  
2  
3 survival from aging-related diseases that is unmasked in the absence of spousal  
4 support.  
5  
6

7  
8 Two strengths of our study are that, unlike many of the previously published  
9 studies,<sup>5 13 16 20 21 24</sup> we did not incorporate censoring methods into our analysis  
10 because of the high availability of death dates of the Amish widows and widowers  
11 in the first three cohorts; and we could study the effect of remarriage because  
12 there were substantial numbers of widowed individuals who did and did not get  
13 remarried (Table 1). Shor et al. noted that the difficulty in studying the effect of  
14 remarriage in populations where all individuals are deceased because “In previous  
15 decades, widowed men almost always remarried”.<sup>4</sup> As suggested by previous  
16 studies,<sup>8 9</sup> remarriage after the death of a spouse significantly influences the  
17 bereavement effect because it is associated with increased survival of both  
18 widowers and widows across all cohorts and age at widowhood ranges. This  
19 association is likely influenced by the fact that widowers or widows who get  
20 remarried are in sufficiently good physical and mental health to do so. Further,  
21 the survival rate is higher for widowers as compared to widows, possibly  
22 reflecting support in Amish society for males getting remarried.  
23  
24  
25  
26  
27  
28  
29  
30  
31  
32  
33  
34  
35  
36  
37  
38  
39  
40  
41  
42

43 Interestingly, increasing numbers of surviving children at the time of  
44 widowhood did not confer a survival advantage for Amish widows or widowers.  
45 This result was counter to our hypothesis that children can help provide social  
46 support for their parents. The hazard ratio was greater than 1.0 (but not  
47 significant) for all widowers and widows with number of surviving children > 6  
48  
49  
50  
51  
52  
53  
54

1  
2  
3 as compared to  $\leq 2$ . Spouses in the Amish society may also provide unique  
4 emotional, psychological, and social support to each other which cannot be  
5 provided by their surviving children. The lack of protective association was  
6 similarly observed when the number of surviving children was considered as a  
7 linear or as a categorical variable (data not shown). This contrasts with data from  
8 the Utah Population Database, in which increasing numbers of children were  
9 associated with a decreased hazard ratio.<sup>8</sup>  
10  
11  
12  
13  
14  
15  
16  
17  
18  
19  
20  
21

22 The implication of these findings is that differential familial support  
23 following bereavement does not appear to be the key factor affecting mortality  
24 increases in widowed Amish populations. One potential explanation is that  
25 spouses, as “attachment figures,” provide a unique, irreplaceable social support  
26 which must be considered independently from other ancillary support providers,  
27 such as children.<sup>25</sup> Data suggesting that relative mortality risk is also elevated in  
28 divorced and never-married populations may support this hypothesis.<sup>3</sup> In addition,  
29 quality of social support has significantly greater effects on well-being than  
30 quantity of support in elderly populations of both sexes.<sup>26</sup>  
31  
32  
33  
34  
35  
36  
37  
38  
39  
40  
41  
42  
43

44 In adults aged 65 and older, lower reported social support has been associated  
45 with decreased life satisfaction and increased depressive symptoms.<sup>27</sup> Family  
46 members and close friends should be especially vigilant during the sensitive acute  
47 period following the loss of a spouse, when relative mortality risk is the highest.  
48  
49  
50  
51

52 A limitation of our data is that causes of death were unavailable. Future  
53  
54

1  
2  
3 research is needed to determine whether differential measures of social support  
4 may be associated with certain causes of death in widowed populations. Divorce  
5  
6 in the Amish is sufficiently rare that this was not a major potential source of error.  
7  
8

9  
10 Our study results indicate that remarriage plays an important role in  
11 improving the survival rate of widows and widowers in the Amish population.  
12  
13 Contrary to results from previous studies, an increase in the number of surviving  
14  
15 children was associated with a decreased survival rate of widowed individuals.  
16  
17

18  
19 **Acknowledgments** Thanks to two reviewers for excellent suggestions that led us  
20 to improve the manuscript.  
21  
22

23  
24  
25 **Contributors** BDM conceived the study. AS and SS did the research and data  
26 analysis, with substantial guidance from PFM, BDM, and AAS. AS and SS  
27 wrote the manuscript, with substantial editing by PFM, BDM, and AAS. AAS  
28 managed the project with assistance from BDM. AAS manages the AGDB project  
29 at the National Institutes of Health and KAR managed the AGDB data at  
30 University of Maryland Medical School during the period of this project. ARS  
31 provided resources and advice. All authors proofread and approved the  
32 manuscript.  
33  
34

35  
36  
37 **Funding** This work was supported by research grants R01 HL69313, R01  
38 DK54261, R01 AG1872801, R01 HL088119, R01 AR046838, and U01 HL72515  
39 from the National Institutes of Health. This research was supported in part by the  
40 Intramural Research Program of the National Institutes of Health, NLM and the  
41 Geriatric Research and Education Center, Baltimore Veterans Administration  
42  
43  
44  
45  
46  
47  
48  
49  
50  
51  
52  
53  
54



1  
2  
3 Medical Center.  
4  
5

6 **Competing interests** None.  
7  
8

9  
10 **Ethics approval** The construction and maintenance of AGDB are covered under  
11 an IRB-approved human subjects protocol at the NIH, Leslie Biesecker, Principal  
12 Investigator.  
13  
14

15  
16  
17 **Provenance and peer review** Not commissioned; externally peer reviewed.  
18

19  
20  
21 **Data sharing statement** Data from the AGDB are available to investigators  
22 (including ARS and various others not participating in this study) who have an  
23 IRB-approved protocol to study the Amish or other Anabaptist groups.  
24  
25 Investigators can request access to AGDB by writing to AAS and to Dr.  
26 Biesecker.  
27  
28  
29  
30  
31

## 32 REFERENCES 33

- 34 1. **Jagger C**, Sutton CJ. Death after marital bereavement—Is the risk increased. *Stat*  
35 *Med*. 1991; **10**:395-404.  
36
- 37 2. **Schaefer C**, Quesenberry C, Wi S. Mortality following conjugal bereavement and  
38 the effects of a shared environment. *Am J Epidemiol*. 1995; **141**:1142-1152.  
39
- 40 3. **Johnson NJ**, Backlund E, Sorlie PD, et al. Marital status and mortality: The  
41 national longitudinal mortality study. *Ann Epidemiol*. 2000; **10**:224-238.  
42
- 43 4. **Shor E**, Roelfs DJ, Curreli M, et al. Widowhood and mortality: A meta-analysis  
44 and meta-regression. *Demography*. 2012; **49**:575-606.  
45  
46  
47  
48  
49  
50  
51  
52

- 1  
2  
3  
4  
5  
6  
7  
8  
9  
10  
11  
12  
13  
14  
15  
16  
17  
18  
19  
20  
21  
22  
23  
24  
25  
26  
27  
28  
29  
30  
31  
32  
33  
34  
35  
36  
37  
38  
39  
40  
41  
42  
43  
44  
45  
46  
47  
48  
49  
50  
51  
52  
53  
54  
55  
56  
57  
58  
59  
60
5. **Manor O**, Eisenbach Z. Mortality after spousal loss: Are there socio-demographic differences? *Soc Sci Med.* 2003; **56**:405-413.
6. **Martikainen P**, Valkonen T. Mortality after the death of a spouse: rates and causes of death in a large Finnish cohort. *Am J Public Health.* 1996; **86**:1087-1093.
7. **Espinosa J**, Evans WN. Heightened mortality after the death of a spouse: marriage protection or marriage selection? *J Health Econ.* 2008; **27**:1326-1342.
8. **Mineau G**, Smith K, Bean L. Historical trends of survival among widows and widowers. *Soc Sci Med.* 2002; **54**:245-254.
9. **Helsing KJ**, Szklo M, Comstock GW. Factors associated with mortality after widowhood. *Am J Public Health.* 1981a; **71**:802-809.
10. **Stroebe W**, Stroebe MS, Abakoumkin G. Does differential social support cause sex differences in bereavement outcome? *J Commun Appl Soc Psychol.* 1999; **9**:1-12.
11. **Stroebe MS**, Stroebe W, Schut H. Gender differences in adjustment to bereavement: an empirical and theoretical review. *Rev Gen Psychol.* 2001; **5**:62-83.
12. **Hostetler JA**. *Amish society*. 4<sup>th</sup> ed. The Johns Hopkins University Press, MD; 1993.
13. **Iwasaki M**, Otani T, Sunaga R, et al. Social networks and mortality based on the Komo-Ise Cohort Study in Japan. *Int J Epidemiol.* 2002; **31**:1208-1218.
14. **Agarwala R**, Biesecker LG., Hopkins KA, et al. Software for constructing and

- 1  
2  
3 verifying pedigrees within large genealogies and an application to the old order  
4  
5 Amish of Lancaster County. *Genome Res.* 1998; **8**:211-221.  
6  
7
- 8 15. **Mitchell BD**, Lee W-J, Tolea M, et al. Living the good life? Mortality and  
9  
10 hospital utilization patterns in the Lancaster County Amish. *PLoS ONE.* 2012;  
11  
12 7:e51560.  
13
- 14 16. **Smith KR**, Zick CD. Risk of mortality following widowhood: Age and sex  
15  
16 differences by mode of death. *Soc Biol.* 1996; **43**:59-71.  
17
- 18 17. **R Development Core Team.** R: *A language and environment for statistical*  
19  
20 *computing.* Vienna, Austria: R Foundation for Statistical Computing; 2011.  
21  
22 URL <http://www.R-project.org/>  
23  
24  
25  
26
- 27 18. **Therneau TM**, Grambsch PT. *Modeling Survival Data: Extending the Cox Model*  
28  
29 *Statistics for Biology and Health.* New York, NY: Springer; 2000.  
30  
31
- 32 19. **Tableman M**, Kim JS. *Survival Analysis Using S: Analysis of Time- to-Event Data.*  
33  
34 1<sup>st</sup> ed. New York, NY: Texts in Statistical Science, Chapman and Hall/CRC; 2004.  
35  
36
- 37 20. **Lichtenstein P**, Gatz M, Berg S. A twin study of mortality after spousal bereavement.  
38  
39 *Psychol Med.* 1998; **28**:635-643.  
40
- 41 21. **Mendes De Leon CF**, Kasl SV, Jacobs S. Widowhood and mortality risk in a  
42  
43 community sample of the elderly: A prospective study. *J Clin Epidemiol.* 1993;  
44  
45 **46**:519-527.  
46  
47
- 48 22. **Peritz E**, Bialik O, Groen JJ. Mortality by marital status in the Jewish population  
49  
50 of Israel. *J Chronic Dis.* 1967; **20**:823-828.  
51  
52
- 53 23. **Hart CL**, Hole DJ, Lawlor DA, et al. Effect of conjugal bereavement on mortality  
54  
55

1  
2  
3 of the bereaved spouse in participants of the Renfrew/Paisley Study. *J Epidemiol*  
4  
5 *Community Health*. 2007; **61**:455-460.  
6  
7

8 24. **Ikeda A**, Iso H, Toyoshima H, et al. Marital status and mortality among Japanese  
9 men and women: The Japan Collaborative Cohort Study. *BMC Public Health*.  
10 2007; **7**:73.  
11  
12

13 25. **Diamond LM**. Contributions of psychophysiology to research on adult  
14 attachment: review and recommendations. *Pers Soc Psychol Rev*. 2001; **5**:276-  
15 295.  
16  
17

18 26. **Antonucci TC**, Akiyama H. An examination of sex differences in social support  
19 among older men and women. *Sex Roles*. 1987; **17**:737-749.  
20  
21

22 27. **Newsom JT**, Schulz R. Social support as a mediator in the relation between  
23 functional status and quality of life in older adults. *Psychol Aging*. 1996; **11**:34-  
24 44.  
25  
26  
27  
28  
29  
30  
31  
32  
33  
34  
35  
36  
37  
38  
39  
40  
41  
42  
43  
44  
45  
46  
47  
48  
49  
50  
51  
52  
53  
54  
55  
56  
57  
58  
59  
60

## FIGURE LEGENDS

Figure 1. A flow diagram which represents all the steps performed for filtering 15,611 couples from total 136,213 couples available in AGDB. In the flow diagram, each couple is counted as excluded only once, even if multiple exclusion criteria apply. “Unknown spouse” refers to entries in the AGDB relationship table in which at least one parent is unknown; almost all of these entries are for adopted children for whom at least one of the biological parents is unknown. Because AGDB is used primarily in genetic studies (unlike this study), the distinction between biological and adoptive relationships is stored. “Birth year too late” means that the birth year of the husband is known and is  $> 1925$ . “Dates not recognized by R” are invalid dates such as the 31st of June, which got into AGDB due to errors in the original sources. “Implausible birth or death dates” refers to a few individuals who are shown as married but have lifespans of less than 10 years likely due to typos in the birth year in the original sources.

Figure 2. Hazard ratios of widowed husbands and wives versus their married counterparts (design provided in Table 2a).

Figure 3. Hazard ratios of widowed husbands and wives versus their married counterparts according to age at widowhood. (design provided in Table 2b).

Figure 4. Hazard ratios of widowed husbands and wives versus their married counterparts according to time since bereavement (months). (design provided in Table 2c).

## TABLES

Table 1: Characteristics of 15,611 spouse pairs according to birth cohort of husband

|                                                 | Cohorts    |            |            |            |
|-------------------------------------------------|------------|------------|------------|------------|
|                                                 | Pre-1850   | 1850-1875  | 1876-1900  | 1901-1925  |
| Number of couples                               | 3711       | 3210       | 4466       | 4224       |
| Number (%) of wives out surviving their husband | 2043(55.0) | 1661(51.7) | 2360(53.0) | 2439(57.7) |
| Number (%) of husbands out surviving their wife | 1668(45.0) | 1549(48.3) | 2106(47.0) | 1785(42.3) |
| Mean husband age at widowhood                   | 63.0       | 59.8       | 62.2       | 67.9       |
| Mean wife age at widowhood                      | 62.0       | 62.8       | 66.5       | 69.6       |
| Mean widowed husband survival in years          | 14.4       | 18.3       | 18.6       | 15.0       |
| Mean widowed wife survival in years             | 15.3       | 16.0       | 17.0       | 15.1       |
| Mean husband age at death                       | 71.1       | 72.0       | 74.6       | 76.2       |
| Mean wife age at death                          | 69.6       | 68.5       | 72.7       | 77.0       |
| Mean age difference husband-wife                | 3.4        | 2.8        | 2.1        | 1.3        |
| Mean number of children                         | 5.4        | 5.3        | 5.3        | 5.8        |
| Number (%) of widowed husbands remarried        | 238(14.2)  | 404(26.0)  | 13(33.8)   | 588(33.0)  |
| Number (%) of widowed wives remarried           | 58(2.8)    | 140(8.4)   | 221(9.4)   | 194(8.0)   |

Table 2a-c. The three tables below illustrate encodings for different CPH designs to test for the bereavement effect, following the general syntax of CPH table designs recommended in (18). See example description in Material and Methods.

Table 2a: Data structure for Cox Proportional Hazard model that does not estimate the effect for different ages, but instead estimates only widowed vs. non-widowed.

| ID | start | stop                 | event | W | R | C |
|----|-------|----------------------|-------|---|---|---|
| 1  | 0     | 47(age at widowhood) | 0     | 0 | 0 | 3 |
| 1  | 47    | 63(age at death)     | 1     | 1 | 1 | 3 |
| 2  | 0     | 60(age at widowhood) | 0     | 0 | 0 | 6 |
| 2  | 60    | 85(age at death)     | 1     | 1 | 0 | 6 |
| 3  | 0     | 59(age at death)     | 1     | 0 | 0 | 4 |

Table 2b: Data structure for Cox Proportional Hazard model that estimates association between widowhood at given ages and mortality.

| ID | start | stop | event | W <sub>&lt;45</sub> | W <sub>45-54</sub> | W <sub>55-64</sub> | W <sub>65-74</sub> | W <sub>75+</sub> | R | C |
|----|-------|------|-------|---------------------|--------------------|--------------------|--------------------|------------------|---|---|
| 1  | 0     | 47   | 0     | 0                   | 0                  | 0                  | 0                  | 0                | 0 | 3 |
| 1  | 47    | 63   | 1     | 0                   | 1                  | 0                  | 0                  | 0                | 1 | 3 |
| 2  | 0     | 60   | 0     | 0                   | 0                  | 0                  | 0                  | 0                | 0 | 6 |
| 2  | 60    | 85   | 1     | 0                   | 0                  | 1                  | 0                  | 0                | 0 | 6 |
| 3  | 0     | 59   | 1     | 0                   | 0                  | 0                  | 0                  | 0                | 0 | 4 |

Table 2c: Data structure for Cox Proportional Hazard model that estimates association between widowhood with respect to time since bereavement and mortality. Start and Stop columns are in years and Time Since Bereavement (TSB) columns are in months.

| ID              | start | stop | event | TSB <sub>0-6</sub> | TSB <sub>7-12</sub> | TSB <sub>13-24</sub> | TSB <sub>25-36</sub> | TSB <sub>37-48</sub> | TSB <sub>49-60</sub> | TSB <sub>&gt;60</sub> |
|-----------------|-------|------|-------|--------------------|---------------------|----------------------|----------------------|----------------------|----------------------|-----------------------|
| ID <sub>1</sub> | 0     | 47   | 0     | 0                  | 0                   | 0                    | 0                    | 0                    | 0                    | 0                     |
| ID <sub>1</sub> | 47    | 47.5 | 0     | 1                  | 0                   | 0                    | 0                    | 0                    | 0                    | 0                     |
| ID <sub>1</sub> | 47.5  | 48   | 0     | 0                  | 1                   | 0                    | 0                    | 0                    | 0                    | 0                     |
| ID <sub>1</sub> | 48    | 49   | 0     | 0                  | 0                   | 1                    | 0                    | 0                    | 0                    | 0                     |
| ID <sub>1</sub> | 49    | 50   | 0     | 0                  | 0                   | 0                    | 1                    | 0                    | 0                    | 0                     |
| ID <sub>1</sub> | 50    | 51   | 0     | 0                  | 0                   | 0                    | 0                    | 1                    | 0                    | 0                     |

|                 |      |      |   |   |   |   |   |   |   |   |
|-----------------|------|------|---|---|---|---|---|---|---|---|
| ID <sub>1</sub> | 51   | 52   | 0 | 0 | 0 | 0 | 0 | 0 | 1 | 0 |
| ID <sub>1</sub> | 52   | 63   | 1 | 0 | 0 | 0 | 0 | 0 | 0 | 1 |
| ID <sub>2</sub> | 0    | 60   | 0 | 0 | 0 | 0 | 0 | 0 | 0 | 0 |
| ID <sub>2</sub> | 60   | 60.5 | 0 | 1 | 0 | 0 | 0 | 0 | 0 | 0 |
| ID <sub>2</sub> | 60.5 | 61   | 0 | 0 | 1 | 0 | 0 | 0 | 0 | 0 |
| ID <sub>2</sub> | 61   | 62   | 0 | 0 | 0 | 1 | 0 | 0 | 0 | 0 |
| ID <sub>2</sub> | 62   | 63   | 0 | 0 | 0 | 0 | 1 | 0 | 0 | 0 |
| ID <sub>2</sub> | 63   | 64   | 0 | 0 | 0 | 0 | 0 | 1 | 0 | 0 |
| ID <sub>2</sub> | 64   | 65   | 0 | 0 | 0 | 0 | 0 | 0 | 1 | 0 |
| ID <sub>2</sub> | 65   | 85   | 1 | 0 | 0 | 0 | 0 | 0 | 0 | 1 |
| ID <sub>3</sub> | 0    | 59   | 1 | 0 | 0 | 0 | 0 | 0 | 0 | 0 |



## Analysis of the Bereavement Effect After the Death of a Spouse in the Amish

Ari Seifter<sup>1a</sup>, Sarabdeep Singh<sup>2a</sup>, Patrick F. McArdle<sup>1</sup>, Kathleen A. Ryan<sup>1</sup>, Alan R. Shuldiner<sup>1,3</sup>, Braxton D. Mitchell<sup>1,3</sup>, Alejandro A. Schäffer<sup>2\*</sup>

<sup>1</sup>Department of Medicine and Program for Personalized and Genomic Medicine, University of Maryland School of Medicine, Baltimore, MD

<sup>2</sup>National Center for Biotechnology Information, National Library of Medicine, National Institutes of Health, DHHS, Bethesda, MD

<sup>3</sup> Geriatric Research and Education Clinical Center, Veterans Administration Medical Center, Baltimore, MD

<sup>a</sup> These authors contributed equally and should be considered aequo loco.

\*To whom correspondence should be addressed at:

Bldg. 38A, Room 6S608

NCBI/NIH

8600 Rockville Pike

Bethesda, MD 20894

e-mail: schaffer@helix.nih.gov

**Author-suggested Keywords:** bereavement effect, Amish, remarriage, social support, Cox proportional hazards, time-dependent covariate

Word Counts:

Abstract: [24839](#)

Introduction through Discussion: [3,3772,988](#).

**ABSTRACT**

**Objective** This study investigates the association between bereavement and the mortality of a surviving spouse among Amish couples. We hypothesized that the bereavement effect would be relatively small in the Amish due to the unusually cohesive social structure of the Amish that might attenuate the loss of spousal support.

**Design** Population-based cohort study

**Setting** United States of America

**Participants** 15,611 Amish couples born during 1725-1925 located in Pennsylvania, Ohio, and Indiana. All the participants are deceased.

**Outcome measure** [The survival time is 'age'; event is 'death'](#). Hazard ratios of [widowed individuals](#) with respect to gender, age at widowhood, remarriage, number of surviving children, and time since bereavement.

**Results** We observed hazard ratios for widowhood ranging from 1.06-1.26 over the study period (nearly all differences significant at  $p < 0.05$ ). Mortality risks tended to be higher in men than in women and in younger compared to older bereaved spouses. There were significantly increased mortality risks in both widows and widowers who did not remarry. We observed a higher number of surviving children to be associated with increased mortality in both widows and widowers. Mortality risk following bereavement was higher in the first 6 months among both men and women.

**Conclusions** We conclude that bereavement effects remain apparent even in this

1  
2  
3  
4  
5  
6  
7  
8  
9  
10  
11  
12  
13  
14  
15  
16  
17  
18  
19  
20  
21  
22  
23  
24  
25  
26  
27  
28  
29  
30  
31  
32  
33  
34  
35  
36  
37  
38  
39  
40  
41  
42  
43  
44  
45  
46  
47  
48  
49  
50  
51  
52  
53  
54  
55  
56  
57  
58  
59  
60

socially cohesive Amish community. Remarriage is associated with a significant decrease in the mortality risk among widowed individuals. Contrary to results from previous studies, an increase in the number of surviving children was associated with decreased survival rate.

For peer review only

## ARTICLE SUMMARY

### Article focus

- The focus of this article is to evaluate the relationship between bereavement and social support in the Amish population.
- We evaluated the association of surviving spouse gender, age at widowhood, remarriage, number of surviving children, and time since bereavement on the bereavement effect using Cox proportional hazard models.

### Key messages

- This study shows that strong social support is not sufficient to decrease the mortality risks of the bereaved individuals and therefore the support provided by the spouse is irreplaceable.
- Remarriage significantly decreases the mortality risk for both males and females.

### Strengths and limitations of this study

- Due to the availability of a large and uncensored dataset, our hazard ratio estimates are mostly significant with narrow confidence intervals.
- Due to the availability of remarriage status of the surviving spouses, we could reproduce and quantify the decreased bereavement effect associated with remarriage.

1  
2  
3  
4  
5  
6  
7  
8  
9  
10  
11  
12  
13  
14  
15  
16  
17  
18  
19  
20  
21  
22  
23  
24  
25  
26  
27  
28  
29  
30  
31  
32  
33  
34  
35  
36  
37  
38  
39  
40  
41  
42  
43  
44  
45  
46  
47  
48  
49  
50  
51  
52  
53  
54  
55  
56  
57  
58  
59  
60

- Due to the unavailability of data on causes of death, it was not possible to determine the relationship between differential measures of social support and certain causes of death.

For peer review only

## INTRODUCTION

It has been consistently established that widowed individuals exhibit increased mortality compared to married individuals.<sup>1-4</sup> This excess mortality risk, referred to as the “bereavement effect,” is strongest in the first few years following widowhood, among men who outlive their wives, and among younger widows/widowers.<sup>2-5</sup> Factors proposed to explain this phenomenon include: the acute grief and stress of bereavement; shared environmental risk factors between spouses; marital selection; economic hardship; and loss of social support.<sup>6,7</sup>

These influences are difficult to isolate and independently assess. Several studies have shown that larger social network size and greater level of social support are generally associated with lower rates of mortality and morbidity.<sup>4</sup> In a study based on the Utah Population Database, mortality risk among widowers decreased with membership in the Church of Latter Day Saints (LDS, a.k.a. Mormon Church) and with increasing numbers of children. These factors were interpreted as proxies for social support.<sup>8</sup> Additionally, a study in Washington County, Maryland, indicated that living alone was a risk factor for increased mortality in widowed populations.<sup>9</sup> Loss of social support following the death of a spouse is generally more profound in widowers than in widows, but there is currently no empirical evidence that this difference mediates the higher mortality consistently observed among widowed husbands compared to widowed wives.<sup>10</sup>

11

[The Amish maintain a cultural identity distinct from mainstream American](#)

1  
2  
3  
4  
5  
6  
7  
8  
9 culture that is characterized by their traditional dress, a plain lifestyle, and non-  
10 adoption of modern technology (e.g., electricity, cars, telephones), German  
11 dialect, separate school system, and ultra-conservative Anabaptist religious  
12 practices. A central tenet of Amish culture throughout their history in the USA  
13 has been social cohesiveness with emphasis on family and community. Members  
14 of this tight-knit society have extraordinary social support from cradle to grave,  
15 including community-managed health insurance and support during times of need.  
16 Elderly parents are taken care of by their children and neighbors; they do not use  
17 assisted living or nursing homes to care for their elderly.

18  
19  
20  
21  
22  
23  
24  
25  
26 To gain a different perspective on potential influences of social support on  
27 bereavement, we assessed the bereavement effect in an Amish population, whose  
28 culture is characterized by its core beliefs in community and social cohesion.  
29 Examples of the strong degree of social support within the Amish include  
30 community-managed health insurance and community ties through membership in  
31 the church, and the sharing of ultraconservative cultural beliefs and lifestyles.<sup>12</sup>  
32 We reasoned that the high level of social support in the Amish population might  
33 mitigate the bereavement effect. Previous studies used covariates such as  
34 education (homogeneous in the Amish),<sup>12</sup> health habits, remarriage, church visits,  
35 neighborhood interaction, and household size to study the relationship between  
36 bereavement and social support.<sup>4 8 13</sup>

37  
38  
39  
40  
41  
42  
43  
44  
45  
46 We estimated bereavement effects in widows and widowers separately, and  
47 further assessed mortality risks as a function of age at widowhood and time since  
48  
49  
50

1  
2  
3  
4  
5  
6  
7  
8  
9 bereavement.<sup>2 8</sup> We used Cox proportional hazard (CPH) models to analyze the  
10 association of bereavement and mortality of widowed husbands and wives. We  
11 considered remarriage and number of surviving children as additional potential  
12 modifiers of the bereavement effect.  
13  
14  
15

## 16 17 18 **MATERIAL AND METHODS**

### 19 **Data source**

20  
21 The Anabaptist Genealogy Database (AGDB) version 5 was used to study the  
22 effect of bereavement on the Amish population.<sup>14 15</sup> The AGDB is a  
23 computerized genealogy database of Amish and some Mennonite populations, last  
24 updated in 2010. ~~The AGDB contains information for 539,822 Amish individuals  
25 and 136,213 Amish couples.~~ This database includes information about the family  
26 relationships and the birth, marriage, and death dates of children of Amish  
27 individuals from North America, mostly located in Pennsylvania, Ohio, and  
28 Indiana. The "individual table" of AGDB contains information about 539,822  
29 individuals. The "relationship table" includes information about 136,213 Amish  
30 couples. An individual who is married multiple times participates in multiple  
31 relationship table entries. There are 1,369 relationship entries among the 136,213  
32 entries concerning children for whom one or both biological parents are unknown  
33 (Figure 1).  
34  
35  
36  
37  
38  
39  
40  
41  
42  
43  
44  
45

46 Amish people rarely give birth out of wedlock, and a vast majority of the  
47 mating samples we used are documented as marriages in the three original sources  
48  
49  
50



1  
2  
3  
4  
5  
6  
7  
8  
9 from which AGDB is derived. However, there is less availability of marriage  
10 dates than birth dates; we did not wish to exclude couples with missing marriage  
11 dates. For this study, we included couples in which both spouses met four  
12 conditions: (1) they were born prior to January 1, 1926; (2) their birth and  
13 death dates were recorded; (3) they were in their first marriage; and (4) they did  
14 not die on the same day. Constraint (4) excludes couples who may have died from  
15 a shared disaster (e.g., accident). A total of 15,611 couples met the inclusion  
16 criteria. The oldest person included was born on February 14, 1725, and the  
17 youngest on December 31, 1925. [See Figure 1 for how the exclusion criteria were](#)  
18 [applied.](#)  
19  
20  
21  
22  
23  
24  
25  
26  
27

28 Our data set included 15,611 couples with information on their date of birth,  
29 date of death, number of surviving children, family IDs, and remarriage status  
30 after widowhood. For some analyses, these couples were first partitioned into  
31 eight cohorts based on the husband's birth year (prior to 1850, 1850-1875, 1876-  
32 1900, and 1901-1925) and sex. For the time since bereavement analyses, we did  
33 not partition into cohorts because the number of widow(er)s who died within 6  
34 months after being bereaved is small (N=224). Characteristics of these couples by  
35 husband birth cohort are shown in Table 1.  
36  
37  
38  
39  
40  
41  
42  
43

#### 44 **Statistical analyses**

45 Similar to several past analyses,<sup>2 8 13 16</sup> we used the Cox Proportional  
46 [where the response variable or survival time 'age at widowhood or death' and](#)  
47 [the event is 'death'. The model is used—Hazards \(CPH\) model](#) to study the  
48  
49  
50  
51  
52  
53  
54  
55  
56  
57  
58  
59  
60

1  
2  
3  
4  
5  
6  
7  
8  
9 association of widowhood and mortality rates in the surviving spouse, while  
10 adjusting for covariates such as education, health habits, age in years, number of  
11 children, and remarriage. In some of our analyses, we adjusted for remarriage  
12 and number of children as covariates; [we did not adjust for education or health](#)  
13 [habits. Widows and widowers were always analyzed separately.](#)  
14  
15

16  
17  
18 The main covariate, widowhood, was monitored as a time-dependent  
19 covariate, by assigning a value of 1 for each time period the individual was  
20 widowed and 0 otherwise. The remarriage covariate was also a time-dependent  
21 covariate, by assigning a value 1 for the widowed period if the individual  
22 remarried and 0 otherwise. The number of surviving children was a time-  
23 independent covariate and divided into categories, as follows: 0=number of  
24 surviving children is  $\leq 2$ , 1=number of surviving children is between 3 and 6, and  
25 2=number of surviving children is  $> 6$ . [The categories  \$\leq 2\$  children, 3-6 children, and](#)  
26  [\$> 6\$  children are separate. These boundaries were chosen to ensure categories that were](#)  
27 [roughly balanced in size.](#)  
28  
29

30  
31  
32 Survival analyses were performed using the R programming environment.<sup>17</sup>  
33  
34 All estimates and confidence intervals were obtained using the `coxph` function  
35 available in the `survival` package.  
36

#### 37 38 39 **Representation of survival data for CPH analysis**

40  
41  
42 We show below examples of how we represented the survival data for CPH  
43 analysis using a time modeling approach. To represent the survival data columns, the  
44 standard approach is to convert the couple's demographic information, date of  
45  
46  
47  
48  
49

1  
2  
3  
4  
5  
6  
7  
8  
9 death, date of birth, remarriage and number of surviving children into columns  
10 representing **start** time, **stop** time, **event** status, and all of the included covariates  
11 (widowhood, remarriage and number of surviving children).<sup>18 19</sup> Here (**start**,  
12 **stop**) is an interval of risk, open on the left and closed on the right; the **event**  
13 column is set to 1 if the subject had an event (death) at time **stop** and is 0  
14 otherwise. To illustrate the subtleties, we consider a hypothetical example of  
15 three wives (ID<sub>1</sub>, ID<sub>2</sub> and ID<sub>3</sub>) from the cohort 1850-1875.  
16  
17  
18  
19  
20  
21  
22  
23

24 • ID<sub>1</sub>: born on 01/01/1860; widowed on 01/01/1907 at age 47; got remarried;  
25 number of surviving children = 3 and eventually died on 01/01/1923 at age 63.  
26  
27

28  
29  
30 • ID<sub>2</sub>: born on 09/01/1870; widowed on 09/01/1930 at age 60; never got  
31 remarried; number of surviving children = 6 and died on 09/01/1955 at age 85.  
32  
33

34  
35 • ID<sub>3</sub>: born on 03/01/1871; never widowed and never remarried; number of  
36 surviving children = 4 and died on 04/01/1930 at age 59.  
37  
38  
39

40  
41 The data used for the CPH considering widowhood as a single time-  
42 dependent covariate is presented in Table 2a. The following model was used to  
43 estimate the association between widowhood and mortality.  
44  
45

$$46 \quad h(t) = h_0(t) \exp[\beta W]$$

47  
48  
49 This model can be run with additional covariates and results that adjust for the  
50

1  
2  
3  
4  
5  
6  
7  
8  
9 ability to remarry and the number of surviving children are presented.

### 10 11 **Timing of widowhood**

12 The above model considers widowhood as a single time-dependent  
13 covariate, evaluating the association between mortality and being  
14 widowed. One can further ask if that association varies over the life  
15 course by considering the impact of age at widowhood on mortality.  
16 We addressed this issue following the approach of Mineau et al. by  
17 adding terms for age at widowhood into the model as covariates (<45,  
18 45-54, 55-64, 65-74 and >75) to allow the hazard ratio (HR) to vary according to  
19 age at widowhood (see Table 2b).<sup>8</sup> These terms were included in the model  
20 as time-dependent dummy variables, created to represent the  
21 widowhood experience of each individual across the 5 age windows  
22 spanning the individual's age:  $W_{<45}$ ,  $W_{45-54}$ ,  $W_{55-64}$ ,  $W_{65-74}$ , and  $W_{75+}$ .  
23 Further, we also addressed the impact of remarriage and number of  
24 surviving children on mortality of widowed individuals.  
25  
26  
27  
28  
29  
30  
31  
32  
33  
34  
35  
36

37 The following model can be used to estimate the association  
38 between each of the five dummy variables and mortality:  
39

$$40 \quad h(t) = h_0(t) \exp[\sum \beta_j W_j + \beta_6 R + \beta_7 C] \text{ with } j = 1, \dots, 5$$

41 where  $W_1, \dots, W_5$  dummy variables are associated with  $W_{<45}$ ,  $W_{45-54}$ ,  $W_{55-64}$ ,  
42  $W_{65-74}$ ,  $W_{75+}$  columns provided in the Table 2b.  
43  
44  
45  
46

### 47 **Time since bereavement**

48 Next, we evaluated the association between mortality and time since bereavement  
49  
50

1  
2  
3  
4  
5  
6  
7  
8  
9 or widowhood. We followed the approach of Schaefer et al. by considering the  
10 following time since bereavement ranges: 0-6 months, 7-12 months, 13-24  
11 months, 25-36 months, 37-48 months, 49-60 months and > 60 months.<sup>2</sup> This  
12 approach allowed us to estimate HR according to time since bereavement (see  
13 Table 2c). The columns TSB<sub>0-6</sub>, TSB<sub>7-12</sub>, ... in Table 2c are time dependent  
14 covariates that change with the survival time associated with widowed husbands  
15 and wives. We did not account for remarriage in this analysis because of missing  
16 remarriage dates.  
17  
18  
19  
20  
21  
22

23 The following model was used to study the association between mortality and  
24 time since bereavement:  
25

$$26 \quad h(t) = h_0(t) \exp[\sum \beta_j W_j] \text{ with } j = 1, \dots, 7$$

27  
28 where  $W_1, \dots, W_7$  dummy variables are associated with the TSB<sub>0-6</sub>, TSB<sub>7-12</sub>,  
29 TSB<sub>13-24</sub>, TSB<sub>25-36</sub>, TSB<sub>37-48</sub>, TSB<sub>49-60</sub> and TSB<sub>>60</sub> columns provided in  
30 the Table 2c.  
31  
32  
33  
34  
35  
36

## 37 RESULTS

38  
39 We initially partitioned the 15,611 couples from AGDB into four cohorts  
40 ranging in size from 3,210 (husband birth year 1850-1875) to 4,466 (husband  
41 birth year 1876-1900). Wives were more likely to die after their husbands in all  
42 cohorts, although in the three earliest cohorts (prior to 1850, 1850-1875, and  
43 1876-1900), husbands had a higher mean age at death than their wives. The  
44  
45  
46  
47  
48  
49

1  
2  
3  
4  
5  
6  
7  
8  
9 average age differences between the husbands and wives for all cohorts are  
10 shown in Table 1. The number of remarried wives was far smaller than the  
11 number of remarried husbands (n = 1,943 widowed husbands vs 613 widowed  
12 wives). The number and proportion of remarried husbands and wives were  
13 increased in the more contemporary cohorts (see Table 1). In contrast to other  
14 populations from the 19<sup>th</sup> and early 20<sup>th</sup> centuries,<sup>4</sup> the majority of widowed  
15 husbands did not remarry, making it interesting to study the effect of remarriage  
16 in the Amish population.  
17  
18  
19  
20  
21  
22

### 23 **Hazard Ratios**

24  
25 The overall hazard ratios (HR), and their 95% confidence intervals (CIs),  
26 associated with widowhood are displayed in Figure 42 according to birth cohort.  
27  
28 These hazard ratios were estimated using the CPH model and design provided in  
29 Table 2a. As expected, widowhood was associated with increased mortality for  
30 both husbands and wives following the death of spouse, with HRs ranging  
31 from 1.06 to 1.26 (all HRs significantly greater than 1 except for widowed  
32 husbands in cohort 1850-1875). The impact of widowhood was  
33 disproportionately greater on surviving husbands than on surviving wives in the  
34 pre-1850 and 1876-1900 cohorts, although there was little difference in mortality  
35 between widowed husbands vs wives in the 1850-1875 and 1901-1925 cohorts.  
36  
37 There was no clear trend showing that the hazard ratios changed across cohorts  
38 in either surviving husbands or wives. Since no clear differences were observed  
39 between birth cohorts, all birth cohorts were combined to estimate the association  
40  
41  
42  
43  
44  
45  
46  
47  
48  
49  
50

1  
2  
3  
4  
5  
6  
7  
8  
9 between age at widowhood and mortality.

10  
11 Figure 23 shows the hazard ratios (and 95% CIs) for the model in which age  
12 at widowhood is accounted for (design model in Table 2b). These results reveal  
13 markedly higher bereavement effects in each age at widowhood group compared  
14 to the results shown in Figure 42, consistent with the notion that the bereavement  
15 effect may be diminished over time and most pronounced in the years proximal to  
16 the death of the spouse.<sup>2 5 20 21</sup> In nearly all age at widowhood categories, the  
17 bereavement effect is stronger in widowed husbands than in widowed wives.  
18  
19

20  
21  
22  
23  
24 Number of surviving children (> 6 vs ≤ 2) was included as a covariate in the  
25 models whose results are shown in Figure 23. In general, there was a very weak  
26 association between number of surviving children and mortality in widowed  
27 husbands and widowed wives. Contrary to our expectations and a prior study,<sup>8</sup> in  
28 each case, a higher number of surviving children was associated with higher  
29 mortality in the widowed husband/wife. When analyses were repeated without the  
30 number of surviving children as a covariate, the estimates of the hazard ratios  
31 were essentially unchanged (data not shown). Further, the results in Figure 23  
32 show that the effect of bereavement decreases if the widowed individual  
33 remarries.  
34  
35  
36  
37  
38  
39  
40  
41  
42

43 Hazard ratios and 95% CIs for the time since bereavement analysis are shown  
44 in Figure 34. These results were obtained using the CPH model and the design  
45 defined in Table 2c. The results show that there is an increase in risk of mortality  
46 for recently widowed husbands and wives, and the hazard decreases with time  
47  
48  
49

1  
2  
3  
4  
5  
6  
7  
8  
9 since bereavement but remains significantly greater than 1. Further, the hazard is  
10 higher (not significant) in wives vs husbands during the first 12 months following  
11 bereavement. To address the issue that many individuals in the 1901-1925 cohort  
12 may still have been alive at the last AGDB update and hence censored, we  
13 performed the analysis for time since bereavement omitting the cohort 1901-1925.  
14 The results show that the hazard ratios provided in Figure 4 have not changed  
15 significantly; for example, for 25-26 months post bereavement the hazard ratios  
16 change from 1.30 and 1.23 for all cohort to 1.25 and 1.17 for the three eldest  
17 cohorts.

18  
19  
20  
21  
22  
23  
24  
25  
26 Graphical checks of the overall adequacy of the CPH models were  
27 performed.<sup>18 19</sup> Based on the *Cox-Snell residuals* plot, the final model gave a  
28 reasonable fit to the data (data not shown). Further, ~~the~~ deviance residual plots  
29 revealed ~~showed that there were~~ no obvious outliers in the data (data not shown).  
30  
31  
32  
33  
34  
35  
36  
37  
38  
39  
40  
41  
42  
43  
44  
45  
46  
47  
48  
49  
50  
51  
52  
53  
54  
55  
56  
57  
58  
59  
60  
Further, the Wald test statistic was used to test the fit of the final model,<sup>18</sup> and  
according to this test statistic, the final model fits the data reasonably well  
(Supplementary Tables S1, S2, and S3).

## DISCUSSION

This is the first comprehensive study to evaluate the relationship between bereavement and social support in the Amish population. This study provides evidence that Amish widows and widowers have increased mortality risk



1  
2  
3  
4  
5  
6  
7  
8  
9 compared to married cohort members. Although it is difficult to determine  
10 whether this effect is of equivalent magnitude as that observed in studies of other  
11 populations, the most recent studies of the bereavement effect using the CPH  
12 suggest that our findings are generally consistent with data from other  
13 populations.<sup>4</sup>

14  
15  
16  
17  
18 Several previous studies on American, European, and Middle Eastern  
19 populations have found that mortality is magnified in individuals widowed at a  
20 younger age and that widowers have higher mortality risk than widows.<sup>3 5 8 16 20 22</sup>  
21  
22 The LDS study is closest to our study because of the large family sizes and the  
23 population selected as a religious isolate.<sup>8</sup> The effects of bereavement on  
24 mortality with respect to gender and the age at widowhood ranges observed in the  
25 Amish are also largely consistent with those observed in the LDS population,<sup>8</sup> and  
26 other populations such as Finland and Israel (Figure 23).<sup>6 22</sup> As expected,  
27 widowers showed higher hazard ratios than widows except for the 1850-1875  
28 cohort (Figure 12).

29  
30  
31  
32  
33  
34  
35  
36  
37 In the present study, the association between bereavement and mortality is  
38 greater in the first 6 months for both men and women (Figure 34), consistent with  
39 previous findings.<sup>2 3 5 20 21 23</sup> The mortality risks in the first 6 months are lower in  
40 the Amish (Figure 34) compared to some studies,<sup>2 5 20 21</sup> but not all studies.<sup>3 23</sup> One  
41 common pattern observed in this and other studies is that the initially high  
42 bereavement effect first decreases but then increases with time since  
43 bereavement.<sup>3 23</sup> We speculate that the increased mortality during the first 6  
44  
45  
46  
47  
48  
49

1  
2  
3  
4  
5  
6  
7  
8  
9 months might reflect acute effects related to the loss of a spouse, while the  
10 gradual increases in mortality emerging in later life might reflect decreased  
11 survival from aging-related diseases that is unmasked in the absence of spousal  
12 support.  
13  
14

15  
16 Two strengths of our study are that, unlike many of the previously published  
17 studies,<sup>5 13 16 20 21 24</sup> ~~we did not need to incorporate censoring methods into our~~  
18 ~~analysis because of the near completeness of birth and death dates of the Amish~~  
19 ~~widows and widowers~~ we did not incorporate censoring methods into our analysis  
20 because of the high availability of death dates of the Amish widows and widowers  
21 in the first three cohorts; and we could study the effect of remarriage because  
22 there were substantial numbers of widowed individuals who did and did not get  
23 remarried (Table 1). Shor et al. noted that the difficulty in studying the effect of  
24 remarriage in populations where all individuals are deceased because “In previous  
25 decades, widowed men almost always remarried”.<sup>4</sup> As suggested by previous  
26 studies,<sup>8 9</sup> remarriage after the death of a spouse significantly influences the  
27 bereavement effect because it is associated with increased survival of both  
28 widowers and widows across all cohorts and age at widowhood ranges. This  
29 association is likely influenced by the fact that widowers or widows who get  
30 remarried are in sufficiently good physical and mental health to do so. Further,  
31 the survival rate is higher for widowers as compared to widows, possibly  
32 reflecting support in Amish society for males getting remarried.  
33  
34  
35  
36  
37  
38  
39  
40  
41  
42  
43  
44  
45  
46  
47

48 Interestingly, increasing numbers of surviving children at the time of  
49

1  
2  
3  
4  
5  
6  
7  
8  
9 widowhood did not confer a survival advantage for Amish widows or widowers.  
10 This result was counter to our hypothesis that children can help provide social  
11 support for their parents. The hazard ratio was greater than 1.0 (but not  
12 significant) for all widowers and widows with number of surviving children > 6  
13 as compared to ≤ 2. Spouses in the Amish society may also provide unique  
14 emotional, psychological, and social support to each other which cannot be  
15 provided by their surviving children. The lack of protective association was  
16 similarly observed when the number of surviving children was considered as a  
17 linear or as a categorical variable (data not shown). This contrasts with data from  
18 the Utah Population Database, in which increasing numbers of children were  
19 associated with a decreased hazard ratio.<sup>8</sup>

20  
21  
22  
23  
24  
25  
26  
27  
28  
29  
30 ~~Interestingly, increasing numbers of surviving children at the time of~~  
31 ~~widowhood did not confer a survival advantage for Amish widows or widowers.~~  
32  
33 ~~In fact, the hazard ratio was greater than 1.0 for all widowers and widows with~~  
34 ~~number of surviving children > 6 as compared to ≤ 2. This result was counter to~~  
35 ~~our hypothesis that children can help provide social support for their parents. The~~  
36 ~~lack of protective association was similarly observed when the number of~~  
37 ~~surviving children was considered as a linear or as a categorical variable (data not~~  
38 ~~shown). This contrasts with data from the Utah Population Database, in which~~  
39 ~~increasing numbers of children were associated with a decreased hazard ratio.<sup>8</sup>~~

40  
41  
42  
43  
44  
45  
46  
47 The implication of these findings is that differential familial support  
48 following bereavement does not appear to be the key factor affecting mortality  
49

1  
2  
3  
4  
5  
6  
7  
8  
9 increases in widowed Amish populations. One potential explanation is that  
10 spouses, as “attachment figures,” provide a unique, irreplaceable social support  
11 which must be considered independently from other ancillary support providers,  
12 such as children.<sup>25</sup> Data suggesting that relative mortality risk is also elevated in  
13 divorced and never-married populations may support this hypothesis.<sup>3</sup> In addition,  
14 quality of social support has significantly greater effects on well-being than  
15 quantity of support in elderly populations of both sexes.<sup>26</sup>

16  
17  
18  
19  
20  
21  
22 In adults aged 65 and older, lower reported social support has been associated  
23 with decreased life satisfaction and increased depressive symptoms.<sup>27</sup> Family  
24 members and close friends should be especially vigilant during the sensitive acute  
25 period following the loss of a spouse, when relative mortality risk is the highest.

26  
27  
28  
29  
30  
31  
32 A limitation of our data is that causes of death were unavailable. Future  
33 research is needed to determine whether differential measures of social support  
34 may be associated with certain causes of death in widowed populations. Divorce  
35 in the Amish is sufficiently rare that this was not a major potential source of error.

36  
37  
38  
39  
40  
41  
42  
43  
44 Our study results indicate that remarriage plays an important role in  
45 improving the survival rate of widows and widowers in the Amish population.  
46 Contrary to results from previous studies, an increase in the number of surviving  
47 children was associated with a decreased survival rate of widowed individuals.

48  
49  
50  
51  
52  
53  
54  
55  
56  
57  
58  
59  
60  
[Acknowledgments](#) Thanks to two reviewers for excellent suggestions that led us  
to improve the manuscript.

**Contributors** BDM conceived the study. AS and SS did the research and data

1  
2  
3  
4  
5  
6  
7  
8  
9 analysis, with substantial guidance from PFM, BDM, and AAS. AS and SS  
10 wrote the manuscript, with substantial editing by PFM, BDM, and AAS. AAS  
11 managed the project with assistance from BDM. AAS manages the AGDB project  
12 at the National Institutes of Health and KAR managed the AGDB data at  
13 University of Maryland Medical School during the period of this project. ARS  
14 provided resources and advice. All authors proofread and approved the  
15 manuscript.  
16  
17  
18  
19  
20  
21

22 **Funding** This work was supported by research grants R01 HL69313, R01  
23 DK54261, R01 AG1872801, R01 HL088119, R01 AR046838, and U01 HL72515  
24 from the National Institutes of Health. This research was supported in part by the  
25 Intramural Research Program of the National Institutes of Health, NLM and the  
26 Geriatric Research and Education Center, Baltimore Veterans Administration  
27 Medical Center.  
28  
29  
30  
31  
32  
33

34 **Competing interests** None.  
35  
36

37 **Ethics approval** The construction and maintenance of AGDB are covered under  
38 an IRB-approved human subjects protocol at the NIH, Leslie Biesecker, Principal  
39 Investigator.  
40  
41  
42

43 **Provenance and peer review** Not commissioned; externally peer reviewed.  
44  
45

46 **Data sharing statement** Data from the AGDB are available to investigators  
47 (including ARS and various others not participating in this study) who have an  
48 IRB-approved protocol to study the Amish or other Anabaptist groups.  
49  
50

1  
2  
3  
4  
5  
6  
7  
8  
9 Investigators can request access to AGDB by writing to AAS and to Dr.  
10  
11 Biesecker.

## 12 13 REFERENCES

- 14  
15 1. **Jagger C**, Sutton CJ. Death after marital bereavement—Is the risk increased. *Stat*  
16  
17 *Med.* 1991; **10**:395-404.
- 18  
19 2. **Schaefer C**, Quesenberry C, Wi S. Mortality following conjugal bereavement and  
20  
21 the effects of a shared environment. *Am J Epidemiol.* 1995; **141**:1142-1152.
- 22  
23 3. **Johnson NJ**, Backlund E, Sorlie PD, et al. Marital status and mortality: The  
24  
25 national longitudinal mortality study. *Ann Epidemiol.* 2000; **10**:224-238.
- 26  
27 4. **Shor E**, Roelfs DJ, Curreli M, et al. Widowhood and mortality: A meta-analysis  
28  
29 and meta-regression. *Demography.* 2012; **49**:575-606.
- 30  
31 5. **Manor O**, Eisenbach Z. Mortality after spousal loss: Are there socio-  
32  
33 demographic differences? *Soc Sci Med.* 2003; **56**:405-413.
- 34  
35 6. **Martikainen P**, Valkonen T. Mortality after the death of a spouse: rates and  
36  
37 causes of death in a large Finnish cohort. *Am J Public Health.* 1996; **86**:1087-  
38  
39 1093.
- 40  
41 7. **Espinosa J**, Evans WN. Heightened mortality after the death of a spouse:  
42  
43 marriage protection or marriage selection? *J Health Econ.* 2008; **27**:1326-1342.
- 44  
45 8. **Mineau G**, Smith K, Bean L. Historical trends of survival among widows and  
46  
47 widowers. *Soc Sci Med.* 2002; **54**:245-254.
- 48  
49 9. **Helsing KJ**, Szklo M, Comstock GW. Factors associated with mortality after  
50  
51 widowhood. *Am J Public Health.* 1981a; **71**:802-809.

- 1  
2  
3  
4  
5  
6  
7  
8  
9 10. **Stroebe W**, Stroebe MS, Abakoumkin G. Does differential social support cause  
10 sex differences in bereavement outcome? *J Commun Appl Soc Psychol*. 1999;  
11 9:1-12.  
12  
13  
14 11. **Stroebe MS**, Stroebe W, Schut H. Gender differences in adjustment to  
15 bereavement: an empirical and theoretical review. *Rev Gen Psychol*. 2001; 5:62-  
16 83.  
17  
18  
19 12. **Hostetler JA**. *Amish society*. 4<sup>th</sup> ed. The Johns Hopkins University Press, MD;  
20 1993.  
21  
22  
23 13. **Iwasaki M**, Otani T, Sunaga R, et al. Social networks and mortality based on the  
24 Komo-Ise Cohort Study in Japan. *Int J Epidemiol*. 2002; 31:1208-1218.  
25  
26  
27 14. **Agarwala R**, Biesecker LG., Hopkins KA, et al. Software for constructing and  
28 verifying pedigrees within large genealogies and an application to the old order  
29 Amish of Lancaster County. *Genome Res*. 1998; 8:211-221.  
30  
31  
32 15. **Mitchell BD**, Lee W-J, Tolea M, et al. Living the good life? Mortality and  
33 hospital utilization patterns in the Lancaster County Amish. *PLoS ONE*. 2012;  
34 7:e51560.  
35  
36  
37 16. **Smith KR**, Zick CD. Risk of mortality following widowhood: Age and sex  
38 differences by mode of death. *Soc Biol*. 1996; 43:59-71.  
39  
40  
41 17. **R Development Core Team**. *R: A language and environment for statistical*  
42 *computing*. Vienna, Austria: R Foundation for Statistical Computing; 2011.  
43  
44  
45 URL <http://www.R-project.org/>  
46  
47  
48 18. **Therneau TM**, Grambsch PT. *Modeling Survival Data: Extending the Cox Model*  
49  
50

1  
2  
3  
4  
5  
6  
7  
8  
9 *Statistics for Biology and Health*. New York, NY: Springer; 2000.

- 10  
11 19. **Tableman M**, Kim JS. *Survival Analysis Using S: Analysis of Time- to-Event Data*.  
12 1<sup>st</sup> ed. New York, NY: Texts in Statistical Science, Chapman and Hall/CRC; 2004.  
13  
14 20. **Lichtenstein P**, Gatz M, Berg S. A twin study of mortality after spousal bereavement.  
15 *Psychol Med*. 1998; **28**:635-643.  
16  
17 21. **Mendes De Leon CF**, Kasl SV, Jacobs S. Widowhood and mortality risk in a  
18 community sample of the elderly: A prospective study. *J Clin Epidemiol*. 1993;  
19 **46**:519-527.  
20  
21 22. **Peritz E**, Bialik O, Groen JJ. Mortality by marital status in the Jewish population  
22 of Israel. *J Chronic Dis*. 1967; **20**:823-828.  
23  
24 23. **Hart CL**, Hole DJ, Lawlor DA, et al. Effect of conjugal bereavement on mortality  
25 of the bereaved spouse in participants of the Renfrew/Paisley Study. *J Epidemiol*  
26 *Community Health*. 2007; **61**:455-460.  
27  
28 24. **Ikeda A**, Iso H, Toyoshima H, et al. Marital status and mortality among Japanese  
29 men and women: The Japan Collaborative Cohort Study. *BMC Public Health*.  
30 2007; **7**:73.  
31  
32 25. **Diamond LM**. Contributions of psychophysiology to research on adult  
33 attachment: review and recommendations. *Pers Soc Psychol Rev*. 2001; **5**:276-  
34 295.  
35  
36 26. **Antonucci TC**, Akiyama H. An examination of sex differences in social support  
37 among older men and women. *Sex Roles*. 1987; **17**:737-749.  
38  
39  
40  
41  
42  
43  
44  
45  
46  
47  
48  
49  
50  
51  
52  
53  
54  
55  
56  
57  
58  
59  
60



1  
2  
3  
4  
5  
6  
7  
8  
9  
10  
11  
12  
13  
14  
15  
16  
17  
18  
19  
20  
21  
22  
23  
24  
25  
26  
27  
28  
29  
30  
31  
32  
33  
34  
35  
36  
37  
38  
39  
40  
41  
42  
43  
44  
45  
46  
47  
48  
49  
50  
51  
52  
53  
54  
55  
56  
57  
58  
59  
60

27. **Newsom JT**, Schulz R. Social support as a mediator in the relation between functional status and quality of life in older adults. *Psychol Aging*. 1996; **11**:34-44.

For peer review only

## FIGURE LEGENDS

Figure 1. A flow diagram which represents all the steps performed for filtering 15,611 couples from total 136,213 couples available in AGDB. In the flow diagram, each couple is counted as excluded only once, even if multiple exclusion criteria apply. "Unknown spouse" refers to entries in the AGDB relationship table in which at least one parent is unknown; almost all of these entries are for adopted children for whom at least one of the biological parents is unknown. Because AGDB is used primarily in genetic studies (unlike this study), the distinction between biological and adoptive relationships is stored. "Birth year too late" means that the birth year of the husband is known and is > 1925. "Dates not recognized by R" are invalid dates such as the 31st of June, which got into AGDB due to errors in the original sources. "Implausible birth or death dates" refers to a few individuals who are shown as married but have lifespans of less than 10 years likely due to typos in the birth year in the original sources.

Figure [42](#). Hazard ratios of widowed husbands and wives versus their married counterparts (design provided in Table 2a).

Figure [23](#). -Hazard ratios of widowed husbands and wives versus their married counterparts according to age at widowhood. (design provided in Table 2b).

Figure [34](#). -Hazard ratios of widowed husbands and wives versus their married counterparts according to time since bereavement (months). (design provided in Table 2c).

1  
2  
3  
4  
5  
6  
7  
8  
9  
10  
11  
12  
13  
14  
15  
16  
17  
18  
19  
20  
21  
22  
23  
24  
25  
26  
27  
28  
29  
30  
31  
32  
33  
34  
35  
36  
37  
38  
39  
40  
41  
42  
43  
44  
45  
46  
47  
48  
49  
50  
51  
52  
53  
54  
55  
56  
57  
58  
59  
60

|

For peer review only

Formatted: Justified, Indent: Left: 0.5", Right: 0.5", Space After: 0 pt, Line spacing: Double, No widow/orphan control

## TABLES

Table 1: Characteristics of 15,611 spouse pairs according to birth cohort of husband

|                                                 | Cohorts    |            |            |            |
|-------------------------------------------------|------------|------------|------------|------------|
|                                                 | Pre-1850   | 1850-1875  | 1876-1900  | 1901-1925  |
| Number of couples                               | 3711       | 3210       | 4466       | 4224       |
| Number (%) of wives out surviving their husband | 2043(55.0) | 1661(51.7) | 2360(53.0) | 2439(57.7) |
| Number (%) of husbands out surviving their wife | 1668(45.0) | 1549(48.3) | 2106(47.0) | 1785(42.3) |
| Mean husband age at widowhood                   | 63.0       | 59.8       | 62.2       | 67.9       |
| Mean wife age at widowhood                      | 62.0       | 62.8       | 66.5       | 69.6       |
| Mean widowed husband survival in years          | 14.4       | 18.3       | 18.6       | 15.0       |
| Mean widowed wife survival in years             | 15.3       | 16.0       | 17.0       | 15.1       |
| Mean husband age at death                       | 71.1       | 72.0       | 74.6       | 76.2       |
| Mean wife age at death                          | 69.6       | 68.5       | 72.7       | 77.0       |
| Mean age difference husband-wife                | 3.4        | 2.8        | 2.1        | 1.3        |
| Mean number of children                         | 5.4        | 5.3        | 5.3        | 5.8        |
| Number (%) of widowed husbands remarried        | 238(14.2)  | 404(26.0)  | 13(33.8)   | 588(33.0)  |
| Number (%) of widowed wives remarried           | 58(2.8)    | 140(8.4)   | 221(9.4)   | 194(8.0)   |

Table 2a-c. The three tables below illustrate encodings for different CPH designs to test for the bereavement effect, following the general syntax of CPH table designs recommended in (18). See example description in Material and Methods.

Table 2a: Data structure for Cox Proportional Hazard model that does not estimate the effect for different ages, but instead estimates only widowed vs. non-widowed.

| ID | start | stop                 | event | W | R | C |
|----|-------|----------------------|-------|---|---|---|
| 1  | 0     | 47(age at widowhood) | 0     | 0 | 0 | 3 |
| 1  | 47    | 63(age at death)     | 1     | 1 | 1 | 3 |
| 2  | 0     | 60(age at widowhood) | 0     | 0 | 0 | 6 |
| 2  | 60    | 85(age at death)     | 1     | 1 | 0 | 6 |
| 3  | 0     | 59(age at death)     | 1     | 0 | 0 | 4 |

Table 2b: Data structure for Cox Proportional Hazard model that estimates association between widowhood at given ages and mortality.

| ID | start | stop | event | W <sub>&lt;45</sub> | W <sub>45-54</sub> | W <sub>55-64</sub> | W <sub>65-74</sub> | W <sub>75+</sub> | R | C |
|----|-------|------|-------|---------------------|--------------------|--------------------|--------------------|------------------|---|---|
| 1  | 0     | 47   | 0     | 0                   | 0                  | 0                  | 0                  | 0                | 0 | 3 |
| 1  | 47    | 63   | 1     | 0                   | 1                  | 0                  | 0                  | 0                | 1 | 3 |
| 2  | 0     | 60   | 0     | 0                   | 0                  | 0                  | 0                  | 0                | 0 | 6 |
| 2  | 60    | 85   | 1     | 0                   | 0                  | 1                  | 0                  | 0                | 0 | 6 |
| 3  | 0     | 59   | 1     | 0                   | 0                  | 0                  | 0                  | 0                | 0 | 4 |

Table 2c: Data structure for Cox Proportional Hazard model that estimates association between widowhood with respect to time since bereavement and mortality. Start and Stop columns are in years and Time Since Bereavement (TSB) columns are in months.

| ID              | start | stop | event | TSB <sub>0-6</sub> | TSB <sub>7-12</sub> | TSB <sub>13-24</sub> | TSB <sub>25-36</sub> | TSB <sub>37-48</sub> | TSB <sub>49-60</sub> | TSB <sub>&gt;60</sub> |
|-----------------|-------|------|-------|--------------------|---------------------|----------------------|----------------------|----------------------|----------------------|-----------------------|
| ID <sub>1</sub> | 0     | 47   | 0     | 0                  | 0                   | 0                    | 0                    | 0                    | 0                    | 0                     |
| ID <sub>1</sub> | 47    | 47.5 | 0     | 1                  | 0                   | 0                    | 0                    | 0                    | 0                    | 0                     |
| ID <sub>1</sub> | 47.5  | 48   | 0     | 0                  | 1                   | 0                    | 0                    | 0                    | 0                    | 0                     |
| ID <sub>1</sub> | 48    | 49   | 0     | 0                  | 0                   | 1                    | 0                    | 0                    | 0                    | 0                     |
| ID <sub>1</sub> | 49    | 50   | 0     | 0                  | 0                   | 0                    | 1                    | 0                    | 0                    | 0                     |
| ID <sub>1</sub> | 50    | 51   | 0     | 0                  | 0                   | 0                    | 0                    | 1                    | 0                    | 0                     |

|                 |      |      |   |   |   |   |   |   |   |   |
|-----------------|------|------|---|---|---|---|---|---|---|---|
| ID <sub>1</sub> | 51   | 52   | 0 | 0 | 0 | 0 | 0 | 0 | 1 | 0 |
| ID <sub>1</sub> | 52   | 63   | 1 | 0 | 0 | 0 | 0 | 0 | 0 | 1 |
| ID <sub>2</sub> | 0    | 60   | 0 | 0 | 0 | 0 | 0 | 0 | 0 | 0 |
| ID <sub>2</sub> | 60   | 60.5 | 0 | 1 | 0 | 0 | 0 | 0 | 0 | 0 |
| ID <sub>2</sub> | 60.5 | 61   | 0 | 0 | 1 | 0 | 0 | 0 | 0 | 0 |
| ID <sub>2</sub> | 61   | 62   | 0 | 0 | 0 | 1 | 0 | 0 | 0 | 0 |
| ID <sub>2</sub> | 62   | 63   | 0 | 0 | 0 | 0 | 1 | 0 | 0 | 0 |
| ID <sub>2</sub> | 63   | 64   | 0 | 0 | 0 | 0 | 0 | 1 | 0 | 0 |
| ID <sub>2</sub> | 64   | 65   | 0 | 0 | 0 | 0 | 0 | 0 | 1 | 0 |
| ID <sub>2</sub> | 65   | 85   | 1 | 0 | 0 | 0 | 0 | 0 | 0 | 1 |
| ID <sub>3</sub> | 0    | 59   | 1 | 0 | 0 | 0 | 0 | 0 | 0 | 0 |

1  
2  
3  
4  
5  
6  
7  
8  
9  
10  
11  
12  
13  
14  
15  
16  
17  
18  
19  
20  
21  
22  
23  
24  
25  
26  
27  
28  
29  
30  
31  
32  
33  
34  
35  
36  
37  
38  
39  
40  
41  
42  
43  
44  
45  
46  
47  
48  
49  
50  
51  
52  
53  
54  
55  
56  
57  
58  
59  
60

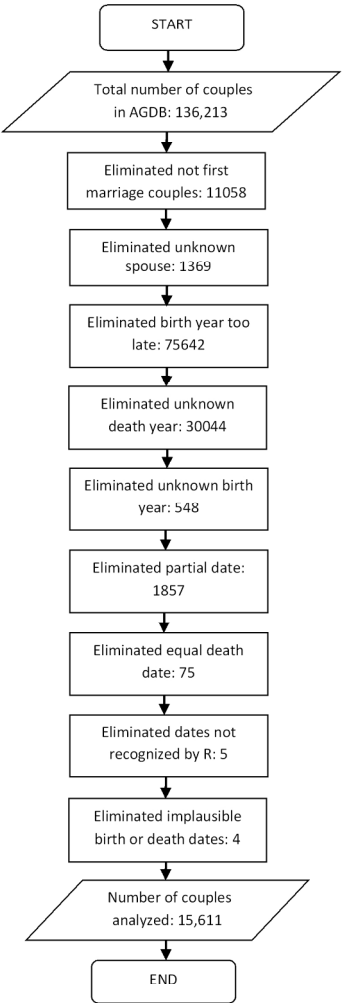

173x233mm (300 x 300 DPI)

1  
2  
3  
4  
5  
6  
7  
8  
9  
10  
11  
12  
13  
14  
15  
16  
17  
18  
19  
20  
21  
22  
23  
24  
25  
26  
27  
28  
29  
30  
31  
32  
33  
34  
35  
36  
37  
38  
39  
40  
41  
42  
43  
44  
45  
46  
47  
48  
49  
50  
51  
52  
53  
54  
55  
56  
57  
58  
59  
60

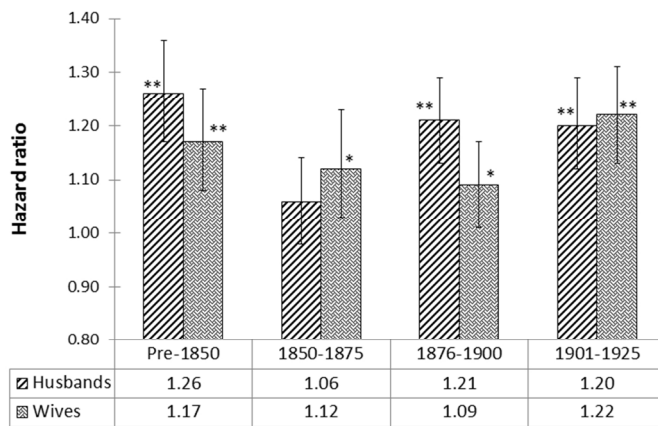

173x233mm (300 x 300 DPI)



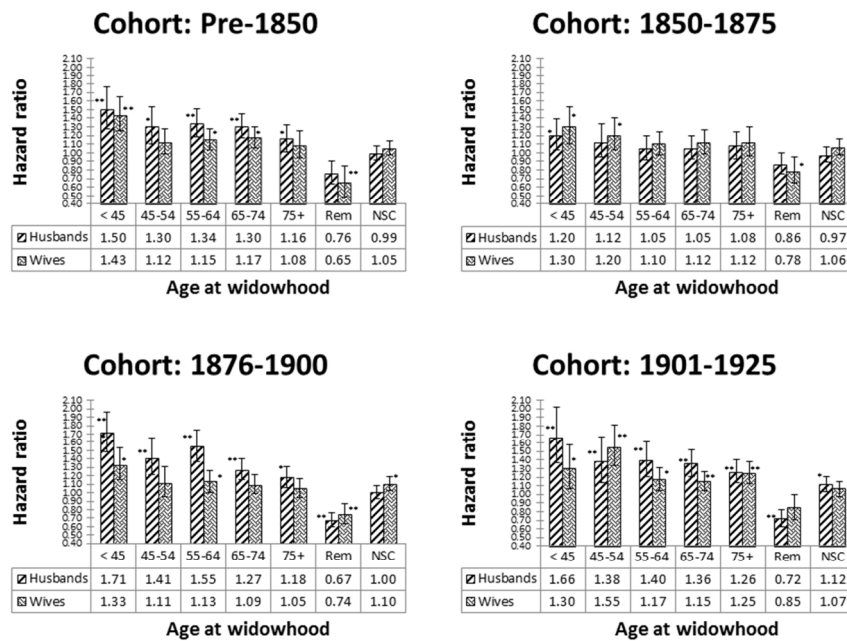

Figure 3. Hazard ratios of widowed husbands and wives versus their married counterparts according to age at widowhood. (design provided in Table 2b).  
173x233mm (300 x 300 DPI)



Figure 4. Hazard ratios of widowed husbands and wives versus their married counterparts according to time since bereavement (months). (design provided in Table 2c).  
173x233mm (300 x 300 DPI)

Table S1: Wald statistics associated with models which are used to study the association between widowhood and mortality.

| Cohorts                 |                    |                  |                    |                    |
|-------------------------|--------------------|------------------|--------------------|--------------------|
|                         | Pre-1850           | 1850-1875        | 1876-1900          | 1901-1925          |
| Husbands                | 38.2 <sup>**</sup> | 5.9 <sup>*</sup> | 33.8 <sup>**</sup> | 28.9 <sup>**</sup> |
| Wives                   | 15.2 <sup>**</sup> | 6.9 <sup>*</sup> | 4.8 <sup>*</sup>   | 26.9 <sup>**</sup> |
| * P<0.05 and ** P<0.001 |                    |                  |                    |                    |

Table S2: Wald statistics associated with models which are used to study the association between timing of widowhood and mortality.

| Cohorts                 |                    |                    |                    |                    |
|-------------------------|--------------------|--------------------|--------------------|--------------------|
|                         | Pre-1850           | 1850-1875          | 1876-1900          | 1901-1925          |
| Husbands                | 57.2 <sup>**</sup> | 15.8 <sup>*</sup>  | 90.6 <sup>**</sup> | 64.4 <sup>**</sup> |
| Wives                   | 39.8 <sup>**</sup> | 20.3 <sup>**</sup> | 30.4 <sup>**</sup> | 50.5 <sup>**</sup> |
| * P<0.05 and ** P<0.001 |                    |                    |                    |                    |

Table S3: Wald statistics associated with models which are used to study the association between time since bereavement and mortality.

|            |                     |
|------------|---------------------|
| Husbands   | 154.3 <sup>**</sup> |
| Wives      | 147.8 <sup>**</sup> |
| ** P<0.001 |                     |

STROBE Statement—Checklist of items that should be included in reports of *cohort studies*

|                           | Item No | Recommendation                                                                                                                                                                                                                                                                                                                                                                                                                                                                                                                                                                                                                                                                                                                                                                                                                                                                                                                                                                                                                                                                                                                                                                                                                                                                                                               |
|---------------------------|---------|------------------------------------------------------------------------------------------------------------------------------------------------------------------------------------------------------------------------------------------------------------------------------------------------------------------------------------------------------------------------------------------------------------------------------------------------------------------------------------------------------------------------------------------------------------------------------------------------------------------------------------------------------------------------------------------------------------------------------------------------------------------------------------------------------------------------------------------------------------------------------------------------------------------------------------------------------------------------------------------------------------------------------------------------------------------------------------------------------------------------------------------------------------------------------------------------------------------------------------------------------------------------------------------------------------------------------|
| <b>Title and abstract</b> | 1       | <p>(a) Indicate the study's design with a commonly used term in the title or the abstract (From Abstract) This study investigates the association between bereavement and the mortality of a surviving spouse among 15,611 Amish couples born during 1725-1925. We evaluated the association of surviving spouse gender, age at widowhood, remarriage, number of surviving children, and time since bereavement on the bereavement effect using the Cox proportional hazard model.</p> <p>(b) Provide in the abstract an informative and balanced summary of what was done and what was found. See Abstract for findings.</p>                                                                                                                                                                                                                                                                                                                                                                                                                                                                                                                                                                                                                                                                                                |
| <b>Introduction</b>       |         |                                                                                                                                                                                                                                                                                                                                                                                                                                                                                                                                                                                                                                                                                                                                                                                                                                                                                                                                                                                                                                                                                                                                                                                                                                                                                                                              |
| Background/rationale      | 2       | <p>Explain the scientific background and rationale for the investigation being reported (From Introduction) It has been consistently established that widowed individuals exhibit increased mortality compared to married individuals.<sup>1-4</sup> This excess mortality risk, referred to as the "bereavement effect," is strongest in the first few years following widowhood, among men who outlive their wives, and among younger widows/widowers.<sup>2-5</sup> Factors proposed to explain this phenomenon include: the acute grief and stress of bereavement; shared environmental risk factors between spouses; marital selection; economic hardship; and loss of social support.<sup>6-7</sup> To gain a different perspective on potential influences of social support on bereavement, we assessed the bereavement effect in an Amish population, whose culture is characterized by its core beliefs in community and social cohesion. Examples of the strong degree of social support within the Amish include community-managed health insurance and community ties through membership in the church, and the sharing of ultraconservative cultural beliefs and lifestyles.<sup>12</sup> We reasoned that the high level of social support in the Amish population might mitigate the bereavement effect.</p> |
| Objectives                | 3       | <p>State specific objectives, including any prespecified hypotheses (From Abstract) We hypothesized that the bereavement effect would be relatively small in the Amish due to the unusually cohesive social structure of the Amish that might attenuate the loss of spousal support. We evaluated the association of surviving spouse gender, age at widowhood, remarriage, number of surviving children, and time since bereavement on the bereavement effect using the Cox proportional hazard model.</p>                                                                                                                                                                                                                                                                                                                                                                                                                                                                                                                                                                                                                                                                                                                                                                                                                  |
| <b>Methods</b>            |         |                                                                                                                                                                                                                                                                                                                                                                                                                                                                                                                                                                                                                                                                                                                                                                                                                                                                                                                                                                                                                                                                                                                                                                                                                                                                                                                              |
| Study design              | 4       | <p>Present key elements of study design early in the paper (From Introduction) We used Cox proportional hazard (CPH) models to analyze the association of bereavement and mortality of widowed husbands and wives. We considered remarriage and number of surviving children as additional potential modifiers of the bereavement effect. (From Material and Methods). The Anabaptist Genealogy Database (AGDB) version 5 was used to study the effect of bereavement of the Amish population.<sup>14-15</sup></p>                                                                                                                                                                                                                                                                                                                                                                                                                                                                                                                                                                                                                                                                                                                                                                                                           |
| Setting                   | 5       | <p>Describe the setting, locations, and relevant dates, including periods of recruitment, exposure, follow-up, and data collection (From Material and Methods) The Anabaptist Genealogy Database (AGDB) version 5 was used to study the effect of bereavement on the Amish population.<sup>14-15</sup> The AGDB is a computerized genealogy database of Amish and some Mennonite populations, last updated in 2010. The AGDB contains information for 539,822 Amish individuals and 136,213 Amish couples. This database includes information about the family relationships and the birth, marriage, and death dates of children of Amish individuals</p>                                                                                                                                                                                                                                                                                                                                                                                                                                                                                                                                                                                                                                                                   |

|                              |    |                                                                                                                                                                                                                                                                                                                                                                                                                                                                                                                                                                                                                                                                                                                                                                                                                                                        |
|------------------------------|----|--------------------------------------------------------------------------------------------------------------------------------------------------------------------------------------------------------------------------------------------------------------------------------------------------------------------------------------------------------------------------------------------------------------------------------------------------------------------------------------------------------------------------------------------------------------------------------------------------------------------------------------------------------------------------------------------------------------------------------------------------------------------------------------------------------------------------------------------------------|
|                              |    | from North America, mostly located in Pennsylvania, Ohio, and Indiana.                                                                                                                                                                                                                                                                                                                                                                                                                                                                                                                                                                                                                                                                                                                                                                                 |
| Participants                 | 6  | (a) Give the eligibility criteria, and the sources and methods of selection of participants. Describe methods of follow-up<br>(From Materials and Methods) For this study, we included couples in which both spouses met four conditions: (1) they were born prior to January 1, 1926; (2) their birth and death dates were recorded; (3) they were in their first marriage; and (4) they did not die on the same day. Constraint (4) excludes couples who may have died from a shared disaster (e.g., accident). A total of 15,611 couples met the inclusion criteria. The oldest person included was born on February 14, 1725, and the youngest on December 31, 1925. Our data set included 15,611 couples with information on their date of birth, date of death, number of surviving children, family IDs, and remarriage status after widowhood. |
|                              |    | (b) For matched studies, give matching criteria and number of exposed and unexposed<br>This is not a matched study                                                                                                                                                                                                                                                                                                                                                                                                                                                                                                                                                                                                                                                                                                                                     |
| Variables                    | 7  | Clearly define all outcomes, exposures, predictors, potential confounders, and effect modifiers. Give diagnostic criteria, if applicable<br>See Material and Methods, especially Table 2.                                                                                                                                                                                                                                                                                                                                                                                                                                                                                                                                                                                                                                                              |
| Data sources/<br>measurement | 8* | For each variable of interest, give sources of data and details of methods of assessment (measurement). Describe comparability of assessment methods if there is more than one group<br>(From Material and Methods) The Anabaptist Genealogy Database (AGDB) version 5 was used to study the effect of bereavement on the Amish population. <sup>14 15</sup> The AGDB is a computerized genealogy database of Amish and some Mennonite populations, last updated in 2010. The AGDB contains information for 539,822 Amish individuals and 136,213 Amish couples. This database includes information about the family relationships and the birth, marriage, and death dates of children of Amish individuals from North America, mostly located in Pennsylvania, Ohio, and Indiana.                                                                    |
| Bias                         | 9  | Describe any efforts to address potential sources of bias<br>We excluded couples who died on the same day. The data are not censored.                                                                                                                                                                                                                                                                                                                                                                                                                                                                                                                                                                                                                                                                                                                  |
| Study size                   | 10 | Explain how the study size was arrived at<br>All couples in AGDB meeting the criteria described in item 5.                                                                                                                                                                                                                                                                                                                                                                                                                                                                                                                                                                                                                                                                                                                                             |
| Quantitative<br>variables    | 11 | Explain how quantitative variables were handled in the analyses. If applicable, describe which groupings were chosen and why<br>(From Material and Methods) For some analyses, these couples were first partitioned into eight cohorts based on the husband's birth year (prior to 1850, 1850-1875, 1876-1900, and 1901-1925) and sex. For the time since bereavement analyses, we did not partition into cohorts because the number of widow(er)s who died within 6 months after being bereaved is small (N=224). Characteristics of these couples by husband birth cohort are shown in Table 1.                                                                                                                                                                                                                                                      |
| Statistical methods          | 12 | (a) Describe all statistical methods, including those used to control for confounding<br>See Material and Methods, especially Table 2.<br>(b) Describe any methods used to examine subgroups and interactions<br>(From Material and Methods) For some analyses, these couples were first partitioned into eight cohorts based on the husband's birth year (prior to 1850, 1850-1875, 1876-1900, and 1901-1925) and sex.                                                                                                                                                                                                                                                                                                                                                                                                                                |

|                  |     |     |                                                                                                                                                                                                                                                                                            |
|------------------|-----|-----|--------------------------------------------------------------------------------------------------------------------------------------------------------------------------------------------------------------------------------------------------------------------------------------------|
|                  |     | (c) | Explain how missing data were addressed<br>Couples with missing dates were excluded.                                                                                                                                                                                                       |
|                  |     | (d) | If applicable, explain how loss to follow-up was addressed<br>Not applicable.                                                                                                                                                                                                              |
|                  |     | (e) | Describe any sensitivity analyses<br>Not applicable                                                                                                                                                                                                                                        |
| <b>Results</b>   |     |     |                                                                                                                                                                                                                                                                                            |
| Participants     | 13* | (a) | Report numbers of individuals at each stage of study—eg numbers potentially eligible, examined for eligibility, confirmed eligible, included in the study, completing follow-up, and analysed<br>See Table 1                                                                               |
|                  |     | (b) | Give reasons for non-participation at each stage<br>Not applicable                                                                                                                                                                                                                         |
|                  |     | (c) | Consider use of a flow diagram<br>We preferred to describe the analysis designs in Table 2.                                                                                                                                                                                                |
| Descriptive data | 14* | (a) | Give characteristics of study participants (eg demographic, clinical, social) and information on exposures and potential confounders<br>See Table 1.                                                                                                                                       |
|                  |     | (b) | Indicate number of participants with missing data for each variable of interest<br>Couples with missing dates were excluded.                                                                                                                                                               |
|                  |     | (c) | Summarise follow-up time (eg, average and total amount)<br>This is a retrospective study; All participants are deceased.                                                                                                                                                                   |
| Outcome data     | 15* |     | Report numbers of outcome events or summary measures over time<br>See Table 1.                                                                                                                                                                                                             |
| Main results     | 16  | (a) | Give unadjusted estimates and, if applicable, confounder-adjusted estimates and their precision (eg, 95% confidence interval). Make clear which confounders were adjusted for and why they were included<br>See Figures 1-3 and text of Results. Figures do show 95% confidence intervals. |
|                  |     | (b) | Report category boundaries when continuous variables were categorized<br>See Table 2.                                                                                                                                                                                                      |
|                  |     | (c) | If relevant, consider translating estimates of relative risk into absolute risk for a meaningful time period<br>Not applicable.                                                                                                                                                            |
| Other analyses   | 17  |     | Report other analyses done—eg analyses of subgroups and interactions, and sensitivity analyses<br>See Results text.                                                                                                                                                                        |

| <b>Discussion</b> |    |                                                                                                                                                                                                                                                                                                                                                                                                                                                                                                                                                                                                                                                                                                                                                                                                                                                                                                                                                                                                                                                                                                                                                                                                                                                                                                                                                                                  |
|-------------------|----|----------------------------------------------------------------------------------------------------------------------------------------------------------------------------------------------------------------------------------------------------------------------------------------------------------------------------------------------------------------------------------------------------------------------------------------------------------------------------------------------------------------------------------------------------------------------------------------------------------------------------------------------------------------------------------------------------------------------------------------------------------------------------------------------------------------------------------------------------------------------------------------------------------------------------------------------------------------------------------------------------------------------------------------------------------------------------------------------------------------------------------------------------------------------------------------------------------------------------------------------------------------------------------------------------------------------------------------------------------------------------------|
| Key results       | 18 | <p>Summarise key results with reference to study objectives</p> <p>(From Discussion) This study provides evidence that Amish widows and widowers have increased mortality risk compared to married cohort members. Although it is difficult to determine whether this effect is of equivalent magnitude as that observed in studies of other populations, the most recent studies of the bereavement effect using the CPH suggest that our findings are generally consistent with data from other populations.<sup>4</sup></p> <p>Interestingly, increasing numbers of surviving children at the time of widowhood did not confer a survival advantage for Amish widows or widowers. In fact, the hazard ratio was greater than 1.0 for all widowers and widows with number of surviving children &gt; 6 as compared to <math>\leq 2</math>. This result was counter to our hypothesis that children can help provide social support for their parents.</p>                                                                                                                                                                                                                                                                                                                                                                                                                      |
| Limitations       | 19 | <p>Discuss limitations of the study, taking into account sources of potential bias or imprecision. Discuss both direction and magnitude of any potential bias</p> <p>(From Discussion) A limitation of our data is that causes of death were unavailable. Future research is needed to determine whether differential measures of social support may be associated with certain causes of death in widowed populations. Divorce in the Amish is sufficiently rare that this was not a major potential source of error.</p>                                                                                                                                                                                                                                                                                                                                                                                                                                                                                                                                                                                                                                                                                                                                                                                                                                                       |
| Interpretation    | 20 | <p>Give a cautious overall interpretation of results considering objectives, limitations, multiplicity of analyses, results from similar studies, and other relevant evidence</p> <p>(From Discussion) The effects of bereavement on mortality with respect to gender and the age at widowhood ranges observed in the Amish are also largely consistent with those observed in the LDS population,<sup>8</sup> and other populations such as Finland and Israel (Figure 2).<sup>6,22</sup> As expected, widowers showed higher hazard ratios than widows except for the 1850-1875 cohort (Figure 1).</p> <p>Two strengths of our study are that, unlike many of the previously published studies,<sup>5,13,16,20,21,24</sup> we did not need to incorporate censoring methods into our analysis because of the near completeness of birth and death dates of the Amish widows and widowers; and we could study the effect of remarriage because there were substantial numbers of widowed individuals who did and did not get remarried (Table 1).</p> <p>Our study results indicate that remarriage plays an important role in improving the survival rate of widows and widowers in the Amish population. Contrary to results from previous studies, an increase in the number of surviving children was associated with a decreased survival rate of widowed individuals.</p> |
| Generalisability  | 21 | <p>Discuss the generalisability (external validity) of the study results</p> <p>(From Discussion) One common pattern observed in this and other studies is that the initially high bereavement effect first decreases but then increases with time since bereavement.<sup>3,23</sup> We speculate that the increased mortality during the first 6 months might reflect acute effects related to the loss of a spouse, while the gradual increases in mortality emerging in later life might reflect decreased survival from aging-related diseases that is unmasked in the absence of spousal support.</p> <p>As suggested by previous studies,<sup>8,9</sup> remarriage after the death of a spouse significantly influences the bereavement effect because it is associated with increased survival of both widowers and widows across all cohorts and age at widowhood ranges. This association is likely influenced by the fact that widowers or widows who get remarried are in sufficiently good physical and mental health to do so. Further, the survival rate is higher for widowers as compared to widows, possibly reflecting support in Amish society for males getting remarried.</p>                                                                                                                                                                               |

1 Our study results indicate that remarriage plays an important role in improving the  
2 survival rate of widows and widowers in the Amish population.  
3

---

**Other information**

---

4  
5 Funding 22 Give the source of funding and the role of the funders for the present study and, if  
6 applicable, for the original study on which the present article is based  
7 (From Acknowledgments) This work was supported by research grants R01 HL69313,  
8 R01 DK54261, R01 AG1872801, R01 HL088119, R01 AR046838, and U01 HL72515  
9 from the National Institutes of Health. This research was supported in part by the  
10 Intramural Research Program of the National Institutes of Health, NLM and the  
11 Geriatric Research and Education Center, Baltimore Veterans Administration Medical  
12 Center. These funders had no role in the study itself.  
13  
14

---

15  
16 \*Give information separately for exposed and unexposed groups.  
17

18 **Note:** An Explanation and Elaboration article discusses each checklist item and gives methodological background and  
19 published examples of transparent reporting. The STROBE checklist is best used in conjunction with this article (freely  
20 available on the Web sites of PLoS Medicine at <http://www.plosmedicine.org/>, Annals of Internal Medicine at  
21 <http://www.annals.org/>, and Epidemiology at <http://www.epidem.com/>). Information on the STROBE Initiative is  
22 available at <http://www.strobe-statement.org>.  
23  
24  
25  
26  
27  
28  
29  
30  
31  
32  
33  
34  
35  
36  
37  
38  
39  
40  
41  
42  
43  
44  
45  
46  
47  
48  
49  
50  
51  
52  
53  
54  
55  
56  
57  
58  
59  
60





## Analysis of the Bereavement Effect After the Death of a Spouse in the Amish

|                                 |                                                                                                                                                                                                                                                                                                                                                                                                                                                                                                                                                                                                                                                                                                                                                                                                                                                                                                                                                                                                                      |
|---------------------------------|----------------------------------------------------------------------------------------------------------------------------------------------------------------------------------------------------------------------------------------------------------------------------------------------------------------------------------------------------------------------------------------------------------------------------------------------------------------------------------------------------------------------------------------------------------------------------------------------------------------------------------------------------------------------------------------------------------------------------------------------------------------------------------------------------------------------------------------------------------------------------------------------------------------------------------------------------------------------------------------------------------------------|
| Journal:                        | <i>BMJ Open</i>                                                                                                                                                                                                                                                                                                                                                                                                                                                                                                                                                                                                                                                                                                                                                                                                                                                                                                                                                                                                      |
| Manuscript ID:                  | bmjopen-2013-003670.R2                                                                                                                                                                                                                                                                                                                                                                                                                                                                                                                                                                                                                                                                                                                                                                                                                                                                                                                                                                                               |
| Article Type:                   | Research                                                                                                                                                                                                                                                                                                                                                                                                                                                                                                                                                                                                                                                                                                                                                                                                                                                                                                                                                                                                             |
| Date Submitted by the Author:   | 06-Nov-2013                                                                                                                                                                                                                                                                                                                                                                                                                                                                                                                                                                                                                                                                                                                                                                                                                                                                                                                                                                                                          |
| Complete List of Authors:       | Seifter, Ari; University of Maryland School of Medicine, Department of Medicine and Program for Personalized and Genomic Medicine<br>Singh, Sarabdeep; National Institutes of Health, NCBI/NLM<br>McArdle, Patrick; University of Maryland School of Medicine, Department of Medicine and Program for Personalized and Genomic Medicine<br>Ryan, Kathleen; University of Maryland School of Medicine, Department of Medicine and Program for Personalized and Genomic Medicine<br>Shuldiner, Alan; University of Maryland School of Medicine, Department of Medicine and Program for Personalized and Genomic Medicine; Veterans Administration Medical Center, Geriatric Research and Education Clinical Center<br>Mitchell, Braxton; University of Maryland School of Medicine, Department of Medicine and Program for Personalized and Genomic Medicine; Veterans Administration Medical Center, Geriatric Research and Education Clinical Center<br>Schaffer, Alejandro; National Institutes of Health, NCBI/NLM |
| <b>Primary Subject Heading</b>: | Epidemiology                                                                                                                                                                                                                                                                                                                                                                                                                                                                                                                                                                                                                                                                                                                                                                                                                                                                                                                                                                                                         |
| Secondary Subject Heading:      | Geriatric medicine, Public health, Sociology                                                                                                                                                                                                                                                                                                                                                                                                                                                                                                                                                                                                                                                                                                                                                                                                                                                                                                                                                                         |
| Keywords:                       | EPIDEMIOLOGY, GERIATRIC MEDICINE, MENTAL HEALTH, PUBLIC HEALTH                                                                                                                                                                                                                                                                                                                                                                                                                                                                                                                                                                                                                                                                                                                                                                                                                                                                                                                                                       |
|                                 |                                                                                                                                                                                                                                                                                                                                                                                                                                                                                                                                                                                                                                                                                                                                                                                                                                                                                                                                                                                                                      |

SCHOLARONE™  
Manuscripts

# Analysis of the Bereavement Effect After the Death of a Spouse in the Amish

Ari Seifter<sup>1a</sup>, Sarabdeep Singh<sup>2a</sup>, Patrick F. McArdle<sup>1</sup>, Kathleen A. Ryan<sup>1</sup>, Alan R. Shuldiner<sup>1,3</sup>, Braxton D. Mitchell<sup>1,3</sup>, Alejandro A. Schäffer<sup>2\*</sup>

<sup>1</sup>Department of Medicine and Program for Personalized and Genomic Medicine, University of Maryland School of Medicine, Baltimore, MD

<sup>2</sup>National Center for Biotechnology Information, National Library of Medicine, National Institutes of Health, DHHS, Bethesda, MD

<sup>3</sup> Geriatric Research and Education Clinical Center, Veterans Administration Medical Center, Baltimore, MD

<sup>a</sup> These authors contributed equally and should be considered aequo loco.

\*To whom correspondence should be addressed at:

Bldg. 38A, Room 6S608

NCBI/NIH

8600 Rockville Pike

Bethesda, MD 20894

e-mail: schaffer@helix.nih.gov

**Author-suggested Keywords:** bereavement effect, Amish, remarriage, social support, Cox proportional hazards, time-dependent covariate

Word Counts:

Abstract: 239

Introduction through Discussion: 2,988.

**ABSTRACT**

**Objective** This study investigates the association between bereavement and the mortality of a surviving spouse among Amish couples. We hypothesized that the bereavement effect would be relatively small in the Amish due to the unusually cohesive social structure of the Amish that might attenuate the loss of spousal support.

**Design** Population-based cohort study

**Setting** United States of America

**Participants** 10,892 Amish couples born during 1725-1900 located in Pennsylvania, Ohio, and Indiana. All the participants are deceased.

**Outcome measure** The survival time is 'age'; event is 'death'. Hazard ratios of widowed individuals with respect to gender, age at widowhood, remarriage, number of surviving children, and time since bereavement.

**Results** We observed hazard ratios for widowhood ranging from 1.06-1.26 over the study period (nearly all differences significant at  $p < 0.05$ ). Mortality risks tended to be higher in men than in women and in younger compared to older bereaved spouses. There were significantly increased mortality risks in both widows and widowers who did not remarry. We observed a higher number of surviving children to be associated with increased mortality in both males and females. Mortality risk following bereavement was higher in the first 6 months among both men and women.

**Conclusions** We conclude that bereavement effects remain apparent even in this

1  
2  
3 socially cohesive Amish community. Remarriage is associated with a significant  
4  
5 decrease in the mortality risk among Amish individuals. Contrary to results from  
6  
7 previous studies, an increase in the number of surviving children was associated  
8  
9 with decreased survival rate.  
10  
11  
12  
13  
14  
15  
16  
17  
18  
19  
20  
21  
22  
23  
24  
25  
26  
27  
28  
29  
30  
31  
32  
33  
34  
35  
36  
37  
38  
39  
40  
41  
42  
43  
44  
45  
46  
47  
48  
49  
50  
51  
52  
53  
54  
55  
56  
57  
58  
59  
60

For peer review only

## ARTICLE SUMMARY

### Article focus

- The focus of this article is to evaluate the relationship between bereavement and social support in the Amish population.
- We evaluated the association of surviving spouse gender, age at widowhood, remarriage, number of surviving children, and time since bereavement on the bereavement effect using Cox proportional hazard models.

### Key messages

- This study shows that strong social support is not sufficient to decrease the mortality risks among Amish individuals, and therefore the support provided by the spouse is irreplaceable.
- Remarriage significantly decreases the mortality risk for both males and females.

### Strengths and limitations of this study

- Due to the availability of remarriage status of the surviving spouses, we could reproduce and quantify the decreased bereavement effect associated with remarriage.
- Due to the unavailability of data on causes of death, it was not possible to determine the relationship between differential measures of social support and certain causes of death.

1  
2  
3  
4  
5  
6  
7  
8  
9  
10  
11  
12  
13  
14  
15  
16  
17  
18  
19  
20  
21  
22  
23  
24  
25  
26  
27  
28  
29  
30  
31  
32  
33  
34  
35  
36  
37  
38  
39  
40  
41  
42  
43  
44  
45  
46  
47  
48  
49  
50  
51  
52  
53  
54  
55  
56  
57  
58  
59  
60

- The number of surviving children was simplified to be a time independent covariate although it may change between the death of the first parent and the death of the second parent.

For peer review only

## INTRODUCTION

It has been consistently established that widowed individuals exhibit increased mortality compared to married individuals.<sup>1-4</sup> This excess mortality risk, referred to as the “bereavement effect,” is strongest in the first few years following widowhood, among men who outlive their wives, and among younger widows/widowers.<sup>2 5</sup> Factors proposed to explain this phenomenon include: the acute grief and stress of bereavement; shared environmental risk factors between spouses; marital selection; economic hardship; and loss of social support.<sup>6 7</sup>

These influences are difficult to isolate and independently assess. Several studies have shown that larger social network size and greater level of social support are generally associated with lower rates of mortality and morbidity.<sup>4</sup> In a study based on the Utah Population Database, mortality risk among widowers decreased with membership in the Church of Latter Day Saints (LDS, a.k.a. Mormon Church) and with increasing numbers of children. These factors were interpreted as proxies for social support.<sup>8</sup> Additionally, a study in Washington County, Maryland, indicated that living alone was a risk factor for increased mortality in widowed populations.<sup>9</sup> Loss of social support following the death of a spouse is generally more profound in widowers than in widows, but there is currently no empirical evidence that this difference mediates the higher mortality consistently observed among widowed husbands compared to widowed wives.<sup>10</sup>

11

The Amish maintain a cultural identity distinct from mainstream American

1  
2  
3 culture that is characterized by their traditional dress, a plain lifestyle, and non-  
4 adoption of modern technology (e.g., electricity, cars, telephones), German  
5 dialect, separate school system, and ultra-conservative Anabaptist religious  
6 practices. A central tenet of Amish culture throughout their history in the USA  
7 has been social cohesiveness with emphasis on family and community. Members  
8 of this tight-knit society have extraordinary social support from cradle to grave,  
9 including community-financing of medical costs and support during times of  
10 need. The community financing of medical costs became increasingly formalized  
11 during the 20th century to the point where it is now a formal system of self-  
12 insurance called “Amish Aid”.  
13  
14  
15  
16  
17  
18  
19  
20  
21  
22  
23  
24  
25  
26

27 To gain a different perspective on potential influences of social support on  
28 bereavement, we assessed the bereavement effect in an Amish population, whose  
29 culture is characterized by its core beliefs in community and social cohesion.  
30 Examples of the strong degree of social support within the Amish include  
31 community-managed health insurance and community ties through membership in  
32 the church, and the sharing of ultraconservative cultural beliefs and lifestyles.<sup>12</sup>  
33 We reasoned that the high level of social support in the Amish population might  
34 mitigate the bereavement effect. Previous studies used covariates such as  
35 education (homogeneous in the Amish),<sup>12</sup> health habits, remarriage, church visits,  
36 neighborhood interaction, and household size to study the relationship between  
37 bereavement and social support.<sup>4 8 13</sup>  
38  
39  
40  
41  
42  
43  
44  
45  
46  
47  
48  
49  
50  
51  
52

53 We estimated bereavement effects in widows and widowers separately, and  
54



1  
2  
3 further assessed mortality risks as a function of age at widowhood and time since  
4 bereavement.<sup>2 8</sup> We used Cox proportional hazard (CPH) models to analyze the  
5 association of bereavement and mortality of widowed husbands and wives. We  
6 considered remarriage and number of surviving children as additional potential  
7 modifiers of the bereavement effect.  
8  
9  
10  
11  
12  
13

## 14 15 16 17 **MATERIAL AND METHODS**

### 18 19 **Data source**

20  
21 The Anabaptist Genealogy Database (AGDB) version 5 was used to study the  
22 effect of bereavement on the Amish population.<sup>14 15</sup> The AGDB is a  
23 computerized genealogy database of Amish and some Mennonite populations, last  
24 updated in 2010. This database includes information about the family  
25 relationships and the birth, marriage, and death dates of children of Amish  
26 individuals from North America, mostly located in Pennsylvania, Ohio, and  
27 Indiana. The "individual table" of AGDB contains information about 539,822  
28 individuals. The "relationship table" includes information about 136,213 Amish  
29 couples. An individual who is married multiple times participates in multiple  
30 relationship table entries. There are 1,369 relationship entries among the 136,213  
31 entries concerning children for whom one or both biological parents are unknown  
32 (Figure 1).  
33  
34  
35  
36  
37  
38  
39  
40  
41  
42  
43  
44  
45  
46  
47  
48  
49

50 Amish people rarely give birth out of wedlock, and a vast majority of the  
51 mating samples we used are documented as marriages in the three original sources  
52  
53  
54

1  
2  
3 from which AGDB is derived. However, there is less availability of marriage  
4 dates than birth dates; we did not wish to exclude couples with missing marriage  
5 dates. For this study, we included couples in which both spouses met four  
6 conditions: (1) they were born prior to January 1, 1901; (2) their birth and death  
7 dates were recorded; (3) they were in their first marriage; and (4) they did not die  
8 on the same day. Constraint (4) excludes couples who may have died from a  
9 shared disaster (e.g., accident). A total of 10,892 couples met the inclusion  
10 criteria. The oldest person included was born on February 14, 1725, and the  
11 youngest on December 30, 1900. See Figure 1 for how the exclusion criteria were  
12 applied.  
13  
14  
15  
16  
17  
18  
19  
20  
21  
22  
23  
24  
25

26  
27 Our data set included 10,892 couples with information on their date of birth,  
28 date of death, number of surviving children, family IDs, and remarriage status  
29 after widowhood. For some analyses, these couples were first partitioned into  
30 three cohorts based on the husband's birth year (prior to 1850 and 1850-1875) and  
31 based on both husband's and wife's birth year (1876-1900) and sex. For the time  
32 since bereavement analyses, we did not partition into cohorts because the number  
33 of widow(er)s who died within 6 months after being bereaved is small (N=291).  
34 Characteristics of these couples are shown in Table 1.  
35  
36  
37  
38  
39  
40  
41  
42  
43  
44  
45  
46

### 47 **Statistical analyses**

48  
49 Similar to several past analyses,<sup>2 8 13 16</sup> we used the Cox Proportional  
50 Hazards (CPH) model where the response variable or survival time is 'age at  
51 death' and the event is 'death'. The model is used to study the association of  
52  
53  
54  
55

1  
2  
3 widowhood and mortality rates in the surviving spouse, while adjusting for  
4 covariates such as education, health habits, age in years, number of children,  
5 and remarriage. In some of our analyses, we adjusted for remarriage and  
6 number of children as covariates; we did not adjust for education or health  
7 habits. Husbands and wives were always analyzed separately.

8  
9  
10  
11  
12  
13  
14  
15 The main covariate, widowhood, was monitored as a time-dependent  
16 covariate, by assigning a value of 1 for each time period the individual was  
17 widowed and 0 otherwise. The remarriage covariate was also a time-dependent  
18 covariate, by assigning a value 1 for the widowed period if the individual  
19 remarried and 0 otherwise. The number of surviving children was a time-  
20 independent covariate and counted at the beginning of widowhood period of the  
21 surviving spouse. The covariate was divided into three categories, as follows:  
22 0=number of surviving children is  $\leq 2$ , 1=number of surviving children is between  
23 3 and 6, and 2=number of surviving children is  $> 6$ . The categories  $\leq 2$  children, 3-  
24 6 children, and  $> 6$  children are separate. These boundaries were chosen to ensure  
25 categories that were roughly balanced in size. To evaluate any possible bias by  
26 counting the number of surviving children at the death of the first spouse, we also  
27 estimated how many couples changed categories between the death of the first  
28 spouse and the death of second spouse due to death of one or more children  
29 during the widowhood period.

30  
31  
32  
33  
34  
35  
36  
37  
38  
39  
40  
41  
42  
43  
44  
45  
46  
47  
48  
49  
50  
51 Survival analyses were performed using the R programming environment.<sup>17</sup>  
52  
53 All estimates and confidence intervals were obtained using the `coxph` function  
54

1  
2  
3 available in the `survival` package.  
4  
5

### 6 **Representation of survival data for CPH analysis**

7

8 We show below examples of how we represented the survival data for CPH  
9 analysis using a time modeling approach. To represent the survival data columns, the  
10 standard approach is to convert the couple's demographic information, date of  
11 death, date of birth, remarriage and number of surviving children into columns  
12 representing **start** time, **stop** time, **event** status, and all of the included covariates  
13 (widowhood, remarriage, and number of surviving children).<sup>18 19</sup> Here (**start**,  
14 **stop**] is an interval of risk, open on the left and closed on the right; the **event**  
15 column is set to 1 if the subject had an event (death) at time **stop** and is 0  
16 otherwise. To illustrate the subtleties, we consider a hypothetical example of  
17 three wives (ID1, ID2 and ID3) from the cohort 1850-1875.  
18  
19  
20  
21  
22  
23  
24  
25  
26  
27  
28  
29  
30  
31  
32  
33

- 34 • *ID*1: born on 01/01/1860; widowed on 01/01/1907 at age 47; got remarried;  
35 number of surviving children = 3 and eventually died on 01/01/1923 at age 63.  
36  
37  
38  
39
- 40 • *ID*2: born on 09/01/1870; widowed on 09/01/1930 at age 60; never got  
41 remarried; number of surviving children = 6 and died on 09/01/1955 at age 85.  
42  
43  
44  
45  
46  
47
- 48 • *ID*3: born on 03/01/1871; never widowed and never remarried; number of  
49 surviving children = 4 and died on 04/01/1930 at age 59.  
50  
51  
52  
53  
54

1  
2  
3 The data used for the CPH considering widowhood as a single time-  
4 dependent covariate is presented in Table 2a. The following model was used to  
5 estimate the association between widowhood and mortality.  
6  
7  
8  
9

$$10 \quad h(t) = h_0(t) \exp[\beta W]$$

11  
12 This model can be run with additional covariates and results that adjust for the  
13 ability to remarry and the number of surviving children are presented.  
14  
15  
16

### 17 **Timing of widowhood**

18  
19 The above model considers widowhood as a single time-dependent  
20 covariate, evaluating the association between mortality and being  
21 widowed. One can further ask if that association varies over the life  
22 course by considering the impact of age at widowhood on mortality.  
23  
24 We addressed this issue following the approach of Mineau et al. by  
25 adding terms for age at widowhood into the model as covariates (<45,  
26 45-54, 55-64, 65-74 and >75) to allow the hazard ratio (HR) to vary according to  
27 age at widowhood (see Table 2b).<sup>8</sup> These terms were included in the model  
28 as time-dependent dummy variables, created to represent the  
29 widowhood experience of each individual across the 5 age windows  
30 spanning the individual's age:  $W_{<45}$ ,  $W_{45-54}$ ,  $W_{55-64}$ ,  $W_{65-74}$ , and  $W_{75+}$ .  
31  
32 Further, we also addressed the impact of remarriage and number of  
33 surviving children on the mortality of Amish individuals.  
34  
35  
36  
37  
38  
39  
40  
41  
42  
43  
44  
45  
46  
47  
48  
49  
50

51 The following model can be used to estimate the association  
52 between each of the five dummy variables and mortality:  
53  
54

$$h(t) = h_0(t) \exp[\sum \beta_j W_j + \beta_6 R + \beta_7 C] \text{ with } j = 1, \dots, 5$$

where  $W_1, \dots, W_5$  dummy variables are associated with  $W_{<45}$ ,  $W_{45-54}$ ,  $W_{55-64}$ ,  $W_{65-74}$ ,  $W_{75+}$  columns provided in the Table 2b.

### **Time since bereavement**

Next, we evaluated the association between mortality and time since bereavement or widowhood. We followed the approach of Schaefer et al. by considering the following time since bereavement ranges: 0-6 months, 7-12 months, 13-24 months, 25-36 months, 37-48 months, 49-60 months and > 60 months.<sup>2</sup> This approach allowed us to estimate HR according to time since bereavement (see Table 2c). The columns  $TSB_{0-6}$ ,  $TSB_{7-12}$ , ... in Table 2c are time dependent covariates that change with the survival time associated with widowed husbands and wives. We did not account for remarriage in this analysis because of missing remarriage dates.

The following model was used to study the association between mortality and time since bereavement:

$$h(t) = h_0(t) \exp[\sum \beta_j W_j] \text{ with } j = 1, \dots, 7$$

where  $W_1, \dots, W_7$  dummy variables are associated with the  $TSB_{0-6}$ ,  $TSB_{7-12}$ ,  $TSB_{13-24}$ ,  $TSB_{25-36}$ ,  $TSB_{37-48}$ ,  $TSB_{49-60}$  and  $TSB_{>60}$  columns provided in the Table 2c.

## **RESULTS**

1  
2  
3 We initially partitioned the 10,892 couples from AGDB into three cohorts ranging  
4 in size from 3,210 (husband birth year 1850-1875) to 3,971 (husband birth year  
5 1876-1900). Wives were more likely to die after their husbands in all three  
6 cohorts while husbands had a higher mean age at death than their wives. The  
7 average age differences between the husbands and wives for all cohorts are shown  
8 in Table 1. The number of remarried wives was far smaller than the number of  
9 remarried husbands (n = 1,290 widowed husbands vs 378 widowed wives). The  
10 number and proportion of remarried husbands and wives were increased in the  
11 more contemporary cohorts (see Table 1). In contrast to other populations from  
12 the 19th and early 20th centuries,<sup>4</sup> the majority of widowed husbands did not  
13 remarry, making it interesting to study the effect of remarriage in the Amish  
14 population.

### 31 Hazard Ratios

32 The overall hazard ratios (HR), and their 95% confidence intervals (CIs),  
33 associated with widowhood are displayed in Figure 2 according to birth cohort.  
34 The significance of these hazard ratios are indicated with the help of p-values  
35 (\*:p-value<0.05 and \*\*:p-value<0.001) on the top of each block in Figure 2.  
36 These hazard ratios were estimated using the CPH model and design provided in  
37 Table 2a. As expected, widowhood was associated with increased mortality for  
38 both husbands and wives following the death of spouse, with HRs ranging  
39 from 1.06 to 1.26 (all HRs significantly greater than 1 except for widowed  
40 husbands in cohort 1850-1875). The impact of widowhood was  
41  
42  
43  
44  
45  
46  
47  
48  
49  
50  
51  
52  
53  
54

1  
2  
3 disproportionately greater on surviving husbands than on surviving wives in the  
4 pre-1850 and 1876-1900 cohorts, although there was little difference in mortality  
5 between widowed husbands vs. wives in the 1850-1875. There was no clear trend  
6 showing that the hazard ratios changed across cohorts in either surviving  
7 husbands or wives.  
8  
9

10  
11  
12  
13  
14  
15  
16  
17  
18  
19  
20  
21  
22  
23  
24  
25  
26  
27  
28  
29  
30  
31  
32  
33  
34  
35  
36  
37  
38  
39  
40  
41  
42  
43  
44  
45  
46  
47  
48  
49  
50  
51  
52  
53  
54  
55  
56  
57  
58  
59  
60  
Figure 3 shows the hazard ratios along with 95% CIs, and range of p-values for the model in which age at widowhood is accounted for (design model in Table 2b). These results reveal markedly higher bereavement effects in each age at widowhood group compared to the results shown in Figure 2, consistent with the notion that the bereavement effect may be diminished over time and most pronounced in the years proximal to the death of the spouse.<sup>2 5 20 21</sup> In nearly all age at widowhood categories, the bereavement effect is stronger in widowed husbands than in widowed wives.

The number of children surviving when the first spouse died (with two pairwise comparisons 3-6 vs  $\leq 2$ ;  $> 6$  vs  $\leq 2$ ) was included as a time-independent covariate in the models whose results are shown in Figure 3. In general, there was a very weak association between number of surviving children and mortality in husbands and wives. Contrary to our expectations and a prior study,<sup>8</sup> in each case, a higher number of surviving children was not significantly associated with lower mortality in both husbands and wives (See Figure 3). Further, the results in Figure 3 show that the effect of bereavement decreases if the Amish individual remarries.



1  
2  
3  
4  
5  
6  
7  
8  
9  
10  
11  
12  
13  
14  
15  
16  
17  
18  
19  
20  
21  
22  
23  
24  
25  
26  
27  
28  
29  
30  
31  
32  
33  
34  
35  
36  
37  
38  
39  
40  
41  
42  
43  
44  
45  
46  
47  
48  
49  
50  
51  
52  
53  
54  
55  
56  
57  
58  
59  
60

There are two potential sources of bias in analyses involving the number of surviving children covariate. Couples in which one spouse died at age <50 are likely not to have as many children as couples in which both parents survived to at least age 50. To quantify this bias, we repeated the analysis in Figure 3 by excluding all the couples who got widowed before age 50 (data not shown). The results show that there is no significant change in the hazard ratios vs. Figure 3. The maximum change for any of the hazard ratios related to the number of surviving children was 0.03 (data not shown).

On the other end of the age spectrum, there is a potential source of bias as more children may die, the longer the surviving parent lives. Because the number of children was divided into three categories  $\leq 2$ , 3-6, and  $> 6$ , any possible bias could arise when and only when the death of a child shifted the number of surviving children from a higher category to a lower category. Over all couples, the number of widows or widowers whose number of surviving children changed to a lower category from the date of widowhood to the date of death was only 298 (< 3% of all couples).

When the analyses corresponding to Figure 3 were repeated excluding these 298 couples, the hazard ratios were essentially unchanged. The maximum change was 0.04; sometimes the hazard ratio increased slightly and sometime it decreased slightly (data not shown).

Hazard ratios and 95% CIs for the time since bereavement analysis are shown in Figure 4. The significant p-values are indicated in Figure 4. These results were

1  
2  
3  
4  
5  
6  
7  
8  
9  
10  
11  
12  
13  
14  
15  
16  
17  
18  
19  
20  
21  
22  
23  
24  
25  
26  
27  
28  
29  
30  
31  
32  
33  
34  
35  
36  
37  
38  
39  
40  
41  
42  
43  
44  
45  
46  
47  
48  
49  
50  
51  
52  
53  
54  
55  
56  
57  
58  
59  
60

obtained using the CPH model and the design defined in Table 2c. The results show that there is an increase in risk of mortality for recently widowed husbands and wives, and the hazard decreases with time since bereavement but remains significantly greater than 1. Further, the hazard is higher (not significant) in wives vs. husbands during the first 12 months following bereavement.

The range of p-values provided in Figures 2-4 indicates the significance of each of the hazard ratios. For example, in Figure 4, the p-value = 0.0001 associated with the hazard ratio = 1.39 (males; time since bereavement range < 6 months) strongly indicates that the hazard ratio is significantly > 1. Similarly, the p-value = 0.039 associated with the hazard ratio = 1.15 (males; time since bereavement 37-48 months) weakly indicates the significance of the hazard ratio > 1.

Graphical checks of the overall adequacy of the CPH models were performed.<sup>18 19</sup> Based on the *Cox-Snell residuals* plot, the final model gave a reasonable fit to the data (data not shown). The *deviance residual* plots revealed no obvious outliers in the data (data not shown). Further, the Wald test statistic was used to test the fit of the final model,<sup>18</sup> and according to this test statistic, the final model fits the data reasonably well (Supplementary Tables S1, S2, and S3).

## DISCUSSION

1  
2  
3 This is the first comprehensive study to evaluate the relationship between  
4 bereavement and social support in the Amish population. This study provides  
5 evidence that Amish widows and widowers have increased mortality risk  
6 compared to married cohort members. Although it is difficult to determine  
7 whether this effect is of equivalent magnitude as that observed in studies of other  
8 populations, the most recent studies of the bereavement effect using the CPH  
9 suggest that our findings are generally consistent with data from other  
10 populations.<sup>4</sup>

11  
12 Several previous studies on American, European, and Middle Eastern  
13 populations have found that mortality is magnified in individuals widowed at a  
14 younger age and that widowers have higher mortality risk than widows.<sup>3 5 8 16 20 22</sup>  
15 The LDS study is closest to our study because of the large family sizes and the  
16 population selected as a religious isolate.<sup>8</sup> The effects of bereavement on  
17 mortality with respect to gender and the age at widowhood ranges observed in the  
18 Amish are also largely consistent with those observed in the LDS population,<sup>8</sup> and  
19 other populations such as Finland and Israel (Figure 3).<sup>6 22</sup> As expected, widowers  
20 showed higher hazard ratios than widows except for the 1850-1875 cohort (Figure  
21 2).

22 In the present study, the association between bereavement and mortality is  
23 greater in the first 6 months for both men and women (Figure 4), consistent with  
24 previous findings.<sup>2 3 5 20 21 23</sup> The mortality risks in the first 6 months are lower in  
25 the Amish (Figure 4) compared to some studies,<sup>2 5 20 21</sup> but not all studies.<sup>3 23</sup> One

1  
2  
3  
4 common pattern observed in this and other studies is that the initially high  
5  
6 bereavement effect first decreases but then increases with time since  
7  
8 bereavement.<sup>3 23</sup> We speculate that the increased mortality during the first 6  
9  
10 months might reflect acute effects related to the loss of a spouse, while the  
11  
12 gradual increases in mortality emerging in later life might reflect decreased  
13  
14 survival from aging-related diseases that is unmasked in the absence of spousal  
15  
16 support.  
17  
18

19  
20 One strength of our study is that we could evaluate the effect of remarriage  
21  
22 because there were substantial numbers of widowed individuals who did and did  
23  
24 not get remarried (Table 1) Shor et al. noted that the difficulty in studying the  
25  
26 effect of remarriage in populations where all individuals are deceased because “In  
27  
28 previous decades, widowed men almost always remarried”.<sup>4</sup> As suggested by  
29  
30 previous studies,<sup>8 9</sup> remarriage after the death of a spouse significantly influences  
31  
32 the bereavement effect because it is associated with increased survival of both  
33  
34 males and females across all cohorts . This association is likely influenced by the  
35  
36 fact that males or females who get remarried are in sufficiently good physical and  
37  
38 mental health to do so. Further, the survival rate is higher for males as compared  
39  
40 to females, possibly reflecting support in Amish society for males getting  
41  
42 remarried.  
43  
44  
45  
46  
47

48 Interestingly, increasing numbers of surviving children at the time of  
49  
50 widowhood did not confer a survival advantage for Amish individuals. This result  
51  
52 was counter to our hypothesis that children can help provide social support for  
53  
54

1  
2  
3 their parents. The hazard ratio was greater than 1.0 (but not significant) for all  
4  
5 Amish individuals with number of surviving children  $> 6$  as compared to  $\leq 2$ .  
6  
7  
8 Spouses in the Amish society may also provide unique emotional, psychological,  
9  
10 and social support to each other which cannot be provided by their surviving  
11  
12 children. The lack of protective association was similarly observed when the  
13  
14 number of surviving children was considered as a linear or as a categorical  
15  
16 variable (data not shown). This contrasts with data from the Utah Population  
17  
18 Database, in which increasing numbers of children were associated with a  
19  
20 decreased hazard ratio.<sup>8</sup>  
21  
22  
23

24  
25 The implication of these findings is that differential familial support  
26  
27 following bereavement does not appear to be the key factor affecting mortality  
28  
29 increases in widowed Amish populations. One potential explanation is that  
30  
31 spouses, as “attachment figures,” provide a unique, irreplaceable social support  
32  
33 which must be considered independently from other ancillary support providers,  
34  
35 such as children.<sup>24</sup> Data suggesting that relative mortality risk is also elevated in  
36  
37 divorced and never-married populations may support this hypothesis.<sup>3</sup> In addition,  
38  
39 quality of social support has significantly greater effects on well-being than  
40  
41 quantity of support in elderly populations of both sexes.<sup>25</sup>  
42  
43  
44

45  
46 In adults aged 65 and older, lower reported social support has been associated  
47  
48 with decreased life satisfaction and increased depressive symptoms.<sup>26</sup> Family  
49  
50 members and close friends should be especially vigilant during the sensitive acute  
51  
52 period following the loss of a spouse, when relative mortality risk is the highest.  
53  
54

1  
2  
3  
4  
5  
6  
7  
8  
9  
10  
11  
12  
13  
14  
15  
16  
17  
18  
19  
20  
21  
22  
23  
24  
25  
26  
27  
28  
29  
30  
31  
32  
33  
34  
35  
36  
37  
38  
39  
40  
41  
42  
43  
44  
45  
46  
47  
48  
49  
50  
51  
52  
53  
54  
55  
56  
57  
58  
59  
60

There are two limitations of our data. First, the number of surviving children covariate was simplified because it was treated as a time-independent covariate, although some children die before their parents, so it could be considered as time-dependent instead. Second, the causes of death were unavailable. Future research is needed to study the effect of the loss of a child on the mortality of husbands and wives by considering the number of surviving children as a time-dependent covariate. Also, research is needed to determine whether differential measures of social support may be associated with certain causes of death in widowed populations. Divorce in the Amish is sufficiently rare that this was not a major potential source of error.

Our study results indicate that remarriage plays an important role in improving the survival rate of males and females in the Amish population. Contrary to results from previous studies, an increase in the number of surviving children was associated with a decreased survival rate of Amish individuals.

**Acknowledgments** Thanks to two reviewers for excellent suggestions that led us to improve the manuscript.

**Contributors** BDM conceived the study. AS and SS did the research and data analysis, with substantial guidance from PFM, BDM, and AAS. AS and SS wrote the manuscript, with substantial editing by PFM, BDM, and AAS. AAS managed the project with assistance from BDM. AAS manages the AGDB project at the National Institutes of Health and KAR managed the AGDB data at University of Maryland Medical School during the period of this project. ARS

1  
2  
3 provided resources and advice. All authors proofread and approved the  
4  
5 manuscript.  
6  
7

8 **Funding** This work was supported by research grants R01 HL69313, R01  
9  
10 DK54261, R01 AG1872801, R01 HL088119, R01 AR046838, and U01 HL72515  
11  
12 from the National Institutes of Health. This research was supported in part by the  
13  
14 Intramural Research Program of the National Institutes of Health, NLM and the  
15  
16 Geriatric Research and Education Center, Baltimore Veterans Administration  
17  
18 Medical Center.  
19  
20  
21

22  
23 **Competing interests** None.  
24  
25

26 **Ethics approval** The construction and maintenance of AGDB are covered under  
27  
28 an IRB-approved human subjects protocol at the NIH, Leslie Biesecker, Principal  
29  
30 Investigator.  
31  
32

33  
34 **Provenance and peer review** Not commissioned; externally peer reviewed.  
35  
36

37 **Data sharing statement** Data from the AGDB are available to investigators  
38  
39 (including ARS and various others not participating in this study) who have an  
40  
41 IRB-approved protocol to study the Amish or other Anabaptist groups.  
42  
43 Investigators can request access to AGDB by writing to AAS and to Dr.  
44  
45 Biesecker.  
46  
47  
48

## 49 REFERENCES

- 50  
51  
52  
53 1. **Jagger C**, Sutton CJ. Death after marital bereavement—Is the risk increased. *Stat*  
54

- 1  
2  
3 *Med.* 1991; **10**:395-404.
- 4  
5  
6 2. **Schaefer C**, Quesenberry C, Wi S. Mortality following conjugal bereavement and  
7 the effects of a shared environment. *Am J Epidemiol.* 1995; **141**:1142-1152.
- 8  
9  
10 3. **Johnson NJ**, Backlund E, Sorlie PD, et al. Marital status and mortality: The  
11 national longitudinal mortality study. *Ann Epidemiol.* 2000; **10**:224-238.
- 12  
13  
14 4. **Shor E**, Roelfs DJ, Curreli M, et al. Widowhood and mortality: A meta-analysis  
15 and meta-regression. *Demography.* 2012; **49**:575-606.
- 16  
17  
18 5. **Manor O**, Eisenbach Z. Mortality after spousal loss: Are there socio-  
19 demographic differences? *Soc Sci Med.* 2003; **56**:405-413.
- 20  
21  
22 6. **Martikainen P**, Valkonen T. Mortality after the death of a spouse: rates and  
23 causes of death in a large Finnish cohort. *Am J Public Health.* 1996; **86**:1087-  
24 1093.
- 25  
26  
27 7. **Espinosa J**, Evans WN. Heightened mortality after the death of a spouse:  
28 marriage protection or marriage selection? *J Health Econ.* 2008; **27**:1326-1342.
- 29  
30  
31 8. **Mineau G**, Smith K, Bean L. Historical trends of survival among widows and  
32 widowers. *Soc Sci Med.* 2002; **54**:245-254.
- 33  
34  
35 9. **Helsing KJ**, Szklo M, Comstock GW. Factors associated with mortality after  
36 widowhood. *Am J Public Health.* 1981a; **71**:802-809.
- 37  
38  
39 10. **Stroebe W**, Stroebe MS, Abakoumkin G. Does differential social support cause  
40 sex differences in bereavement outcome? *J Commun Appl Soc Psychol.* 1999;  
41 **9**:1-12.
- 42  
43  
44 11. **Stroebe MS**, Stroebe W, Schut H. Gender differences in adjustment to  
45  
46  
47  
48  
49  
50  
51  
52  
53  
54



- 1  
2  
3 bereavement: an empirical and theoretical review. *Rev Gen Psychol.* 2001; **5**:62-  
4  
5  
6 83.  
7  
8  
9 12. **Hostetler JA.** *Amish society.* 4<sup>th</sup> ed. The Johns Hopkins University Press, MD;  
10  
11 1993.  
12  
13 13. **Iwasaki M,** Otani T, Sunaga R, et al. Social networks and mortality based on the  
14  
15 Komo-Ise Cohort Study in Japan. *Int J Epidemiol.* 2002; **31**:1208-1218.  
16  
17 14. **Agarwala R,** Biesecker LG., Hopkins KA, et al. Software for constructing and  
18  
19 verifying pedigrees within large genealogies and an application to the old order  
20  
21 Amish of Lancaster County. *Genome Res.* 1998; **8**:211-221.  
22  
23 15. **Mitchell BD,** Lee W-J, Tolea M, et al. Living the good life? Mortality and  
24  
25 hospital utilization patterns in the Lancaster County Amish. *PLoS ONE.* 2012;  
26  
27 **7**:e51560.  
28  
29  
30 16. **Smith KR,** Zick CD. Risk of mortality following widowhood: Age and sex  
31  
32 differences by mode of death. *Soc Biol.* 1996; **43**:59-71.  
33  
34  
35 17. **R Development Core Team.** *R: A language and environment for statistical*  
36  
37 *computing.* Vienna, Austria: R Foundation for Statistical Computing; 2011.  
38  
39 URL <http://www.R-project.org/>  
40  
41  
42 18. **Therneau TM,** Grambsch PT. *Modeling Survival Data: Extending the Cox Model*  
43  
44 *Statistics for Biology and Health.* New York, NY: Springer; 2000.  
45  
46  
47 19. **Tableman M,** Kim JS. *Survival Analysis Using S: Analysis of Time- to-Event Data.*  
48  
49 1<sup>st</sup> ed. New York, NY: Texts in Statistical Science, Chapman and Hall/CRC; 2004.  
50  
51  
52 20. **Lichtenstein P,** Gatz M, Berg S. A twin study of mortality after spousal bereavement.  
53  
54

1  
2  
3 Psychol Med. 1998; **28**:635-643.  
4

- 5  
6 21. **Mendes De Leon CF**, Kasl SV, Jacobs S. Widowhood and mortality risk in a  
7  
8 community sample of the elderly: A prospective study. *J Clin Epidemiol*. 1993;  
9  
10 **46**:519-527.  
11  
12 22. **Peritz E**, Bialik O, Groen JJ. Mortality by marital status in the Jewish population  
13  
14 of Israel. *J Chronic Dis*. 1967; **20**:823-828.  
15  
16 23. **Hart CL**, Hole DJ, Lawlor DA, et al. Effect of conjugal bereavement on mortality  
17  
18 of the bereaved spouse in participants of the Renfrew/Paisley Study. *J Epidemiol*  
19  
20 *Community Health*. 2007; **61**:455-460.  
21  
22 24. **Diamond LM**. Contributions of psychophysiology to research on adult  
23  
24 attachment: review and recommendations. *Pers Soc Psychol Rev*. 2001; **5**:276-  
25  
26 295.  
27  
28 25. **Antonucci TC**, Akiyama H. An examination of sex differences in social support  
29  
30 among older men and women. *Sex Roles*. 1987; **17**:737-749.  
31  
32 26. **Newsom JT**, Schulz R. Social support as a mediator in the relation between  
33  
34 functional status and quality of life in older adults. *Psychol Aging*. 1996; **11**:34-  
35  
36 44.  
37  
38  
39  
40  
41  
42  
43  
44  
45  
46  
47  
48  
49  
50  
51  
52  
53  
54  
55  
56  
57  
58  
59  
60

## FIGURE LEGENDS

Figure 1. A flow diagram that represents all the steps performed for filtering 10,892 couples from total 136,213 couples available in AGDB. In the flow diagram, each couple is counted as excluded only once, even if multiple exclusion criteria apply. “Unknown spouse” refers to entries in the AGDB relationship table in which at least one parent is unknown; almost all of these entries are for adopted children for whom at least one of the biological parents is unknown. Because AGDB is used primarily in genetic studies (unlike this study), the distinction between biological and adoptive relationships is stored. “Birth year too late” means that the birth year of the husband or wife is known and is  $> 1901$ . “Dates not recognized by R” are invalid dates such as the 31st of June, which got into AGDB due to errors in the original sources. “Implausible birth or death dates” refers to a few individuals who are shown as married but have lifespans of less than 10 years likely due to typos in the birth year in the original sources.

Figure 2. Hazard ratios of widowed husbands and wives versus their married counterparts (design provided in Table 2a); \* and \*\* on the top of the blocks represent significance of hazard ratios with  $p\text{-value} < 0.05$  and  $p\text{-value} < 0.001$ , respectively.

Figure 3. Hazard ratios of widowed husbands and wives versus their married counterparts according to age at widowhood (design provided in Table 2b); NSC1: Number of Surviving Children (3-6 vs  $\leq 2$ ); NSC2: Number of Surviving

1  
2  
3 Children (>6 vs ≤ 2); \* and \*\* on the top of the blocks represent significance of  
4 hazard ratios with p-value < 0.05 and p-value < 0.001, respectively.  
5  
6  
7

8 Figure 4. Hazard ratios of widowed husbands and wives versus their married  
9 counterparts according to time since bereavement (months) (design provided in  
10 Table 2c); \* and \*\* on the top of the blocks represent significance of hazard ratios  
11 with p-value < 0.05 and p-value < 0.001, respectively.  
12  
13  
14  
15  
16  
17  
18  
19  
20  
21  
22  
23  
24  
25  
26  
27  
28  
29  
30  
31  
32  
33  
34  
35  
36  
37  
38  
39  
40  
41  
42  
43  
44  
45  
46  
47  
48  
49  
50  
51  
52  
53  
54  
55  
56  
57  
58  
59  
60

## TABLES

Table 1: Characteristics of 10,892 spouse pairs according to birth cohort of husband.

| Cohorts                                         | Pre-1850   | 1850-1875  | 1876-1900  |
|-------------------------------------------------|------------|------------|------------|
| Number of couples                               | 3711       | 3210       | 3971       |
| Number (%) of wives out surviving their husband | 2043(55.0) | 1661(51.7) | 2043(51.4) |
| Number (%) of husbands out surviving their wife | 1668(45.0) | 1549(48.3) | 1928(48.2) |
| Mean husband age at widowhood                   | 63.0       | 59.8       | 62.2       |
| Mean wife age at widowhood                      | 62.0       | 62.8       | 66.9       |
| Mean widowed husband survival in years          | 14.4       | 18.3       | 18.4       |
| Mean widowed wife survival in years             | 15.3       | 16.0       | 16.6       |
| Mean husband age at death                       | 71.1       | 72.0       | 74.6       |
| Mean wife age at death                          | 69.6       | 68.5       | 72.6       |
| Mean age difference husband-wife                | 3.4        | 2.8        | 2.0        |
| Mean number of children                         | 5.4        | 5.3        | 5.3        |
| Number (%) of widowed husbands remarried        | 238(14.2)  | 404(26.0)  | 648(33.6)  |
| Number (%) of widowed wives remarried           | 58(2.8)    | 140(8.4)   | 180(8.8)   |

Table 2a-c. The three tables below illustrate encodings for different CPH designs to test for the bereavement effect, following the general syntax of CPH table designs recommended in (18). See example description in Material and Methods.

Table 2a: Data structure for Cox Proportional Hazard model that does not estimate the effect for different ages, but instead estimates only widowed vs. non-widowed.

| ID | start | stop                 | event | W | R | C |
|----|-------|----------------------|-------|---|---|---|
| 1  | 0     | 47(age at widowhood) | 0     | 0 | 0 | 3 |
| 1  | 47    | 63(age at death)     | 1     | 1 | 1 | 3 |
| 2  | 0     | 60(age at widowhood) | 0     | 0 | 0 | 6 |
| 2  | 60    | 85(age at death)     | 1     | 1 | 0 | 6 |
| 3  | 0     | 59(age at death)     | 1     | 0 | 0 | 4 |

Table 2b: Data structure for Cox Proportional Hazard model that estimates association between widowhood at given ages and mortality.

| ID | start | stop | event | W <sub>&lt;45</sub> | W <sub>45-54</sub> | W <sub>55-64</sub> | W <sub>65-74</sub> | W <sub>75+</sub> | R | C |
|----|-------|------|-------|---------------------|--------------------|--------------------|--------------------|------------------|---|---|
| 1  | 0     | 47   | 0     | 0                   | 0                  | 0                  | 0                  | 0                | 0 | 3 |
| 1  | 47    | 63   | 1     | 0                   | 1                  | 0                  | 0                  | 0                | 1 | 3 |
| 2  | 0     | 60   | 0     | 0                   | 0                  | 0                  | 0                  | 0                | 0 | 6 |
| 2  | 60    | 85   | 1     | 0                   | 0                  | 1                  | 0                  | 0                | 0 | 6 |
| 3  | 0     | 59   | 1     | 0                   | 0                  | 0                  | 0                  | 0                | 0 | 4 |

Table 2c: Data structure for Cox Proportional Hazard model that estimates association between widowhood with respect to time since bereavement and mortality. Start and Stop columns are in years and Time Since Bereavement (TSB) columns are in months.

| ID              | start | stop | event | TSB <sub>0-6</sub> | TSB <sub>7-12</sub> | TSB <sub>13-24</sub> | TSB <sub>25-36</sub> | TSB <sub>37-48</sub> | TSB <sub>49-60</sub> | TSB <sub>&gt;60</sub> |
|-----------------|-------|------|-------|--------------------|---------------------|----------------------|----------------------|----------------------|----------------------|-----------------------|
| ID <sub>1</sub> | 0     | 47   | 0     | 0                  | 0                   | 0                    | 0                    | 0                    | 0                    | 0                     |
| ID <sub>1</sub> | 47    | 47.5 | 0     | 1                  | 0                   | 0                    | 0                    | 0                    | 0                    | 0                     |
| ID <sub>1</sub> | 47.5  | 48   | 0     | 0                  | 1                   | 0                    | 0                    | 0                    | 0                    | 0                     |
| ID <sub>1</sub> | 48    | 49   | 0     | 0                  | 0                   | 1                    | 0                    | 0                    | 0                    | 0                     |
| ID <sub>1</sub> | 49    | 50   | 0     | 0                  | 0                   | 0                    | 1                    | 0                    | 0                    | 0                     |
| ID <sub>1</sub> | 50    | 51   | 0     | 0                  | 0                   | 0                    | 0                    | 1                    | 0                    | 0                     |
| ID <sub>1</sub> | 51    | 52   | 0     | 0                  | 0                   | 0                    | 0                    | 0                    | 1                    | 0                     |

|                 |      |      |   |   |   |   |   |   |   |   |
|-----------------|------|------|---|---|---|---|---|---|---|---|
| ID <sub>1</sub> | 52   | 63   | 1 | 0 | 0 | 0 | 0 | 0 | 0 | 1 |
| ID <sub>2</sub> | 0    | 60   | 0 | 0 | 0 | 0 | 0 | 0 | 0 | 0 |
| ID <sub>2</sub> | 60   | 60.5 | 0 | 1 | 0 | 0 | 0 | 0 | 0 | 0 |
| ID <sub>2</sub> | 60.5 | 61   | 0 | 0 | 1 | 0 | 0 | 0 | 0 | 0 |
| ID <sub>2</sub> | 61   | 62   | 0 | 0 | 0 | 1 | 0 | 0 | 0 | 0 |
| ID <sub>2</sub> | 62   | 63   | 0 | 0 | 0 | 0 | 1 | 0 | 0 | 0 |
| ID <sub>2</sub> | 63   | 64   | 0 | 0 | 0 | 0 | 0 | 1 | 0 | 0 |
| ID <sub>2</sub> | 64   | 65   | 0 | 0 | 0 | 0 | 0 | 0 | 1 | 0 |
| ID <sub>2</sub> | 65   | 85   | 1 | 0 | 0 | 0 | 0 | 0 | 0 | 1 |
| ID <sub>3</sub> | 0    | 59   | 1 | 0 | 0 | 0 | 0 | 0 | 0 | 0 |

## Analysis of the Bereavement Effect After the Death of a Spouse in the Amish

Ari Seifter<sup>1a</sup>, Sarabdeep Singh<sup>2a</sup>, Patrick F. McArdle<sup>1</sup>, Kathleen A. Ryan<sup>1</sup>, Alan R. Shuldiner<sup>1,3</sup>, Braxton D. Mitchell<sup>1,3</sup>, Alejandro A. Schäffer<sup>2\*</sup>

<sup>1</sup>Department of Medicine and Program for Personalized and Genomic Medicine, University of Maryland School of Medicine, Baltimore, MD

<sup>2</sup>National Center for Biotechnology Information, National Library of Medicine, National Institutes of Health, DHHS, Bethesda, MD

<sup>3</sup> Geriatric Research and Education Clinical Center, Veterans Administration Medical Center, Baltimore, MD

<sup>a</sup> These authors contributed equally and should be considered *aequo loco*.

\*To whom correspondence should be addressed at:

Bldg. 38A, Room 6S608

NCBI/NIH

8600 Rockville Pike

Bethesda, MD 20894

e-mail: schaffer@helix.nih.gov

**Author-suggested Keywords:** bereavement effect, Amish, remarriage, social support, Cox proportional hazards, time-dependent covariate

Word Counts:

Abstract: 239

Introduction through Discussion: 2,988.



**ABSTRACT**

**Objective** This study investigates the association between bereavement and the mortality of a surviving spouse among Amish couples. We hypothesized that the bereavement effect would be relatively small in the Amish due to the unusually cohesive social structure of the Amish that might attenuate the loss of spousal support.

**Design** Population-based cohort study

**Setting** United States of America

~~Participants 10,892 Amish couples born during 1725-1900 located in Pennsylvania, Ohio, and Indiana. All the participants are deceased.~~

~~Participants 15,611 Amish couples born during 1725-1925 located in Pennsylvania, Ohio, and Indiana. All the participants are deceased.~~

**Outcome measure** The survival time is 'age'; event is 'death'. Hazard ratios of widowed individuals with respect to gender, age at widowhood, remarriage, number of surviving children, and time since bereavement.

**Results** We observed hazard ratios for widowhood ranging from 1.06-1.26 over the study period (nearly all differences significant at  $p < 0.05$ ). Mortality risks tended to be higher in men than in women and in younger compared to older bereaved spouses. There were significantly increased mortality risks in both widows and widowers who did not remarry. We observed a higher number of surviving children to be associated with increased mortality in both males and females. ~~We observed a higher number of surviving children to be associated with~~

1  
2  
3  
4  
5  
6  
7  
8  
9 ~~increased mortality in both widows and widowers.~~ Mortality risk following  
10 bereavement was higher in the first 6 months among both men and women.

11  
12 **Conclusions** We conclude that bereavement effects remain apparent even in this  
13 socially cohesive Amish community. Remarriage is associated with a significant  
14 decrease in the mortality risk among Amish individuals. ~~Remarriage is associated~~  
15 ~~with a significant decrease in the mortality risk among widowed individuals.~~  
16  
17  
18  
19  
20 Contrary to results from previous studies, an increase in the number of surviving  
21 children was associated with decreased survival rate.  
22  
23  
24  
25  
26  
27  
28  
29  
30  
31  
32  
33  
34  
35  
36  
37  
38  
39  
40  
41  
42  
43  
44  
45  
46  
47  
48  
49  
50  
51  
52  
53  
54  
55  
56  
57  
58  
59  
60

## ARTICLE SUMMARY

### Article focus

- The focus of this article is to evaluate the relationship between bereavement and social support in the Amish population.
- We evaluated the association of surviving spouse gender, age at widowhood, remarriage, number of surviving children, and time since bereavement on the bereavement effect using Cox proportional hazard models.

### Key messages

- This study shows that strong social support is not sufficient to decrease the mortality risks among Amish individuals, and therefore the support provided by the spouse is irreplaceable.~~This study shows that strong social support is not sufficient to decrease the mortality risks of the bereaved individuals and therefore the support provided by the spouse is irreplaceable.~~

- Remarriage significantly decreases the mortality risk for both males and females.

#### Strengths and limitations of this study

- ~~Due to the availability of a large and uncensored dataset, our hazard ratio estimates are mostly significant with narrow confidence intervals.~~
- Due to the availability of remarriage status of the surviving spouses, we could reproduce and quantify the decreased bereavement effect associated with remarriage.
- Due to the unavailability of data on causes of death, it was not possible to determine the relationship between differential measures of social support and certain causes of death.
- The number of surviving children was simplified to be a time independent covariate although it may change between the death of the first parent and the death of the second parent.

## INTRODUCTION

It has been consistently established that widowed individuals exhibit increased mortality compared to married individuals.<sup>1-4</sup> This excess mortality risk, referred to as the “bereavement effect,” is strongest in the first few years following widowhood, among men who outlive their wives, and among younger widows/widowers.<sup>2-5</sup> Factors proposed to explain this phenomenon include: the acute grief and stress of bereavement; shared environmental risk factors between spouses; marital selection; economic hardship; and loss of social support.<sup>6,7</sup>

These influences are difficult to isolate and independently assess. Several studies have shown that larger social network size and greater level of social support are generally associated with lower rates of mortality and morbidity.<sup>4</sup> In a study based on the Utah Population Database, mortality risk among widowers decreased with membership in the Church of Latter Day Saints (LDS, a.k.a. Mormon Church) and with increasing numbers of children. These factors were interpreted as proxies for social support.<sup>8</sup> Additionally, a study in Washington County, Maryland, indicated that living alone was a risk factor for increased mortality in widowed populations.<sup>9</sup> Loss of social support following the death of a spouse is generally more profound in widowers than in widows, but there is currently no empirical evidence that this difference mediates the higher mortality consistently observed among widowed husbands compared to widowed wives.<sup>10</sup>

11

The Amish maintain a cultural identity distinct from mainstream American

1  
2  
3  
4  
5  
6  
7  
8  
9 culture that is characterized by their traditional dress, a plain lifestyle, and non-  
10 adoption of modern technology (e.g., electricity, cars, telephones), German  
11 dialect, separate school system, and ultra-conservative Anabaptist religious  
12 practices. A central tenet of Amish culture throughout their history in the USA  
13 has been social cohesiveness with emphasis on family and community. Members  
14 of this tight-knit society have extraordinary social support from cradle to grave,  
15 including community-financing of medical costs and support during times of  
16 need. The community financing of medical costs became increasingly formalized  
17 during the 20th century to the point where it is now a formal system of self-  
18 insurance called “Amish Aid”.~~Members of this tight knit society have~~  
19 ~~extraordinary social support from cradle to grave, including community managed~~  
20 ~~health insurance and support during times of need. Elderly parents are taken care~~  
21 ~~of by their children and neighbors; they do not use assisted living or nursing~~  
22 ~~homes to care for their elderly.~~  
23  
24  
25  
26  
27  
28  
29  
30  
31  
32  
33  
34

35 To gain a different perspective on potential influences of social support on  
36 bereavement, we assessed the bereavement effect in an Amish population, whose  
37 culture is characterized by its core beliefs in community and social cohesion.  
38 Examples of the strong degree of social support within the Amish include  
39 community-managed health insurance and community ties through membership in  
40 the church, and the sharing of ultraconservative cultural beliefs and lifestyles.<sup>12</sup>  
41 We reasoned that the high level of social support in the Amish population might  
42 mitigate the bereavement effect. Previous studies used covariates such as  
43  
44  
45  
46  
47  
48  
49  
50

1  
2  
3  
4  
5  
6  
7  
8  
9 education (homogeneous in the Amish),<sup>12</sup> health habits, remarriage, church visits,  
10 neighborhood interaction, and household size to study the relationship between  
11 bereavement and social support.<sup>4 8 13</sup>

14 We estimated bereavement effects in widows and widowers separately, and  
15 further assessed mortality risks as a function of age at widowhood and time since  
16 bereavement.<sup>2 8</sup> We used Cox proportional hazard (CPH) models to analyze the  
17 association of bereavement and mortality of widowed husbands and wives. We  
18 considered remarriage and number of surviving children as additional potential  
19 modifiers of the bereavement effect.  
20  
21  
22  
23  
24  
25  
26

## 27 MATERIAL AND METHODS

### 29 Data source

30 The Anabaptist Genealogy Database (AGDB) version 5 was used to study the  
31 effect of bereavement on the Amish population.<sup>14 15</sup> The AGDB is a  
32 computerized genealogy database of Amish and some Mennonite populations, last  
33 updated in 2010. This database includes information about the family  
34 relationships and the birth, marriage, and death dates of children of Amish  
35 individuals from North America, mostly located in Pennsylvania, Ohio, and  
36 Indiana. The "individual table" of AGDB contains information about 539,822  
37 individuals. The "relationship table" includes information about 136,213 Amish  
38 couples. An individual who is married multiple times participates in multiple  
39 relationship table entries. There are 1,369 relationship entries among the 136,213  
40  
41  
42  
43  
44  
45  
46  
47  
48  
49  
50

1  
2  
3  
4  
5  
6  
7  
8  
9 entries concerning children for whom one or both biological parents are unknown  
10  
11 (Figure 1).

12 Amish people rarely give birth out of wedlock, and a vast majority of the  
13 mating samples we used are documented as marriages in the three original sources  
14 from which AGDB is derived. However, there is less availability of marriage  
15 dates than birth dates; we did not wish to exclude couples with missing marriage  
16 dates. For this study, we included couples in which both spouses met four  
17 conditions: (1) they were born prior to January 1, 1901; (2) their birth and death  
18 dates were recorded; (3) they were in their first marriage; and (4) they did not die  
19 on the same day. Constraint (4) excludes couples who may have died from a  
20 shared disaster (e.g., accident). A total of 10,892 couples met the inclusion  
21 criteria. The oldest person included was born on February 14, 1725, and the  
22 youngest on December 30, 1900. See Figure 1 for how the exclusion criteria were  
23 applied.~~Amish people rarely give birth out of wedlock, and a vast majority of the~~  
24 ~~mating samples we used are documented as marriages in the three original sources~~  
25 ~~from which AGDB is derived. However, there is less availability of marriage~~  
26 ~~dates than birth dates; we did not wish to exclude couples with missing marriage~~  
27 ~~dates. For this study, we included couples in which both spouses met four~~  
28 ~~conditions: (1) they were born prior to January 1, 1926; (2) their birth and~~  
29 ~~death dates were recorded; (3) they were in their first marriage; and (4) they did~~  
30 ~~not die on the same day. Constraint (4) excludes couples who may have died from~~  
31 ~~a shared disaster (e.g., accident). A total of 15,611 couples met the inclusion~~  
32  
33  
34  
35  
36  
37  
38  
39  
40  
41  
42  
43  
44  
45  
46  
47  
48  
49  
50



1  
2  
3  
4  
5  
6  
7  
8  
9 ~~criteria. The oldest person included was born on February 14, 1725, and the~~  
10 ~~youngest on December 31, 1925. See Figure 1 for how the exclusion criteria were~~  
11 ~~applied.~~

12  
13  
14 Our data set included 10,892 couples with information on their date of birth,  
15 date of death, number of surviving children, family IDs, and remarriage status  
16 after widowhood. For some analyses, these couples were first partitioned into  
17 three cohorts based on the husband's birth year (prior to 1850 and 1850-1875) and  
18 based on both husband's and wife's birth year (1876-1900) and sex. For the time  
19 since bereavement analyses, we did not partition into cohorts because the number  
20 of widow(er)s who died within 6 months after being bereaved is small (N=291).  
21 Characteristics of these couples are shown in Table 1.~~Our data set included 15,611~~  
22 ~~couples with information on their date of birth, date of death, number of surviving~~  
23 ~~children, family IDs, and remarriage status after widowhood. For some analyses,~~  
24 ~~these couples were first partitioned into eight cohorts based on the husband's birth~~  
25 ~~year (prior to 1850, 1850-1875, 1876-1900, and 1901-1925) and sex. For the time~~  
26 ~~since bereavement analyses, we did not partition into cohorts because the number~~  
27 ~~of widow(er)s who died within 6 months after being bereaved is small (N=224).~~  
28 ~~Characteristics of these couples by husband birth cohort are shown in Table 1.~~

#### Statistical analyses

29  
30  
31  
32  
33  
34  
35  
36  
37  
38  
39  
40  
41  
42  
43  
44  
45 Similar to several past analyses,<sup>2 8 13 16</sup> we used the Cox Proportional  
46 Hazards (CPH) model where the response variable or survival time is 'age at  
47 death' and the event is 'death'. The model is used to study the association of  
48  
49  
50

Formatted: Superscript

widowhood and mortality rates in the surviving spouse, while adjusting for covariates such as education, health habits, age in years, number of children, and remarriage. In some of our analyses, we adjusted for remarriage and number of children as covariates; we did not adjust for education or health habits. Husbands and wives were always analyzed separately. Similar to several past analyses,<sup>2 8 13 16</sup> we used the Cox Proportional where the response variable or survival time 'age at widowhood or death' and the event is 'death'. The model is used to study the association of widowhood and mortality rates in the surviving spouse, while adjusting for covariates such as education, health habits, age in years, number of children, and remarriage. In some of our analyses, we adjusted for remarriage and number of children as covariates; we did not adjust for education or health habits. Widows and widowers were always analyzed separately.

The main covariate, widowhood, was monitored as a time-dependent covariate, by assigning a value of 1 for each time period the individual was widowed and 0 otherwise. The remarriage covariate was also a time-dependent covariate, by assigning a value 1 for the widowed period if the individual remarried and 0 otherwise. The number of surviving children was a time-independent covariate and counted at the beginning of widowhood period of the surviving spouse. The covariate was divided into three categories, as follows: 0=number of surviving children is  $\leq 2$ , 1=number of surviving children is between 3 and 6, and 2=number of surviving children is  $>6$ . The categories  $\leq 2$  children, 3-

1  
2  
3  
4  
5  
6  
7  
8  
9 6 children, and > 6 children are separate. These boundaries were chosen to ensure  
10 categories that were roughly balanced in size. To evaluate any possible bias by  
11 counting the number of surviving children at the death of the first spouse, we also  
12 estimated how many couples changed categories between the death of the first  
13 spouse and the death of second spouse due to death of one or more children  
14 during the widowhood period. The number of surviving children was a time-  
15 independent covariate and divided into categories, as follows: 0=number of  
16 surviving children is  $\leq 2$ , 1=number of surviving children is between 3 and 6, and  
17 2=number of surviving children is  $> 6$ . The categories  $\leq 2$  children, 3-6 children, and  
18  $> 6$  children are separate. These boundaries were chosen to ensure categories that were  
19 roughly balanced in size.

20  
21  
22  
23  
24  
25  
26  
27  
28  
29  
30 Survival analyses were performed using the R programming environment.<sup>17</sup>  
31  
32 All estimates and confidence intervals were obtained using the `coxph` function  
33 available in the `survival` package.

### 34 35 36 **Representation of survival data for CPH analysis**

37  
38 We show below examples of how we represented the survival data for CPH  
39 analysis using a time modeling approach. To represent the survival data columns, the  
40 standard approach is to convert the couple's demographic information, date of  
41 death, date of birth, remarriage and number of surviving children into columns  
42 representing **start** time, **stop** time, **event** status, and all of the included covariates  
43 representing **start** time, **stop** time, **event** status, and all of the included covariates  
44 (widowhood, remarriage, and number of surviving children).<sup>18 19</sup> Here (**start**,  
45  
46  
47 **stop**] is an interval of risk, open on the left and closed on the right; the **event**  
48  
49

1  
2  
3  
4  
5  
6  
7  
8  
9 column is set to 1 if the subject had an event (death) at time **stop** and is 0  
10 otherwise. To illustrate the subtleties, we consider a hypothetical example of  
11 three wives (ID1, ID2 and ID3) from the cohort 1850-1875.  
12  
13

14  
15  
16 • *ID*<sub>1</sub>: born on 01/01/1860; widowed on 01/01/1907 at age 47; got remarried;  
17 number of surviving children = 3 and eventually died on 01/01/1923 at age 63.  
18  
19

20  
21  
22 • *ID*<sub>2</sub>: born on 09/01/1870; widowed on 09/01/1930 at age 60; never got  
23 remarried; number of surviving children = 6 and died on 09/01/1955 at age 85.  
24  
25

26  
27  
28 • *ID*<sub>3</sub>: born on 03/01/1871; never widowed and never remarried; number of  
29 surviving children = 4 and died on 04/01/1930 at age 59.  
30  
31

32  
33  
34 The data used for the CPH considering widowhood as a single time-  
35 dependent covariate is presented in Table 2a. The following model was used to  
36 estimate the association between widowhood and mortality.  
37  
38

$$h(t) = h_0(t) \exp[\beta W]$$

39  
40  
41 This model can be run with additional covariates and results that adjust for the  
42 ability to remarry and the number of surviving children are presented.  
43  
44

#### 45 **Timing of widowhood**

46  
47 The above model considers widowhood as a single time-dependent  
48 covariate, evaluating the association between mortality and being  
49  
50

1  
2  
3  
4  
5  
6  
7  
8  
9 widowed. One can further ask if that association varies over the life  
10 course by considering the impact of age at widowhood on mortality.  
11 We addressed this issue following the approach of Mineau et al. by  
12 adding terms for age at widowhood into the model as covariates (<45,  
13 45-54, 55-64, 65-74 and >75) to allow the hazard ratio (HR) to vary according to  
14 age at widowhood (see Table 2b).<sup>8</sup> These terms were included in the model  
15 as time-dependent dummy variables, created to represent the  
16 widowhood experience of each individual across the 5 age windows  
17 spanning the individual's age:  $W_{<45}$ ,  $W_{45-54}$ ,  $W_{55-64}$ ,  $W_{65-74}$ , and  $W_{75+}$ .

18  
19  
20  
21  
22  
23  
24  
25  
26 Further, we also addressed the impact of remarriage and number of  
27 surviving children on the mortality of Amish individuals.~~Further, we~~  
28 ~~also addressed the impact of remarriage and number of surviving~~  
29 ~~children on mortality of widowed individuals.~~  
30  
31  
32

33  
34 The following model can be used to estimate the association  
35 between each of the five dummy variables and mortality:

$$36 \quad h(t) = h_0(t) \exp[\sum \beta_j W_j + \beta_6 R + \beta_7 C] \text{ with } j = 1, \dots, 5$$

37  
38 where  $W_1, \dots, W_5$  dummy variables are associated with  $W_{<45}$ ,  $W_{45-54}$ ,  $W_{55-64}$ ,  
39  $W_{65-74}$ ,  $W_{75+}$  columns provided in the Table 2b.

#### 40 41 42 43 **Time since bereavement**

44  
45 Next, we evaluated the association between mortality and time since bereavement  
46 or widowhood. We followed the approach of Schaefer et al. by considering the  
47 following time since bereavement ranges: 0-6 months, 7-12 months, 13-24  
48  
49  
50

1  
2  
3  
4  
5  
6  
7  
8  
9 months, 25-36 months, 37-48 months, 49-60 months and > 60 months.<sup>2</sup> This  
10 approach allowed us to estimate HR according to time since bereavement (see  
11 Table 2c). The columns TSB<sub>0-6</sub>, TSB<sub>7-12</sub>, ... in Table 2c are time dependent  
12 covariates that change with the survival time associated with widowed husbands  
13 and wives. We did not account for remarriage in this analysis because of missing  
14 remarriage dates.  
15  
16  
17  
18  
19

20 The following model was used to study the association between mortality and  
21 time since bereavement:  
22

$$23 \quad h(t) = h_0(t) \exp[\sum \beta_j W_j] \text{ with } j = 1, \dots, 7$$

24 where  $W_1, \dots, W_7$  dummy variables are associated with the TSB<sub>0-6</sub>, TSB<sub>7-12</sub>,  
25 TSB<sub>13-24</sub>, TSB<sub>25-36</sub>, TSB<sub>37-48</sub>, TSB<sub>49-60</sub> and TSB<sub>>60</sub> columns provided in  
26 the Table 2c.  
27  
28  
29  
30  
31  
32

## 33 RESULTS

34  
35  
36  
37 We initially partitioned the 10,892 couples from AGDB into three cohorts ranging  
38 in size from 3,210 (husband birth year 1850-1875) to 3,971 (husband birth year  
39 1876-1900). Wives were more likely to die after their husbands in all three  
40 cohorts while husbands had a higher mean age at death than their wives. The  
41 average age differences between the husbands and wives for all cohorts are shown  
42 in Table 1. The number of remarried wives was far smaller than the number of  
43 remarried husbands (n = 1,290 widowed husbands vs 378 widowed wives). The  
44  
45  
46  
47  
48  
49

1  
2  
3  
4  
5  
6  
7  
8  
9 number and proportion of remarried husbands and wives were increased in the  
10 more contemporary cohorts (see Table 1). In contrast to other populations from  
11 the 19th and early 20th centuries,<sup>4</sup> the majority of widowed husbands did not  
12 remarry, making it interesting to study the effect of remarriage in the Amish  
13 population.~~We initially partitioned the 15,611 couples from AGDB into four~~  
14 ~~cohorts ranging in size from 3,210 (husband birth year 1850-1875) to 4,466~~  
15 ~~(husband birth year 1876-1900). Wives were more likely to die after their~~  
16 ~~husbands in all cohorts, although in the three earliest cohorts (prior to 1850,~~  
17 ~~1850-1875, and 1876-1900), husbands had a higher mean age at death than their~~  
18 ~~wives. The average age differences between the husbands and wives for all~~  
19 ~~cohorts are shown in Table 1. The number of remarried wives was far smaller~~  
20 ~~than the number of remarried husbands (n = 1,943 widowed husbands vs 613~~  
21 ~~widowed wives). The number and proportion of remarried husbands and wives~~  
22 ~~were increased in the more contemporary cohorts (see Table 1). In contrast to~~  
23 ~~other populations from the 19<sup>th</sup> and early 20<sup>th</sup> centuries,<sup>4</sup> the majority of widowed~~  
24 ~~husbands did not remarry, making it interesting to study the effect of remarriage~~  
25 ~~in the Amish population.~~

#### 41 **Hazard Ratios**

42 ~~The overall hazard ratios (HR), and their 95% confidence intervals (CIs),~~  
43 ~~associated with widowhood are displayed in Figure 2 according to birth cohort.~~  
44 The overall hazard ratios (HR), and their 95% confidence intervals (CIs),  
45 associated with widowhood are displayed in Figure 2 according to birth cohort.

1  
2  
3  
4  
5  
6  
7  
8  
9 The significance of these hazard ratios are indicated with the help of p-values  
10 (\*:p-value<0.05 and \*\*:p-value<0.001) on the top of each block in Figure 2.

11  
12 These hazard ratios were estimated using the CPH model and design provided in  
13 Table 2a. As expected, widowhood was associated with increased mortality for  
14 both husbands and wives following the death of spouse, with HRs ranging  
15 from 1.06 to 1.26 (all HRs significantly greater than 1 except for widowed  
16 husbands in cohort 1850-1875). The impact of widowhood was  
17 disproportionately greater on surviving husbands than on surviving wives in the  
18 pre-1850 and 1876-1900 cohorts, although there was little difference in mortality  
19 between widowed husbands vs. wives in the 1850-1875. The impact of  
20 widowhood was disproportionately greater on surviving husbands than on  
21 surviving wives in the pre-1850 and 1876-1900 cohorts, although there was little  
22 difference in mortality between widowed husbands vs wives in the 1850-1875 and  
23 1901-1925 cohorts. There was no clear trend showing that the hazard ratios  
24 changed across cohorts in either surviving husbands or wives. Since no clear  
25 differences were observed between birth cohorts, all birth cohorts were combined  
26 to estimate the association between age at widowhood and mortality.

27  
28  
29  
30  
31  
32  
33  
34  
35  
36  
37  
38  
39  
40  
41 Figure 3 shows the hazard ratios (and 95% CIs) for the model in which age at  
42 widowhood is accounted for (design model in Table 2b). Figure 3 shows the  
43 hazard ratios along with 95% CIs, and range of p-values for the model in which  
44 age at widowhood is accounted for (design model in Table 2b). These results  
45 reveal markedly higher bereavement effects in each age at widowhood group  
46  
47  
48  
49



1  
2  
3  
4  
5  
6  
7  
8  
9 compared to the results shown in Figure 2, consistent with the notion that the  
10 bereavement effect may be diminished over time and most pronounced in the  
11 years proximal to the death of the spouse.<sup>2 5 20 21</sup> In nearly all age at widowhood  
12 categories, the bereavement effect is stronger in widowed husbands than in  
13 widowed wives.  
14  
15  
16  
17

18  
19 The number of children surviving when the first spouse died (with two  
20 pairwise comparisons 3-6 vs  $\leq 2$ ;  $> 6$  vs  $\leq 2$ ) was included as a time-independent  
21 covariate in the models whose results are shown in Figure 3. Number of surviving  
22 children ( $> 6$  vs  $\leq 2$ ) was included as a covariate in the models whose results are  
23 shown in Figure 3. In general, there was a very weak association between number  
24 of surviving children and mortality in husbands and wives. Contrary to our  
25 expectations and a prior study,<sup>8</sup> in each case, a higher number of surviving  
26 children was not significantly associated with lower mortality in both husbands  
27 and wives (See Figure 3). Further, the results in Figure 3 show that the effect of  
28 bereavement decreases if the Amish individual remarries.  
29  
30  
31  
32  
33  
34  
35  
36

37  
38 There are two potential sources of bias in analyses involving the number of  
39 surviving children covariate. Couples in which one spouse died at age  $< 50$  are  
40 likely not to have as many children as couples in which both parents survived to  
41 at least age 50. To quantify this bias, we repeated the analysis in Figure 3 by  
42 excluding all the couples who got widowed before age 50 (data not shown). The  
43 results show that there is no significant change in the hazard ratios vs. Figure 3.  
44 The maximum change for any of the hazard ratios related to the number of  
45  
46  
47  
48  
49  
50

1  
2  
3  
4  
5  
6  
7  
8  
9 surviving children was 0.03 (data not shown).

10 On the other end of the age spectrum, there is a potential source of bias as  
11 more children may die, the longer the surviving parent lives. Because the number  
12 of children was divided into three categories  $\leq 2$ , 3-6, and  $> 6$ , any possible bias  
13 could arise when and only when the death of a child shifted the number of  
14 surviving children from a higher category to a lower category. Over all couples,  
15 the number of widows or widowers whose number of surviving children changed  
16 to a lower category from the date of widowhood to the date of death was only 298  
17 (< 3% of all couples).

18 When the analyses corresponding to Figure 3 were repeated excluding these  
19 298 couples, the hazard ratios were essentially unchanged. The maximum change  
20 was 0.04; sometimes the hazard ratio increased slightly and sometime it decreased  
21 slightly (data not shown). In general, there was a very weak association between  
22 number of surviving children and mortality in widowed husbands and widowed  
23 wives. Contrary to our expectations and a prior study,<sup>8</sup> in each case, a higher  
24 number of surviving children was associated with higher mortality in the  
25 widowed husband/wife. When analyses were repeated without the number of  
26 surviving children as a covariate, the estimates of the hazard ratios were  
27 essentially unchanged (data not shown). Further, the results in Figure 3 show that  
28 the effect of bereavement decreases if the widowed individual remarries.

29 Hazard ratios and 95% CIs for the time since bereavement analysis are shown  
30 in Figure 4. The significant p-values are indicated in Figure 4. These results were

1  
2  
3  
4  
5  
6  
7  
8  
9  
10  
11  
12  
13  
14  
15  
16  
17  
18  
19  
20  
21  
22  
23  
24  
25  
26  
27  
28  
29  
30  
31  
32  
33  
34  
35  
36  
37  
38  
39  
40  
41  
42  
43  
44  
45  
46  
47  
48  
49  
50  
51  
52  
53  
54  
55  
56  
57  
58  
59  
60

obtained using the CPH model and the design defined in Table 2c. The results show that there is an increase in risk of mortality for recently widowed husbands and wives, and the hazard decreases with time since bereavement but remains significantly greater than 1. Further, the hazard is higher (not significant) in wives vs. husbands during the first 12 months following bereavement. Hazard ratios and 95% CIs for the time since bereavement analysis are shown in Figure 4. These results were obtained using the CPH model and the design defined in Table 2c. The results show that there is an increase in risk of mortality for recently widowed husbands and wives, and the hazard decreases with time since bereavement but remains significantly greater than 1. Further, the hazard is higher (not significant) in wives vs husbands during the first 12 months following bereavement. To address the issue that many individuals in the 1901-1925 cohort may still have been alive at the last AGDB update and hence censored, we performed the analysis for time since bereavement omitting the cohort 1901-1925. The results show that the hazard ratios provided in Figure 4 have not changed significantly; for example, for 25-26 months post bereavement the hazard ratios change from 1.30 and 1.23 for all cohort to 1.25 and 1.17 for the three eldest cohorts.

The range of p-values provided in Figures 2-4 indicates the significance of each of the hazard ratios. For example, in Figure 4, the p-value = 0.0001 associated with the hazard ratio = 1.39 (males; time since bereavement range < 6 months) strongly indicates that the hazard ratio is significantly > 1. Similarly, the p-value = 0.039 associated with the hazard ratio = 1.15 (males; time since

1  
2  
3  
4  
5  
6  
7  
8  
9 bereavement 37-48 months) weakly indicates the significance of the hazard ratio  
10 > 1.

11  
12 Graphical checks of the overall adequacy of the CPH models were  
13 performed.<sup>18 19</sup> Based on the *Cox-Snell residuals* plot, the final model gave a  
14 reasonable fit to the data (data not shown). The *deviance residual* plots  
15 revealed no obvious outliers in the data (data not shown). Further, the Wald test  
16 statistic was used to test the fit of the final model,<sup>18</sup> and according to this test  
17 statistic, the final model fits the data reasonably well (Supplementary Tables S1,  
18 S2, and S3).  
19  
20  
21  
22  
23  
24  
25  
26

## 27 **DISCUSSION**

28  
29  
30  
31 This is the first comprehensive study to evaluate the relationship between  
32 bereavement and social support in the Amish population. This study provides  
33 evidence that Amish widows and widowers have increased mortality risk  
34 compared to married cohort members. Although it is difficult to determine  
35 whether this effect is of equivalent magnitude as that observed in studies of other  
36 populations, the most recent studies of the bereavement effect using the CPH  
37 suggest that our findings are generally consistent with data from other  
38 populations.<sup>4</sup>  
39  
40  
41  
42  
43  
44  
45

46 Several previous studies on American, European, and Middle Eastern  
47 populations have found that mortality is magnified in individuals widowed at a  
48  
49

1  
2  
3  
4  
5  
6  
7  
8  
9 younger age and that widowers have higher mortality risk than widows.<sup>3 5 8 16 20 22</sup>

10 The LDS study is closest to our study because of the large family sizes and the  
11 population selected as a religious isolate.<sup>8</sup> The effects of bereavement on  
12 mortality with respect to gender and the age at widowhood ranges observed in the  
13 Amish are also largely consistent with those observed in the LDS population,<sup>8</sup> and  
14 other populations such as Finland and Israel (Figure 3).<sup>6 22</sup> As expected, widowers  
15 showed higher hazard ratios than widows except for the 1850-1875 cohort (Figure  
16 2).  
17

18 In the present study, the association between bereavement and mortality is  
19 greater in the first 6 months for both men and women (Figure 4), consistent with  
20 previous findings.<sup>2 3 5 20 21 23</sup> The mortality risks in the first 6 months are lower in  
21 the Amish (Figure 4) compared to some studies,<sup>2 5 20 21</sup> but not all studies.<sup>3 23</sup> One  
22 common pattern observed in this and other studies is that the initially high  
23 bereavement effect first decreases but then increases with time since  
24 bereavement.<sup>3 23</sup> We speculate that the increased mortality during the first 6  
25 months might reflect acute effects related to the loss of a spouse, while the  
26 gradual increases in mortality emerging in later life might reflect decreased  
27 survival from aging-related diseases that is unmasked in the absence of spousal  
28 support.  
29

30 One strength of our study is that we could evaluate the effect of remarriage  
31 because there were substantial numbers of widowed individuals who did and did  
32 not get remarried (Table 1) Two strengths of our study are that, unlike many of the  
33

1  
2  
3  
4  
5  
6  
7  
8  
9 previously published studies,<sup>5 13 16 20 21 24</sup> we did not incorporate censoring  
10 methods into our analysis because of the high availability of death dates of the  
11 Amish widows and widowers in the first three cohorts; and we could study the  
12 effect of remarriage because there were substantial numbers of widowed  
13 individuals who did and did not get remarried (Table 1). Shor et al. noted that the  
14 difficulty in studying the effect of remarriage in populations where all individuals  
15 are deceased because “In previous decades, widowed men almost always  
16 remarried”.<sup>4</sup> As suggested by previous studies,<sup>8 9</sup> remarriage after the death of a  
17 spouse significantly influences the bereavement effect because it is associated  
18 with increased survival of both males and females across all cohorts . This  
19 association is likely influenced by the fact that males or females who get  
20 remarried are in sufficiently good physical and mental health to do so. Further,  
21 the survival rate is higher for males as compared to females, possibly reflecting  
22 support in Amish society for males getting remarried.As suggested by previous  
23 studies;<sup>8-9</sup> remarriage after the death of a spouse significantly influences the  
24 bereavement effect because it is associated with increased survival of both  
25 widowers and widows across all cohorts and age at widowhood ranges. This  
26 association is likely influenced by the fact that widowers or widows who get  
27 remarried are in sufficiently good physical and mental health to do so. Further,  
28 the survival rate is higher for widowers as compared to widows, possibly  
29 reflecting support in Amish society for males getting remarried.

30  
31  
32  
33  
34  
35  
36  
37  
38  
39  
40  
41  
42  
43  
44  
45  
46  
47  
48 Interestingly, increasing numbers of surviving children at the time of  
49

1  
2  
3  
4  
5  
6  
7  
8  
9 widowhood did not confer a survival advantage for Amish individuals. This result  
10 was counter to our hypothesis that children can help provide social support for  
11 their parents. The hazard ratio was greater than 1.0 (but not significant) for all  
12 Amish individuals with number of surviving children > 6 as compared to ≤  
13 2. Interestingly, increasing numbers of surviving children at the time of  
14 widowhood did not confer a survival advantage for Amish widows or widowers.  
15 This result was counter to our hypothesis that children can help provide social  
16 support for their parents. The hazard ratio was greater than 1.0 (but not  
17 significant) for all widowers and widows with number of surviving children > 6  
18 as compared to ≤ 2. Spouses in the Amish society may also provide unique  
19 emotional, psychological, and social support to each other which cannot be  
20 provided by their surviving children. The lack of protective association was  
21 similarly observed when the number of surviving children was considered as a  
22 linear or as a categorical variable (data not shown). This contrasts with data from  
23 the Utah Population Database, in which increasing numbers of children were  
24 associated with a decreased hazard ratio.<sup>8</sup>

25  
26  
27  
28  
29  
30  
31  
32  
33  
34  
35  
36  
37  
38  
39  
40  
41 The implication of these findings is that differential familial support  
42 following bereavement does not appear to be the key factor affecting mortality  
43 increases in widowed Amish populations. One potential explanation is that  
44 spouses, as “attachment figures,” provide a unique, irreplaceable social support  
45 which must be considered independently from other ancillary support providers,  
46  
47  
48  
49

1  
2  
3  
4  
5  
6  
7  
8  
9 such as children.<sup>254</sup> Data suggesting that relative mortality risk is also elevated in  
10 divorced and never-married populations may support this hypothesis.<sup>3</sup> In addition,  
11 quality of social support has significantly greater effects on well-being than  
12 quantity of support in elderly populations of both sexes.<sup>265</sup>

13  
14  
15  
16 In adults aged 65 and older, lower reported social support has been associated  
17 with decreased life satisfaction and increased depressive symptoms.<sup>276</sup> Family  
18 members and close friends should be especially vigilant during the sensitive acute  
19 period following the loss of a spouse, when relative mortality risk is the highest.  
20  
21  
22  
23

24 ~~A limitation of our data is that causes of death were unavailable. Future~~  
25 ~~research is needed to determine whether differential measures of social support~~  
26 ~~may be associated with certain causes of death in widowed populations. Divorce~~  
27 ~~in the Amish is sufficiently rare that this was not a major potential source of error.~~  
28  
29 There are two limitations of our data. First, the number of surviving children  
30 covariate was simplified because it was treated as a time-independent covariate,  
31 although some children die before their parents, so it could be considered as time-  
32 dependent instead. Second, the causes of death were unavailable. Future research  
33 is needed to study the effect of the loss of a child on the mortality of husbands and  
34 wives by considering the number of surviving children as a time-dependent  
35 covariate. Also, research is needed to determine whether differential measures of  
36 social support may be associated with certain causes of death in widowed  
37 populations. Divorce in the Amish is sufficiently rare that this was not a major  
38 potential source of error.  
39  
40  
41  
42  
43  
44  
45  
46  
47  
48  
49



1  
2  
3  
4  
5  
6  
7  
8  
9 Our study results indicate that remarriage plays an important role in  
10 improving the survival rate of males and females in the Amish population.  
11 Contrary to results from previous studies, an increase in the number of surviving  
12 children was associated with a decreased survival rate of Amish individuals.~~Our~~  
13 ~~study results indicate that remarriage plays an important role in improving the~~  
14 ~~survival rate of widows and widowers in the Amish population. Contrary to~~  
15 ~~results from previous studies, an increase in the number of surviving children was~~  
16 ~~associated with a decreased survival rate of widowed individuals.~~

17  
18  
19  
20  
21  
22  
23  
24 **Acknowledgments** Thanks to two reviewers for excellent suggestions that led us  
25 to improve the manuscript.

26  
27  
28 **Contributors** BDM conceived the study. AS and SS did the research and data  
29 analysis, with substantial guidance from PFM, BDM, and AAS. AS and SS  
30 wrote the manuscript, with substantial editing by PFM, BDM, and AAS. AAS  
31 managed the project with assistance from BDM. AAS manages the AGDB project  
32 at the National Institutes of Health and KAR managed the AGDB data at  
33 University of Maryland Medical School during the period of this project. ARS  
34 provided resources and advice. All authors proofread and approved the  
35 manuscript.

36  
37  
38  
39  
40  
41  
42  
43 **Funding** This work was supported by research grants R01 HL69313, R01  
44 DK54261, R01 AG1872801, R01 HL088119, R01 AR046838, and U01 HL72515  
45 from the National Institutes of Health. This research was supported in part by the  
46 Intramural Research Program of the National Institutes of Health, NLM and the

1  
2  
3  
4  
5  
6  
7  
8  
9 Geriatric Research and Education Center, Baltimore Veterans Administration  
10 Medical Center.

11  
12  
13 **Competing interests** None.

14  
15  
16 **Ethics approval** The construction and maintenance of AGDB are covered under  
17 an IRB-approved human subjects protocol at the NIH, Leslie Biesecker, Principal  
18 Investigator.  
19

20  
21  
22 **Provenance and peer review** Not commissioned; externally peer reviewed.  
23

24  
25 **Data sharing statement** Data from the AGDB are available to investigators  
26 (including ARS and various others not participating in this study) who have an  
27 IRB-approved protocol to study the Amish or other Anabaptist groups.  
28 Investigators can request access to AGDB by writing to AAS and to Dr.  
29 Biesecker.  
30  
31  
32  
33

#### 34 35 REFERENCES

- 36  
37 1. **Jagger C**, Sutton CJ. Death after marital bereavement—Is the risk increased. *Stat*  
38 *Med.* 1991; **10**:395-404.  
39  
40 2. **Schaefer C**, Quesenberry C, Wi S. Mortality following conjugal bereavement and  
41 the effects of a shared environment. *Am J Epidemiol.* 1995; **141**:1142-1152.  
42  
43 3. **Johnson NJ**, Backlund E, Sorlie PD, et al. Marital status and mortality: The  
44 national longitudinal mortality study. *Ann Epidemiol.* 2000; **10**:224-238.  
45  
46 4. **Shor E**, Roelfs DJ, Curreli M, et al. Widowhood and mortality: A meta-analysis  
47  
48  
49

- 1  
2  
3  
4  
5  
6  
7  
8  
9 and meta-regression. *Demography*. 2012; **49**:575-606.
- 10  
11 5. **Manor O**, Eisenbach Z. Mortality after spousal loss: Are there socio-  
12 demographic differences? *Soc Sci Med*. 2003; **56**:405-413.
- 13  
14 6. **Martikainen P**, Valkonen T. Mortality after the death of a spouse: rates and  
15 causes of death in a large Finnish cohort. *Am J Public Health*. 1996; **86**:1087-  
16 1093.
- 17  
18 7. **Espinosa J**, Evans WN. Heightened mortality after the death of a spouse:  
19 marriage protection or marriage selection? *J Health Econ*. 2008; **27**:1326-1342.
- 20  
21 8. **Mineau G**, Smith K, Bean L. Historical trends of survival among widows and  
22 widowers. *Soc Sci Med*. 2002; **54**:245-254.
- 23  
24 9. **Helsing KJ**, Szklo M, Comstock GW. Factors associated with mortality after  
25 widowhood. *Am J Public Health*. 1981a; **71**:802-809.
- 26  
27 10. **Stroebe W**, Stroebe MS, Abakoumkin G. Does differential social support cause  
28 sex differences in bereavement outcome? *J Commun Appl Soc Psychol*. 1999;  
29 **9**:1-12.
- 30  
31 11. **Stroebe MS**, Stroebe W, Schut H. Gender differences in adjustment to  
32 bereavement: an empirical and theoretical review. *Rev Gen Psychol*. 2001; **5**:62-  
33 83.
- 34  
35 12. **Hostetler JA**. *Amish society*. 4<sup>th</sup> ed. The Johns Hopkins University Press, MD;  
36 1993.
- 37  
38 13. **Iwasaki M**, Otani T, Sunaga R, et al. Social networks and mortality based on the  
39 Komo-Ise Cohort Study in Japan. *Int J Epidemiol*. 2002; **31**:1208-1218.
- 40  
41  
42  
43  
44  
45  
46  
47  
48  
49  
50

1  
2  
3  
4  
5  
6  
7  
8  
9  
10  
11  
12  
13  
14  
15  
16  
17  
18  
19  
20  
21  
22  
23  
24  
25  
26  
27  
28  
29  
30  
31  
32  
33  
34  
35  
36  
37  
38  
39  
40  
41  
42  
43  
44  
45  
46  
47  
48  
49  
50  
51  
52  
53  
54  
55  
56  
57  
58  
59  
60

- 1  
2  
3  
4  
5  
6  
7  
8  
9 14. **Agarwala R**, Biesecker LG., Hopkins KA, et al. Software for constructing and  
10 verifying pedigrees within large genealogies and an application to the old order  
11 Amish of Lancaster County. *Genome Res.* 1998; **8**:211-221.  
12  
13  
14 15. **Mitchell BD**, Lee W-J, Tolea M, et al. Living the good life? Mortality and  
15 hospital utilization patterns in the Lancaster County Amish. *PLoS ONE.* 2012;  
16 7:e51560.  
17  
18  
19 16. **Smith KR**, Zick CD. Risk of mortality following widowhood: Age and sex  
20 differences by mode of death. *Soc Biol.* 1996; **43**:59-71.  
21  
22  
23 17. **R Development Core Team.** R: *A language and environment for statistical*  
24 *computing.* Vienna, Austria: R Foundation for Statistical Computing; 2011.  
25  
26 URL <http://www.R-project.org/>  
27  
28  
29 18. **Therneau TM**, Grambsch PT. *Modeling Survival Data: Extending the Cox Model*  
30 *Statistics for Biology and Health.* New York, NY: Springer; 2000.  
31  
32  
33 19. **Tableman M**, Kim JS. *Survival Analysis Using S: Analysis of Time- to-Event Data.*  
34 1<sup>st</sup> ed. New York, NY: Texts in Statistical Science, Chapman and Hall/CRC; 2004.  
35  
36  
37 20. **Lichtenstein P**, Gatz M, Berg S. A twin study of mortality after spousal bereavement.  
38 *Psychol Med.* 1998; **28**:635-643.  
39  
40  
41 21. **Mendes De Leon CF**, Kasl SV, Jacobs S. Widowhood and mortality risk in a  
42 community sample of the elderly: A prospective study. *J Clin Epidemiol.* 1993;  
43 46:519-527.  
44  
45  
46 22. **Peritz E**, Bialik O, Groen JJ. Mortality by marital status in the Jewish population  
47 of Israel. *J Chronic Dis.* 1967; **20**:823-828.  
48  
49

- 1  
2  
3  
4  
5  
6  
7  
8  
9 **23-Hart CL**, Hole DJ, Lawlor DA, et al. Effect of conjugal bereavement on mortality  
10 of the bereaved spouse in participants of the Renfrew/Paisley Study. *J Epidemiol*  
11 *Community Health*. 2007; **61**:455-460.
- 14 ~~24-23. **Hkeda A**, Iso H, Toyoshima H, et al. Marital status and mortality among~~  
15 ~~Japanese men and women: The Japan Collaborative Cohort Study. *BMC Public*~~  
16 ~~*Health*. 2007; **7**:73.~~
- 21 ~~25-24. **Diamond LM**. Contributions of psychophysiology to research on adult~~  
22 ~~attachment: review and recommendations. *Pers Soc Psychol Rev*. 2001; **5**:276-~~  
23 ~~295.~~
- 26 ~~26-25. **Antonucci TC**, Akiyama H. An examination of sex differences in social~~  
27 ~~support among older men and women. *Sex Roles*. 1987; **17**:737-749.~~
- 30 ~~27-26. **Newsom JT**, Schulz R. Social support as a mediator in the relation~~  
31 ~~between functional status and quality of life in older adults. *Psychol Aging*. 1996;~~  
32 ~~**11**:34-44.~~

Formatted: Don't adjust space between Latin and Asian text, Don't adjust space between Asian text and numbers

## FIGURE LEGENDS

Figure 1. A flow diagram that represents all the steps performed for filtering 10,892 couples from total 136,213 couples available in AGDB. In the flow diagram, each couple is counted as excluded only once, even if multiple exclusion criteria apply. "Unknown spouse" refers to entries in the AGDB relationship table in which at least one parent is unknown; almost all of these entries are for adopted children for whom at least one of the biological parents is unknown. Because AGDB is used primarily in genetic studies (unlike this study), the distinction between biological and adoptive relationships is stored. "Birth year too late" means that the birth year of the husband or wife is known and is > 1901. "Dates not recognized by R" are invalid dates such as the 31st of June, which got into AGDB due to errors in the original sources. "Implausible birth or death dates" refers to a few individuals who are shown as married but have lifespans of less than 10 years likely due to typos in the birth year in the original sources.

~~Figure 1. A flow diagram which represents all the steps performed for filtering 15,611 couples from total 136,213 couples available in AGDB. In the flow diagram, each couple is counted as excluded only once, even if multiple exclusion criteria apply. "Unknown spouse" refers to entries in the AGDB relationship table in which at least one parent is unknown; almost all of these entries are for adopted children for whom at least one of the biological parents is unknown. Because AGDB is used primarily in genetic studies (unlike this study), the distinction between biological and adoptive relationships is stored. "Birth year too late" means that~~

1  
2  
3  
4  
5  
6  
7  
8  
9 the birth year of the husband is known and is  $> 1925$ . “Dates not recognized by  
10 R” are invalid dates such as the 31st of June, which got into AGDB due to errors  
11 in the original sources. “Implausible birth or death dates” refers to a few  
12 individuals who are shown as married but have lifespans of less than 10 years  
13 likely due to typos in the birth year in the original sources.  
14  
15  
16  
17  
18

19 Figure 2. Hazard ratios of widowed husbands and wives versus their married  
20 counterparts (design provided in Table 2a); \* and \*\* on the top of the blocks  
21 represent significance of hazard ratios with p-value  $< 0.05$  and p-value  $< 0.001$ ,  
22 respectively. ~~Figure 2. Hazard ratios of widowed husbands and wives versus their~~  
23 ~~married counterparts (design provided in Table 2a).~~  
24  
25  
26  
27

28 Figure 3. Hazard ratios of widowed husbands and wives versus their married  
29 counterparts according to age at widowhood (design provided in Table 2b);  
30 NSC1: Number of Surviving Children (3-6 vs  $\leq 2$ ); NSC2: Number of Surviving  
31 Children ( $>6$  vs  $\leq 2$ ); \* and \*\* on the top of the blocks represent significance of  
32 hazard ratios with p-value  $< 0.05$  and p-value  $< 0.001$ , respectively. ~~Figure 3.~~  
33 ~~Hazard ratios of widowed husbands and wives versus their married counterparts~~  
34 ~~according to age at widowhood. (design provided in Table 2b).~~  
35  
36  
37  
38  
39  
40  
41

42 Figure 4. Hazard ratios of widowed husbands and wives versus their married  
43 counterparts according to time since bereavement (months) (design provided in  
44 Table 2c); \* and \*\* on the top of the blocks represent significance of hazard ratios  
45 with p-value  $< 0.05$  and p-value  $< 0.001$ , respectively. ~~Figure 4. Hazard ratios of~~  
46 ~~widowed husbands and wives versus their married counterparts according to time~~  
47  
48  
49  
50

1  
2  
3  
4  
5  
6  
7  
8  
9  
10  
11  
12  
13  
14  
15  
16  
17  
18  
19  
20  
21  
22  
23  
24  
25  
26  
27  
28  
29  
30  
31  
32  
33  
34  
35  
36  
37  
38  
39  
40  
41  
42  
43  
44  
45  
46  
47  
48  
49  
50  
51  
52  
53  
54  
55  
56  
57  
58  
59  
60

since bereavement (months). (design provided in Table 2c).

For peer review only



TABLES

Table 1: Characteristics of 10,892 spouse pairs according to birth cohort of husband  
 1: Characteristics of 15,611 spouse pairs according to birth cohort of husband

|                                                 | Cohorts    |            |            |            |
|-------------------------------------------------|------------|------------|------------|------------|
|                                                 | Pre-1850   | 1850-1875  | 1876-1900  | 1901-1925  |
| Number of couples                               | 3711       | 3210       | 4466       | 4224       |
| Number (%) of wives out surviving their husband | 2043(55.0) | 1661(51.7) | 2360(53.0) | 2439(57.7) |
| Number (%) of husbands out surviving their wife | 1668(45.0) | 1549(48.3) | 2106(47.0) | 1785(42.3) |
| Mean husband age at widowhood                   | 63.0       | 59.8       | 62.2       | 67.9       |
| Mean wife age at widowhood                      | 62.0       | 62.8       | 66.5       | 69.6       |
| Mean widowed husband survival in years          | 14.4       | 18.3       | 18.6       | 15.0       |
| Mean widowed wife survival in years             | 15.3       | 16.0       | 17.0       | 15.1       |
| Mean husband age at death                       | 71.1       | 72.0       | 74.6       | 76.2       |
| Mean wife age at death                          | 69.6       | 68.5       | 72.7       | 77.0       |
| Mean age difference husband-wife                | 3.4        | 2.8        | 2.1        | 1.3        |
| Mean number of children                         | 5.4        | 5.3        | 5.3        | 5.8        |
| Number (%) of widowed husbands remarried        | 238(14.2)  | 404(26.0)  | 13(33.8)   | 588(33.0)  |
| Number (%) of widowed wives remarried           | 58(2.8)    | 140(8.4)   | 221(9.4)   | 194(8.0)   |

| Cohorts                                         | Pre-1850   | 1850-1875  | 1876-1900  |
|-------------------------------------------------|------------|------------|------------|
| Number of couples                               | 3711       | 3210       | 3971       |
| Number (%) of wives out surviving their husband | 2043(55.0) | 1661(51.7) | 2043(51.4) |
| Number (%) of husbands out surviving their wife | 1668(45.0) | 1549(48.3) | 1928(48.2) |
| Mean husband age at widowhood                   | 63.0       | 59.8       | 62.2       |
| Mean wife age at widowhood                      | 62.0       | 62.8       | 66.9       |
| Mean widowed husband survival in years          | 14.4       | 18.3       | 18.4       |
| Mean widowed wife survival in years             | 15.3       | 16.0       | 16.6       |
| Mean husband age at death                       | 71.1       | 72.0       | 74.6       |
| Mean wife age at death                          | 69.6       | 68.5       | 72.6       |

Formatted ... [1]  
 Formatted ... [2]  
 Formatted ... [3]  
 Formatted ... [4]  
 Formatted: Font: Times New Roman, 12 pt, Font color: Auto  
 Formatted: Font: Times New Roman, 12 pt, Font color: Auto  
 Formatted ... [5]  
 Formatted ... [6]  
 Formatted ... [7]  
 Formatted ... [8]  
 Formatted: Font: Font color: Auto  
 Formatted ... [9]  
 Formatted ... [10]  
 Formatted ... [11]  
 Formatted ... [12]  
 Formatted ... [13]  
 Formatted ... [14]  
 Formatted ... [15]  
 Formatted ... [16]  
 Formatted ... [17]  
 Formatted ... [18]  
 Formatted ... [19]  
 Formatted ... [20]  
 Formatted ... [21]  
 Formatted ... [22]  
 Formatted ... [23]  
 Formatted ... [24]  
 Formatted ... [25]  
 Formatted ... [26]  
 Formatted ... [27]  
 Formatted ... [28]  
 Formatted ... [29]  
 Formatted ... [30]  
 Formatted ... [31]  
 Formatted ... [32]  
 Formatted ... [33]  
 Formatted ... [34]  
 Formatted ... [35]  
 Formatted ... [36]

|                                          |           |           |           |
|------------------------------------------|-----------|-----------|-----------|
| Mean age difference husband-wife         | 3.4       | 2.8       | 2.0       |
| Mean number of children                  | 5.4       | 5.3       | 5.3       |
| Number (%) of widowed husbands remarried | 238(14.2) | 404(26.0) | 648(33.6) |
| Number (%) of widowed wives remarried    | 58(2.8)   | 140(8.4)  | 180(8.8)  |

Table 2a-c. The three tables below illustrate encodings for different CPH designs to test for the bereavement effect, following the general syntax of CPH table designs recommended in (18). See example description in Material and Methods.

Table 2a: Data structure for Cox Proportional Hazard model that does not estimate the effect for different ages, but instead estimates only widowed vs. non-widowed.

| ID | start | stop                 | event | W | R | C |
|----|-------|----------------------|-------|---|---|---|
| 1  | 0     | 47(age at widowhood) | 0     | 0 | 0 | 3 |
| 1  | 47    | 63(age at death)     | 1     | 1 | 1 | 3 |
| 2  | 0     | 60(age at widowhood) | 0     | 0 | 0 | 6 |
| 2  | 60    | 85(age at death)     | 1     | 1 | 0 | 6 |
| 3  | 0     | 59(age at death)     | 1     | 0 | 0 | 4 |

Table 2b: Data structure for Cox Proportional Hazard model that estimates association between widowhood at given ages and mortality.

| ID | start | stop | event | W <sub>&lt;45</sub> | W <sub>45-54</sub> | W <sub>55-64</sub> | W <sub>65-74</sub> | W <sub>75+</sub> | R | C |
|----|-------|------|-------|---------------------|--------------------|--------------------|--------------------|------------------|---|---|
| 1  | 0     | 47   | 0     | 0                   | 0                  | 0                  | 0                  | 0                | 0 | 3 |
| 1  | 47    | 63   | 1     | 0                   | 1                  | 0                  | 0                  | 0                | 1 | 3 |
| 2  | 0     | 60   | 0     | 0                   | 0                  | 0                  | 0                  | 0                | 0 | 6 |
| 2  | 60    | 85   | 1     | 0                   | 0                  | 1                  | 0                  | 0                | 0 | 6 |
| 3  | 0     | 59   | 1     | 0                   | 0                  | 0                  | 0                  | 0                | 0 | 4 |

Table 2c: Data structure for Cox Proportional Hazard model that estimates association between widowhood with respect to time since bereavement and mortality. Start and Stop columns are in years and Time Since Bereavement (TSB) columns are in months.

| ID              | start | stop | event | TSB <sub>0-6</sub> | TSB <sub>7-12</sub> | TSB <sub>13-24</sub> | TSB <sub>25-36</sub> | TSB <sub>37-48</sub> | TSB <sub>49-60</sub> | TSB <sub>&gt;60</sub> |
|-----------------|-------|------|-------|--------------------|---------------------|----------------------|----------------------|----------------------|----------------------|-----------------------|
| ID <sub>1</sub> | 0     | 47   | 0     | 0                  | 0                   | 0                    | 0                    | 0                    | 0                    | 0                     |
| ID <sub>1</sub> | 47    | 47.5 | 0     | 1                  | 0                   | 0                    | 0                    | 0                    | 0                    | 0                     |
| ID <sub>1</sub> | 47.5  | 48   | 0     | 0                  | 1                   | 0                    | 0                    | 0                    | 0                    | 0                     |
| ID <sub>1</sub> | 48    | 49   | 0     | 0                  | 0                   | 1                    | 0                    | 0                    | 0                    | 0                     |
| ID <sub>1</sub> | 49    | 50   | 0     | 0                  | 0                   | 0                    | 1                    | 0                    | 0                    | 0                     |
| ID <sub>1</sub> | 50    | 51   | 0     | 0                  | 0                   | 0                    | 0                    | 1                    | 0                    | 0                     |
| ID <sub>1</sub> | 51    | 52   | 0     | 0                  | 0                   | 0                    | 0                    | 0                    | 1                    | 0                     |
| ID <sub>1</sub> | 52    | 63   | 1     | 0                  | 0                   | 0                    | 0                    | 0                    | 0                    | 1                     |
| ID <sub>2</sub> | 0     | 60   | 0     | 0                  | 0                   | 0                    | 0                    | 0                    | 0                    | 0                     |
| ID <sub>2</sub> | 60    | 60.5 | 0     | 1                  | 0                   | 0                    | 0                    | 0                    | 0                    | 0                     |
| ID <sub>2</sub> | 60.5  | 61   | 0     | 0                  | 1                   | 0                    | 0                    | 0                    | 0                    | 0                     |
| ID <sub>2</sub> | 61    | 62   | 0     | 0                  | 0                   | 1                    | 0                    | 0                    | 0                    | 0                     |
| ID <sub>2</sub> | 62    | 63   | 0     | 0                  | 0                   | 0                    | 1                    | 0                    | 0                    | 0                     |
| ID <sub>2</sub> | 63    | 64   | 0     | 0                  | 0                   | 0                    | 0                    | 1                    | 0                    | 0                     |
| ID <sub>2</sub> | 64    | 65   | 0     | 0                  | 0                   | 0                    | 0                    | 0                    | 1                    | 0                     |
| ID <sub>2</sub> | 65    | 85   | 1     | 0                  | 0                   | 0                    | 0                    | 0                    | 0                    | 1                     |
| ID <sub>3</sub> | 0     | 59   | 1     | 0                  | 0                   | 0                    | 0                    | 0                    | 0                    | 0                     |

1  
2  
3  
4  
5  
6  
7  
8  
9  
10  
11  
12  
13  
14  
15  
16  
17  
18  
19  
20  
21  
22  
23  
24  
25  
26  
27  
28  
29  
30  
31  
32  
33  
34  
35  
36  
37  
38  
39  
40  
41  
42  
43  
44  
45  
46  
47  
48  
49  
50  
51  
52  
53  
54  
55  
56  
57  
58  
59  
60

**Page 34: [1] Formatted** ncbi user 11/4/2013 10:54:00 AM

Font color: Auto

**Page 34: [1] Formatted** ncbi user 11/4/2013 10:54:00 AM

Font color: Auto

**Page 34: [2] Formatted** ncbi user 11/4/2013 10:54:00 AM

Font: Font color: Auto

**Page 34: [2] Formatted** ncbi user 11/4/2013 10:54:00 AM

Font: Font color: Auto

**Page 34: [3] Formatted** ncbi user 11/4/2013 10:54:00 AM

Font: Font color: Auto

**Page 34: [3] Formatted** ncbi user 11/4/2013 10:54:00 AM

Font: Font color: Auto

**Page 34: [4] Formatted** ncbi user 11/4/2013 10:54:00 AM

Font: Font color: Auto

**Page 34: [4] Formatted** ncbi user 11/4/2013 10:54:00 AM

Font: Font color: Auto

**Page 34: [5] Formatted** ncbi user 11/4/2013 10:54:00 AM

Font: Font color: Auto

**Page 34: [5] Formatted** ncbi user 11/4/2013 10:54:00 AM

Font: Font color: Auto

**Page 34: [6] Formatted** ncbi user 11/4/2013 10:54:00 AM

Font: Font color: Auto

**Page 34: [6] Formatted** ncbi user 11/4/2013 10:54:00 AM

Font: Font color: Auto

**Page 34: [7] Formatted** ncbi user 11/4/2013 10:54:00 AM

Font: Font color: Auto

For peer review only - <http://bmjopen.bmj.com/site/about/guidelines.xhtml>

**Page 34: [7] Formatted** ncbi user 11/4/2013 10:54:00 AM

Font: Font color: Auto

1  
2  
3  
4  
5  
6  
7  
8  
9  
10  
11  
12 **Page 34: [8] Formatted** ncbi user 11/4/2013 10:54:00 AM

13 Font: Font color: Auto

14  
15  
16 **Page 34: [8] Formatted** ncbi user 11/4/2013 10:54:00 AM

17 Font: Font color: Auto

18  
19  
20 **Page 34: [9] Formatted** ncbi user 11/4/2013 10:54:00 AM

21 Font: Font color: Auto

22  
23  
24 **Page 34: [9] Formatted** ncbi user 11/4/2013 10:54:00 AM

25 Font: Font color: Auto

26  
27  
28 **Page 34: [10] Formatted** ncbi user 11/4/2013 10:54:00 AM

29 Font: Font color: Auto

30  
31  
32 **Page 34: [10] Formatted** ncbi user 11/4/2013 10:54:00 AM

33 Font: Font color: Auto

34  
35  
36 **Page 34: [11] Formatted** ncbi user 11/4/2013 10:54:00 AM

37 Font: Font color: Auto

38  
39  
40 **Page 34: [11] Formatted** ncbi user 11/4/2013 10:54:00 AM

41 Font: Font color: Auto

42  
43  
44 **Page 34: [12] Formatted** ncbi user 11/4/2013 10:54:00 AM

45 Font: Font color: Auto

46  
47  
48 **Page 34: [12] Formatted** ncbi user 11/4/2013 10:54:00 AM

49 Font: Font color: Auto

50  
51  
52 **Page 34: [13] Formatted** ncbi user 11/4/2013 10:54:00 AM

53 Font: Font color: Auto

54  
55  
56 **Page 34: [13] Formatted** ncbi user 11/4/2013 10:54:00 AM

57 Font: Font color: Auto

58  
59  
60 **Page 34: [14] Formatted** ncbi user 11/4/2013 10:54:00 AM

Font color: Auto

For peer review only - <http://bmjopen.bmj.com/site/about/guidelines.xhtml>

**Page 34: [14] Formatted** ncbi user 11/4/2013 10:54:00 AM

Font color: Auto

1  
2  
3  
4  
5  
6  
7  
8  
9  
10  
11  
12 **Page 34: [15] Formatted** **ncbi user** **11/4/2013 10:54:00 AM**

13 Font color: Auto

14  
15  
16 **Page 34: [15] Formatted** **ncbi user** **11/4/2013 10:54:00 AM**

17 Font color: Auto

18  
19  
20 **Page 34: [16] Formatted** **ncbi user** **11/4/2013 10:54:00 AM**

21 Font color: Auto

22  
23  
24 **Page 34: [16] Formatted** **ncbi user** **11/4/2013 10:54:00 AM**

25 Font color: Auto

26  
27  
28 **Page 34: [17] Formatted** **ncbi user** **11/4/2013 10:54:00 AM**

29 Font: Font color: Auto

30  
31  
32 **Page 34: [17] Formatted** **ncbi user** **11/4/2013 10:54:00 AM**

33 Font: Font color: Auto

34  
35  
36 **Page 34: [18] Formatted** **ncbi user** **11/4/2013 10:54:00 AM**

37 Font color: Auto

38  
39  
40 **Page 34: [18] Formatted** **ncbi user** **11/4/2013 10:54:00 AM**

41 Font color: Auto

42  
43  
44 **Page 34: [19] Formatted** **ncbi user** **11/4/2013 10:54:00 AM**

45 Font color: Auto

46  
47  
48 **Page 34: [19] Formatted** **ncbi user** **11/4/2013 10:54:00 AM**

49 Font color: Auto

50  
51  
52 **Page 34: [20] Formatted** **ncbi user** **11/4/2013 10:54:00 AM**

53 Font color: Auto

54  
55  
56 **Page 34: [20] Formatted** **ncbi user** **11/4/2013 10:54:00 AM**

57 Font color: Auto

58  
59  
60 **Page 34: [21] Formatted** **ncbi user** **11/4/2013 10:54:00 AM**

Font: Font color: Auto

For peer review only - <http://bmjopen.bmj.com/site/about/guidelines.xhtml>

**Page 34: [21] Formatted** **ncbi user** **11/4/2013 10:54:00 AM**

Font: Font color: Auto

1  
2  
3  
4  
5  
6  
7  
8  
9  
10  
11  
12 **Page 34: [22] Formatted** **ncbi user** **11/4/2013 10:54:00 AM**

13 Font color: Auto

14  
15  
16 **Page 34: [22] Formatted** **ncbi user** **11/4/2013 10:54:00 AM**

17 Font color: Auto

18  
19  
20 **Page 34: [23] Formatted** **ncbi user** **11/4/2013 10:54:00 AM**

21 Font color: Auto

22  
23  
24 **Page 34: [23] Formatted** **ncbi user** **11/4/2013 10:54:00 AM**

25 Font color: Auto

26  
27  
28 **Page 34: [24] Formatted** **ncbi user** **11/4/2013 10:54:00 AM**

29 Font color: Auto

30  
31  
32 **Page 34: [24] Formatted** **ncbi user** **11/4/2013 10:54:00 AM**

33 Font color: Auto

34  
35  
36 **Page 34: [25] Formatted** **ncbi user** **11/4/2013 10:54:00 AM**

37 Font: Font color: Auto

38  
39  
40 **Page 34: [25] Formatted** **ncbi user** **11/4/2013 10:54:00 AM**

41 Font: Font color: Auto

42  
43  
44 **Page 34: [26] Formatted** **ncbi user** **11/4/2013 10:54:00 AM**

45 Font color: Auto

46  
47  
48 **Page 34: [26] Formatted** **ncbi user** **11/4/2013 10:54:00 AM**

49 Font color: Auto

50  
51  
52 **Page 34: [27] Formatted** **ncbi user** **11/4/2013 10:54:00 AM**

53 Font color: Auto

54  
55  
56 **Page 34: [27] Formatted** **ncbi user** **11/4/2013 10:54:00 AM**

57 Font color: Auto

58  
59  
60 **Page 34: [28] Formatted** **ncbi user** **11/4/2013 10:54:00 AM**

Font color: Auto

For peer review only - <http://bmjopen.bmj.com/site/about/guidelines.xhtml>

**Page 34: [28] Formatted** **ncbi user** **11/4/2013 10:54:00 AM**

Font color: Auto

1  
2  
3  
4  
5  
6  
7  
8  
9  
10  
11  
12  
13  
14  
15  
16  
17  
18  
19  
20  
21  
22  
23  
24  
25  
26  
27  
28  
29  
30  
31  
32  
33  
34  
35  
36  
37  
38  
39  
40  
41  
42  
43  
44  
45  
46  
47  
48  
49  
50  
51  
52  
53  
54  
55  
56  
57  
58  
59  
60

**Page 34: [29] Formatted** ncbi user 11/4/2013 10:54:00 AM

Font: Font color: Auto

**Page 34: [29] Formatted** ncbi user 11/4/2013 10:54:00 AM

Font: Font color: Auto

**Page 34: [30] Formatted** ncbi user 11/4/2013 10:54:00 AM

Font color: Auto

**Page 34: [30] Formatted** ncbi user 11/4/2013 10:54:00 AM

Font color: Auto

**Page 34: [31] Formatted** ncbi user 11/4/2013 10:54:00 AM

Font color: Auto

**Page 34: [31] Formatted** ncbi user 11/4/2013 10:54:00 AM

Font color: Auto

**Page 34: [32] Formatted** ncbi user 11/4/2013 10:54:00 AM

Font color: Auto

**Page 34: [32] Formatted** ncbi user 11/4/2013 10:54:00 AM

Font color: Auto

**Page 34: [33] Formatted** ncbi user 11/4/2013 10:54:00 AM

Font: Font color: Auto

**Page 34: [33] Formatted** ncbi user 11/4/2013 10:54:00 AM

Font: Font color: Auto

**Page 34: [34] Formatted** ncbi user 11/4/2013 10:54:00 AM

Font color: Auto

**Page 34: [34] Formatted** ncbi user 11/4/2013 10:54:00 AM

Font color: Auto

**Page 34: [35] Formatted** ncbi user 11/4/2013 10:54:00 AM

Font color: Auto

For peer review only - <http://bmjopen.bmj.com/site/about/guidelines.xhtml>

**Page 34: [35] Formatted** ncbi user 11/4/2013 10:54:00 AM

Font color: Auto



1  
2  
3  
4  
5  
6  
7  
8  
9  
10  
11  
12 **Page 34: [36] Formatted** **ncbi user** **11/4/2013 10:54:00 AM**

13 Font color: Auto

14  
15  
16 **Page 34: [36] Formatted** **ncbi user** **11/4/2013 10:54:00 AM**

17 Font color: Auto

18  
19  
20  
21  
22  
23  
24  
25  
26  
27  
28  
29  
30  
31  
32  
33  
34  
35  
36  
37  
38  
39  
40  
41  
42  
43  
44  
45  
46  
47  
48  
49  
50  
51  
52  
53  
54  
55  
56  
57  
58  
59  
60

For peer review only

1  
2  
3  
4  
5  
6  
7  
8  
9  
10  
11  
12  
13  
14  
15  
16  
17  
18  
19  
20  
21  
22  
23  
24  
25  
26  
27  
28  
29  
30  
31  
32  
33  
34  
35  
36  
37  
38  
39  
40  
41  
42  
43  
44  
45  
46  
47  
48  
49  
50  
51  
52  
53  
54  
55  
56  
57  
58  
59  
60

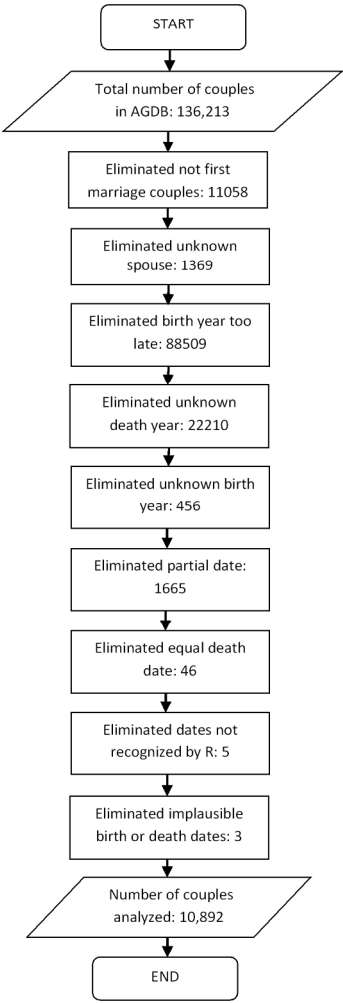

173x236mm (300 x 300 DPI)

1  
2  
3  
4  
5  
6  
7  
8  
9  
10  
11  
12  
13  
14  
15  
16  
17  
18  
19  
20  
21  
22  
23  
24  
25  
26  
27  
28  
29  
30  
31  
32  
33  
34  
35  
36  
37  
38  
39  
40  
41  
42  
43  
44  
45  
46  
47  
48  
49  
50  
51  
52  
53  
54  
55  
56  
57  
58  
59  
60

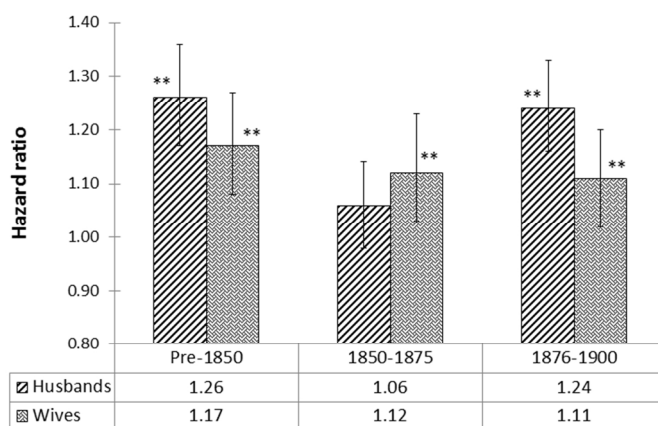

173x233mm (300 x 300 DPI)

1  
2  
3  
4  
5  
6  
7  
8  
9  
10  
11  
12  
13  
14  
15  
16  
17  
18  
19  
20  
21  
22  
23  
24  
25  
26  
27  
28  
29  
30  
31  
32  
33  
34  
35  
36  
37  
38  
39  
40  
41  
42  
43  
44  
45  
46  
47  
48  
49  
50  
51  
52  
53  
54  
55  
56  
57  
58  
59  
60

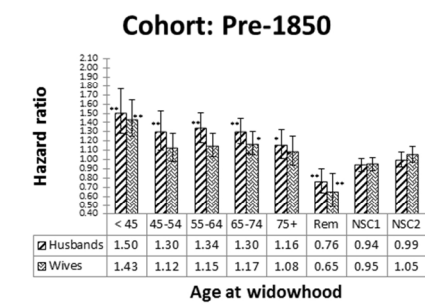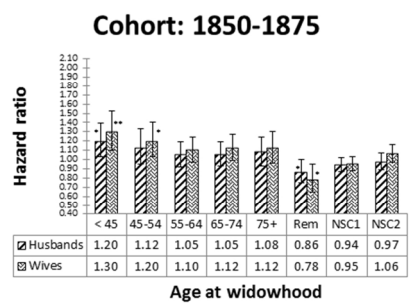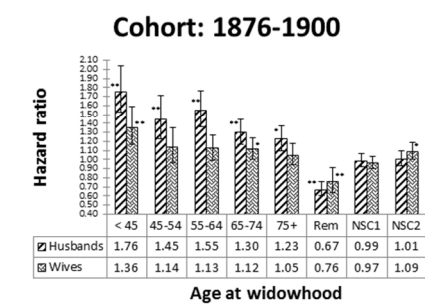

173x233mm (300 x 300 DPI)

1  
2  
3  
4  
5  
6  
7  
8  
9  
10  
11  
12  
13  
14  
15  
16  
17  
18  
19  
20  
21  
22  
23  
24  
25  
26  
27  
28  
29  
30  
31  
32  
33  
34  
35  
36  
37  
38  
39  
40  
41  
42  
43  
44  
45  
46  
47  
48  
49  
50  
51  
52  
53  
54  
55  
56  
57  
58  
59  
60

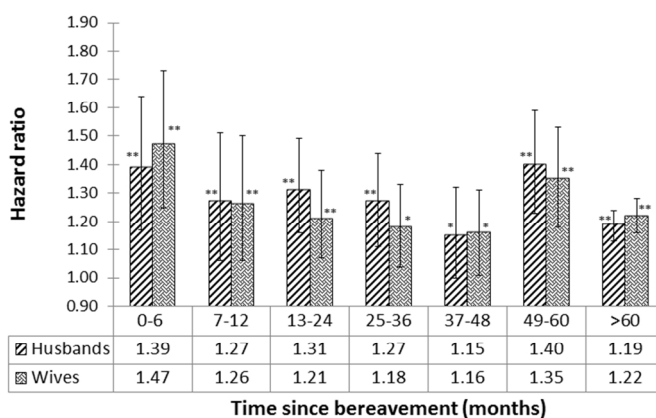

Figure 4. Hazard ratios of widowed husbands and wives versus their married counterparts according to time since bereavement (months) (design provided in Table 2c); \* and \*\* on the top of the blocks represent significance of hazard ratios with p-value < 0.05 and p-value < 0.001, respectively.  
173x233mm (300 x 300 DPI)

Table S1: Wald statistics associated with models that are used to study the association between widowhood and mortality.

| Cohorts                 | Pre-1850           | 1850-1875        | 1876-1900          |
|-------------------------|--------------------|------------------|--------------------|
| Husbands                | 38.2 <sup>**</sup> | 5.9 <sup>*</sup> | 38.0 <sup>**</sup> |
| Wives                   | 15.2 <sup>**</sup> | 6.9 <sup>*</sup> | 6.8 <sup>*</sup>   |
| * P<0.05 and ** P<0.001 |                    |                  |                    |

Table S2: Wald statistics associated with models that are used to study the association between timing of widowhood and mortality.

| Cohorts                 | Pre-1850           | 1850-1875          | 1876-1900          |
|-------------------------|--------------------|--------------------|--------------------|
| Husbands                | 57.2 <sup>**</sup> | 15.8 <sup>*</sup>  | 87.7 <sup>**</sup> |
| Wives                   | 39.8 <sup>**</sup> | 20.3 <sup>**</sup> | 28.9 <sup>**</sup> |
| * P<0.05 and ** P<0.001 |                    |                    |                    |

Table S3: Wald statistics associated with models that are used to study the association between time since bereavement and mortality.

|            |                    |
|------------|--------------------|
| Husbands   | 94.6 <sup>**</sup> |
| Wives      | 84.3 <sup>**</sup> |
| ** P<0.001 |                    |



## Analysis of the Bereavement Effect After the Death of a Spouse in the Amish

|                                 |                                                                                                                                                                                                                                                                                                                                                                                                                                                                                                                                                                                                                                                                                                                                                                                                                                                                                                                                                                                                                      |
|---------------------------------|----------------------------------------------------------------------------------------------------------------------------------------------------------------------------------------------------------------------------------------------------------------------------------------------------------------------------------------------------------------------------------------------------------------------------------------------------------------------------------------------------------------------------------------------------------------------------------------------------------------------------------------------------------------------------------------------------------------------------------------------------------------------------------------------------------------------------------------------------------------------------------------------------------------------------------------------------------------------------------------------------------------------|
| Journal:                        | <i>BMJ Open</i>                                                                                                                                                                                                                                                                                                                                                                                                                                                                                                                                                                                                                                                                                                                                                                                                                                                                                                                                                                                                      |
| Manuscript ID:                  | bmjopen-2013-003670.R3                                                                                                                                                                                                                                                                                                                                                                                                                                                                                                                                                                                                                                                                                                                                                                                                                                                                                                                                                                                               |
| Article Type:                   | Research                                                                                                                                                                                                                                                                                                                                                                                                                                                                                                                                                                                                                                                                                                                                                                                                                                                                                                                                                                                                             |
| Date Submitted by the Author:   | 06-Dec-2013                                                                                                                                                                                                                                                                                                                                                                                                                                                                                                                                                                                                                                                                                                                                                                                                                                                                                                                                                                                                          |
| Complete List of Authors:       | Seifter, Ari; University of Maryland School of Medicine, Department of Medicine and Program for Personalized and Genomic Medicine<br>Singh, Sarabdeep; National Institutes of Health, NCBI/NLM<br>McArdle, Patrick; University of Maryland School of Medicine, Department of Medicine and Program for Personalized and Genomic Medicine<br>Ryan, Kathleen; University of Maryland School of Medicine, Department of Medicine and Program for Personalized and Genomic Medicine<br>Shuldiner, Alan; University of Maryland School of Medicine, Department of Medicine and Program for Personalized and Genomic Medicine; Veterans Administration Medical Center, Geriatric Research and Education Clinical Center<br>Mitchell, Braxton; University of Maryland School of Medicine, Department of Medicine and Program for Personalized and Genomic Medicine; Veterans Administration Medical Center, Geriatric Research and Education Clinical Center<br>Schaffer, Alejandro; National Institutes of Health, NCBI/NLM |
| <b>Primary Subject Heading</b>: | Epidemiology                                                                                                                                                                                                                                                                                                                                                                                                                                                                                                                                                                                                                                                                                                                                                                                                                                                                                                                                                                                                         |
| Secondary Subject Heading:      | Geriatric medicine, Public health, Sociology                                                                                                                                                                                                                                                                                                                                                                                                                                                                                                                                                                                                                                                                                                                                                                                                                                                                                                                                                                         |
| Keywords:                       | EPIDEMIOLOGY, GERIATRIC MEDICINE, MENTAL HEALTH, PUBLIC HEALTH                                                                                                                                                                                                                                                                                                                                                                                                                                                                                                                                                                                                                                                                                                                                                                                                                                                                                                                                                       |
|                                 |                                                                                                                                                                                                                                                                                                                                                                                                                                                                                                                                                                                                                                                                                                                                                                                                                                                                                                                                                                                                                      |

SCHOLARONE™  
Manuscripts

# Analysis of the Bereavement Effect After the Death of a Spouse in the Amish

Ari Seifter<sup>1a</sup>, Sarabdeep Singh<sup>2a</sup>, Patrick F. McArdle<sup>1</sup>, Kathleen A. Ryan<sup>1</sup>, Alan R. Shuldiner<sup>1,3</sup>, Braxton D. Mitchell<sup>1,3</sup>, Alejandro A. Schäffer<sup>2\*</sup>

<sup>1</sup>Department of Medicine and Program for Personalized and Genomic Medicine, University of Maryland School of Medicine, Baltimore, MD

<sup>2</sup>National Center for Biotechnology Information, National Library of Medicine, National Institutes of Health, DHHS, Bethesda, MD

<sup>3</sup> Geriatric Research and Education Clinical Center, Veterans Administration Medical Center, Baltimore, MD

<sup>a</sup> These authors contributed equally and should be considered aequo loco.

\*To whom correspondence should be addressed at:

Bldg. 38A, Room 6S608

NCBI/NIH

8600 Rockville Pike

Bethesda, MD 20894

e-mail: schaffer@helix.nih.gov

**Author-suggested Keywords:** bereavement effect, Amish, remarriage, social support, Cox proportional hazards, time-dependent covariate

Word Counts:

Abstract: 248

Introduction through Discussion: 3,757.



**ABSTRACT**

**Objective** This study investigates the association between bereavement and the mortality of a surviving spouse among Amish couples. We hypothesized that the bereavement effect would be relatively small in the Amish due to the unusually cohesive social structure of the Amish that might attenuate the loss of spousal support.

**Design** Population-based cohort study

**Setting** United States of America

**Participants** 10,892 Amish couples born during 1725-1900 located in Pennsylvania, Ohio, and Indiana. All the participants are deceased.

**Outcome measure** The survival time is 'age'; event is 'death'. Hazard ratios of widowed individuals with respect to gender, age at widowhood, remarriage, number of surviving children, and time since bereavement.

**Results** We observed hazard ratios for widowhood ranging from 1.06-1.26 over the study period (nearly all differences significant at  $p < 0.05$ ). Mortality risks tended to be higher in men than in women and in younger compared to older bereaved spouses. There were significantly increased mortality risks in both widows and widowers who did not remarry. We observed a higher number of surviving children to be associated with increased mortality in both males and females. Mortality risk following bereavement was higher in the first 6 months among both men and women.

**Conclusions** We conclude that bereavement effects remain apparent even in this

1  
2  
3 socially cohesive Amish community. Remarriage is associated with a significant  
4  
5 decrease in the mortality risk among Amish individuals. Contrary to results from  
6  
7 previous studies, an increase in the number of surviving children was associated  
8  
9 with decreased survival rate.  
10  
11  
12  
13  
14  
15  
16  
17  
18  
19  
20  
21  
22  
23  
24  
25  
26  
27  
28  
29  
30  
31  
32  
33  
34  
35  
36  
37  
38  
39  
40  
41  
42  
43  
44  
45  
46  
47  
48  
49  
50  
51  
52  
53  
54  
55  
56  
57  
58  
59  
60

For peer review only

## ARTICLE SUMMARY

### Article focus

- The focus of this article is to evaluate the relationship between bereavement and the mortality of a surviving spouse in the Amish population.
- We evaluated the association of bereavement and mortality of a surviving spouse with respect to gender, age at widowhood, and time since bereavement while accounting for remarriage, and number of surviving children using Cox proportional hazard models.

### Key messages

- This study shows that strong social support is not sufficient to decrease the mortality risks among Amish individuals, and therefore the support provided by the spouse is irreplaceable.
- Remarriage significantly decreases the mortality risk for both males and females.

### Strengths and limitations of this study

- Due to the availability of remarriage status of the surviving spouses, we could reproduce and quantify the decreased bereavement effect associated with remarriage.
- Due to the unavailability of data on causes of death, it was not possible to determine the relationship between differential measures of social support and certain causes of death.

- The number of surviving children was simplified to be a time independent covariate although it may change between the death of the first parent and the death of the second parent.

For peer review only

## INTRODUCTION

It has been consistently established that widowed individuals exhibit increased mortality compared to married individuals.<sup>1-4</sup> This excess mortality risk, referred to as the “bereavement effect,” is strongest in the first few years following widowhood, among men who outlive their wives, and among younger widows/widowers.<sup>2 5</sup> Factors proposed to explain this phenomenon include: the acute grief and stress of bereavement; shared environmental risk factors between spouses; marital selection; economic hardship; and loss of social support.<sup>6 7</sup>

These influences are difficult to isolate and independently assess. Several studies have shown that larger social network size and greater level of social support are generally associated with lower rates of mortality and morbidity.<sup>4</sup> In a study based on the Utah Population Database, mortality risk among widowers decreased with membership in the Church of Latter Day Saints (LDS, a.k.a. Mormon Church) and with increasing numbers of children. These factors were interpreted as proxies for social support.<sup>8</sup> Additionally, a study in Washington County, Maryland, indicated that living alone was a risk factor for increased mortality in widowed populations.<sup>9</sup> Loss of social support following the death of a spouse is generally more profound in widowers than in widows, but there is currently no empirical evidence that this difference mediates the higher mortality consistently observed among widowed husbands compared to widowed wives.<sup>10</sup>

11

The Amish maintain a cultural identity distinct from mainstream American

1  
2  
3 culture that is characterized by their traditional dress, a plain lifestyle, and non-  
4 adoption of modern technology (e.g., electricity, cars, telephones), German  
5 dialect, separate school system, and ultra-conservative Anabaptist religious  
6 practices. A central tenet of Amish culture throughout their history in the USA  
7 has been social cohesiveness with emphasis on family and community. Members  
8 of this tight-knit society have extraordinary social support from cradle to grave,  
9 including community-financing of medical costs and support during times of  
10 need. The community financing of medical costs became increasingly formalized  
11 during the 20th century to the point where it is now a formal system of self-  
12 insurance called “Amish Aid”.  
13  
14  
15  
16  
17  
18  
19  
20  
21  
22  
23  
24  
25  
26

27 To gain a different perspective on potential influences of social support on  
28 bereavement, we assessed the bereavement effect in an Amish population, whose  
29 culture is characterized by its core beliefs in community and social cohesion.  
30 Examples of the strong degree of social support within the Amish include  
31 community-managed health insurance and community ties through membership in  
32 the church, and the sharing of ultraconservative cultural beliefs and lifestyles.<sup>12</sup>  
33 We reasoned that the high level of social support in the Amish population might  
34 mitigate the bereavement effect. Previous studies used covariates such as  
35 education (homogeneous in the Amish),<sup>12</sup> health habits, remarriage, church visits,  
36 neighborhood interaction, and household size to study the relationship between  
37 bereavement and social support.<sup>4 8 13</sup>  
38  
39  
40  
41  
42  
43  
44  
45  
46  
47  
48  
49  
50  
51  
52

53 We estimated bereavement effects in widows and widowers separately, and  
54  
55

1  
2  
3 further assessed mortality risks as a function of age at widowhood and time since  
4 bereavement.<sup>2 8</sup> We used Cox proportional hazard (CPH) models to analyze the  
5 association of bereavement and mortality of widowed husbands and wives. We  
6 considered remarriage and number of surviving children as additional potential  
7 modifiers of the bereavement effect.  
8  
9  
10  
11  
12  
13

## 14 15 16 17 **MATERIAL AND METHODS**

### 18 19 **Data source**

20  
21 The Anabaptist Genealogy Database (AGDB) version 5 was used to study the  
22 effect of bereavement on the Amish population.<sup>14 15</sup> The AGDB is a  
23 computerized genealogy database of Amish and some Mennonite populations, last  
24 updated in 2010. This database includes information about the family  
25 relationships and the birth, marriage, and death dates of children of Amish  
26 individuals from North America, mostly located in Pennsylvania, Ohio, and  
27 Indiana. The "individual table" of AGDB contains information about 539,822  
28 individuals. The "relationship table" includes information about 136,213 Amish  
29 couples. An individual who is married multiple times participates in multiple  
30 relationship table entries. There are 1,369 relationship entries among the 136,213  
31 entries concerning children for whom one or both biological parents are unknown  
32 (Figure 1).  
33  
34  
35  
36  
37  
38  
39  
40  
41  
42  
43  
44  
45  
46  
47  
48  
49

50 Amish people rarely give birth out of wedlock, and a vast majority of the  
51 mating samples we used are documented as marriages in the three original sources  
52  
53  
54

1  
2  
3 from which AGDB is derived. However, there is less availability of marriage  
4 dates than birth dates; we did not wish to exclude couples with missing marriage  
5 dates. For this study, we included couples in which both spouses met four  
6 conditions: (1) they were born prior to January 1, 1901; (2) their birth and death  
7 dates were recorded; (3) they were in their first marriage; and (4) they did not die  
8 on the same day. Constraint (4) excludes couples who may have died from a  
9 shared disaster (e.g., accident). A total of 10,892 couples met the inclusion  
10 criteria. The oldest person included was born on February 14, 1725, and the  
11 youngest on December 30, 1900. See Figure 1 for how the exclusion criteria were  
12 applied.  
13  
14  
15  
16  
17  
18  
19  
20  
21  
22  
23  
24  
25

26  
27 Our data set included 10,892 couples with information on their date of birth,  
28 date of death, number of surviving children, family IDs, and remarriage status  
29 after widowhood. For some analyses, these couples were first partitioned into  
30 three cohorts based on the husband's birth year (prior to 1850 and 1850-1875) and  
31 based on both husband's and wife's birth year (1876-1900) and sex. For the time  
32 since bereavement analyses, we did not partition into cohorts because the number  
33 of widow(er)s who died within 6 months after being bereaved is small (N=291).  
34 Characteristics of these couples are shown in Table 1.  
35  
36  
37  
38  
39  
40  
41  
42  
43  
44  
45  
46

### 47 **Statistical analyses**

48  
49 Similar to several past analyses,<sup>2 8 13 16</sup> we used the Cox Proportional  
50 Hazards (CPH) model where the response variable or survival time is 'age at  
51 death' and the event is 'death'. The model is used to study the association of  
52  
53  
54  
55



1  
2  
3 widowhood and mortality rates in the surviving spouse, while adjusting for  
4 covariates such as education, health habits, age in years, number of children,  
5 and remarriage. In some of our analyses, we adjusted for remarriage and  
6 number of children as covariates; we did not adjust for education or health  
7 habits. Husbands and wives were always analyzed separately.

8  
9  
10  
11  
12  
13  
14  
15 The main covariate, widowhood, was monitored as a time-dependent  
16 covariate, by assigning a value of 1 for each time period the individual was  
17 widowed and 0 otherwise. The remarriage covariate was also a time-dependent  
18 covariate, by assigning a value 1 for the widowed period if the individual  
19 remarried and 0 otherwise. The number of surviving children was a time-  
20 independent covariate and counted at the beginning of widowhood period of the  
21 surviving spouse. The covariate was divided into three categories, as follows:  
22 0=number of surviving children is  $\leq 2$ , 1=number of surviving children is between  
23 3 and 6, and 2=number of surviving children is  $> 6$ . The categories  $\leq 2$  children, 3-  
24 6 children, and  $> 6$  children are separate. These boundaries were chosen to ensure  
25 categories that were roughly balanced in size. To evaluate any possible bias by  
26 counting the number of surviving children at the death of the first spouse, we also  
27 estimated how many couples changed categories between the death of the first  
28 spouse and the death of second spouse due to death of one or more children  
29 during the widowhood period.

30  
31  
32  
33  
34  
35  
36  
37  
38  
39  
40  
41  
42  
43  
44  
45  
46  
47  
48  
49  
50  
51 Survival analyses were performed using the R programming environment.<sup>17</sup>  
52  
53 All estimates and confidence intervals were obtained using the `coxph` function  
54

1  
2  
3 available in the `survival` package.  
4  
5

### 6 **Representation of survival data for CPH analysis**

7

8 We show below examples of how we represented the survival data for CPH  
9 analysis using a time modeling approach. To represent the survival data columns, the  
10 standard approach is to convert the couple's demographic information, date of  
11 death, date of birth, remarriage and number of surviving children into columns  
12 representing **start** time, **stop** time, **event** status, and all of the included covariates  
13 (widowhood, remarriage, and number of surviving children).<sup>18 19</sup> Here (**start**,  
14 **stop**] is an interval of risk, open on the left and closed on the right; the **event**  
15 column is set to 1 if the subject had an event (death) at time **stop** and is 0  
16 otherwise. To illustrate the subtleties, we consider a hypothetical example of  
17 three wives (ID1, ID2 and ID3) from the cohort 1850-1875.  
18  
19  
20  
21  
22  
23  
24  
25  
26  
27  
28  
29  
30  
31  
32  
33

- 34 • *ID*1: born on 01/01/1860; widowed on 01/01/1907 at age 47; got remarried;  
35 number of surviving children = 3 and eventually died on 01/01/1923 at age 63.  
36  
37  
38  
39
- 40 • *ID*2: born on 09/01/1870; widowed on 09/01/1930 at age 60; never got  
41 remarried; number of surviving children = 6 and died on 09/01/1955 at age 85.  
42  
43  
44  
45  
46  
47
- 48 • *ID*3: born on 03/01/1871; never widowed and never remarried; number of  
49 surviving children = 4 and died on 04/01/1930 at age 59.  
50  
51  
52  
53  
54

1  
2  
3 The data used for the CPH considering widowhood as a single time-  
4 dependent covariate is presented in Table 2a. The following model was used to  
5 estimate the association between widowhood and mortality.  
6  
7  
8  
9

$$10 \quad h(t) = h_0(t) \exp[\beta W]$$

11  
12 This model can be run with additional covariates and results that adjust for the  
13 ability to remarry and the number of surviving children are presented.  
14  
15  
16

### 17 **Timing of widowhood**

18  
19 The above model considers widowhood as a single time-dependent  
20 covariate, evaluating the association between mortality and being  
21 widowed. One can further ask if that association varies over the life  
22 course by considering the impact of age at widowhood on mortality.  
23  
24 We addressed this issue following the approach of Mineau et al. by  
25 adding terms for age at widowhood into the model as covariates (<45,  
26 45-54, 55-64, 65-74 and >75) to allow the hazard ratio (HR) to vary according to  
27 age at widowhood (see Table 2b).<sup>8</sup> These terms were included in the model  
28 as time-dependent dummy variables, created to represent the  
29 widowhood experience of each individual across the 5 age windows  
30 spanning the individual's age:  $W_{<45}$ ,  $W_{45-54}$ ,  $W_{55-64}$ ,  $W_{65-74}$ , and  $W_{75+}$ .  
31  
32 Further, we also addressed the impact of remarriage and number of  
33 surviving children on the mortality of Amish individuals.  
34  
35  
36  
37  
38  
39  
40  
41  
42  
43  
44  
45  
46  
47  
48  
49

50  
51 The following model can be used to estimate the association  
52 between each of the five dummy variables and mortality:  
53  
54

$$h(t) = h_0(t) \exp[\sum \beta_j W_j + \beta_6 R + \beta_7 C] \text{ with } j = 1, \dots, 5$$

where  $W_1, \dots, W_5$  dummy variables are associated with  $W_{<45}$ ,  $W_{45-54}$ ,  $W_{55-64}$ ,  $W_{65-74}$ ,  $W_{75+}$  columns provided in the Table 2b.

### **Time since bereavement**

Next, we evaluated the association between mortality and time since bereavement or widowhood. We followed the approach of Schaefer et al. by considering the following time since bereavement ranges: 0-6 months, 7-12 months, 13-24 months, 25-36 months, 37-48 months, 49-60 months and > 60 months.<sup>2</sup> This approach allowed us to estimate HR according to time since bereavement (see Table 2c). The columns  $TSB_{0-6}$ ,  $TSB_{7-12}$ , ... in Table 2c are time dependent covariates that change with the survival time associated with widowed husbands and wives. We did not account for remarriage in this analysis because of missing remarriage dates.

The following model was used to study the association between mortality and time since bereavement:

$$h(t) = h_0(t) \exp[\sum \beta_j W_j] \text{ with } j = 1, \dots, 7$$

where  $W_1, \dots, W_7$  dummy variables are associated with the  $TSB_{0-6}$ ,  $TSB_{7-12}$ ,  $TSB_{13-24}$ ,  $TSB_{25-36}$ ,  $TSB_{37-48}$ ,  $TSB_{49-60}$  and  $TSB_{>60}$  columns provided in the Table 2c.

## **RESULTS**

1  
2  
3 We initially partitioned the 10,892 couples from AGDB into three cohorts ranging  
4  
5 in size from 3,210 (husband birth year 1850-1875) to 3,971 (husband birth year  
6  
7 1876-1900). Wives were more likely to die after their husbands in all three  
8  
9 cohorts while husbands had a higher mean age at death than their wives. The  
10  
11 average age differences between the husbands and wives for all cohorts are shown  
12  
13 in Table 1. The number of remarried wives was far smaller than the number of  
14  
15 remarried husbands (n = 1,290 widowed husbands vs 378 widowed wives). The  
16  
17 number and proportion of remarried husbands and wives were increased in the  
18  
19 more contemporary cohorts (see Table 1). In contrast to other populations from  
20  
21 the 19th and early 20th centuries,<sup>4</sup> the majority of widowed husbands did not  
22  
23 remarry, making it interesting to study the effect of remarriage in the Amish  
24  
25 population.  
26  
27  
28  
29  
30

### 31 32 **Hazard Ratios**

33  
34 The overall hazard ratios (HR), and their 95% confidence intervals (CIs),  
35  
36 associated with widowhood are displayed in Figure 2 according to birth cohort.  
37  
38 The significance of these hazard ratios are indicated with the help of p-values  
39  
40 (\*:p-value<0.05 and \*\*:p-value<0.001) on the top of each block in Figure 2.  
41  
42 These hazard ratios were estimated using the CPH model and design provided in  
43  
44 Table 2a. As expected, widowhood was associated with increased mortality for  
45  
46 both husbands and wives following the death of spouse, with HRs ranging  
47  
48 from 1.06 to 1.26 (all HRs significantly greater than 1 except for widowed  
49  
50 husbands in cohort 1850-1875). The impact of widowhood was  
51  
52  
53  
54

1  
2  
3 disproportionately greater on surviving husbands than on surviving wives in the  
4 pre-1850 and 1876-1900 cohorts, although there was little difference in mortality  
5 between widowed husbands vs. wives in the 1850-1875. There was no clear trend  
6 showing that the hazard ratios changed across cohorts in either surviving  
7 husbands or wives.  
8  
9

10  
11  
12  
13  
14  
15  
16  
17  
18  
19  
20  
21  
22  
23  
24  
25  
26  
27  
28  
29  
30  
31  
32  
33  
34  
35  
36  
37  
38  
39  
40  
41  
42  
43  
44  
45  
46  
47  
48  
49  
50  
51  
52  
53  
54  
55  
56  
57  
58  
59  
60  
Figure 3 shows the hazard ratios along with 95% CIs, and range of p-values for the model in which age at widowhood is accounted for (design model in Table 2b). These results reveal markedly higher bereavement effects in each age at widowhood group compared to the results shown in Figure 2, consistent with the notion that the bereavement effect may be diminished over time and most pronounced in the years proximal to the death of the spouse.<sup>2 5 20 21</sup> In nearly all age at widowhood categories, the bereavement effect is stronger in widowed husbands than in widowed wives.

The number of children surviving when the first spouse died (with two pairwise comparisons 3-6 vs  $\leq 2$ ;  $> 6$  vs  $\leq 2$ ) was included as a time-independent covariate in the models whose results are shown in Figure 3. In general, there was a very weak association between number of surviving children and mortality in husbands and wives. Contrary to our expectations and a prior study,<sup>8</sup> in each case, a higher number of surviving children was not significantly associated with lower mortality in both husbands and wives (See Figure 3). Further, the results in Figure 3 show that the effect of bereavement decreases if the Amish individual remarries.

1  
2  
3  
4  
5  
6  
7  
8  
9  
10  
11  
12  
13  
14  
15  
16  
17  
18  
19  
20  
21  
22  
23  
24  
25  
26  
27  
28  
29  
30  
31  
32  
33  
34  
35  
36  
37  
38  
39  
40  
41  
42  
43  
44  
45  
46  
47  
48  
49  
50  
51  
52  
53  
54  
55  
56  
57  
58  
59  
60

There are two potential sources of bias in analyses involving the number of surviving children covariate. Couples in which one spouse died at age <50 are likely not to have as many children as couples in which both parents survived to at least age 50. To quantify this bias, we repeated the analysis in Figure 3 by excluding all the couples who got widowed before age 50 (data not shown). The results show that there is no significant change in the hazard ratios vs. Figure 3. The maximum change for any of the hazard ratios related to the number of surviving children was 0.03 (data not shown).

On the other end of the age spectrum, there is a potential source of bias as more children may die, the longer the surviving parent lives. Because the number of children was divided into three categories  $\leq 2$ , 3-6, and  $> 6$ , any possible bias could arise when and only when the death of a child shifted the number of surviving children from a higher category to a lower category. Over all couples, the number of widows or widowers whose number of surviving children changed to a lower category from the date of widowhood to the date of death was only 298 (< 3% of all couples).

When the analyses corresponding to Figure 3 were repeated excluding these 298 couples, the hazard ratios were essentially unchanged. The maximum change was 0.04; sometimes the hazard ratio increased slightly and sometime it decreased slightly (data not shown).

Hazard ratios and 95% CIs for the time since bereavement analysis are shown in Figure 4. The significant p-values are indicated in Figure 4. These results were

1  
2  
3  
4  
5  
6  
7  
8  
9  
10  
11  
12  
13  
14  
15  
16  
17  
18  
19  
20  
21  
22  
23  
24  
25  
26  
27  
28  
29  
30  
31  
32  
33  
34  
35  
36  
37  
38  
39  
40  
41  
42  
43  
44  
45  
46  
47  
48  
49  
50  
51  
52  
53  
54  
55  
56  
57  
58  
59  
60

obtained using the CPH model and the design defined in Table 2c. The results show that there is a high risk of mortality for recently widowed husbands and wives. Further, the hazard is higher (not significant) in wives vs. husbands during the first 12 months following bereavement.

The range of p-values provided in Figures 2-4 indicates the significance of each of the hazard ratios. For example, in Figure 4, the p-value = 0.0001 associated with the hazard ratio = 1.39 (males; time since bereavement range < 6 months) strongly indicates that the hazard ratio is significantly > 1. Similarly, the p-value = 0.039 associated with the hazard ratio = 1.15 (males; time since bereavement 37-48 months) weakly indicates the significance of the hazard ratio > 1.

Graphical checks of the overall adequacy of the CPH models were performed.<sup>18 19</sup> Based on the *Cox-Snell residuals* plot, the final model gave a reasonable fit to the data (data not shown). The *deviance residual* plots revealed no obvious outliers in the data (data not shown). Further, the Wald test statistic was used to test the fit of the final model,<sup>18</sup> and according to this test statistic, the final model fits the data reasonably well (Supplementary Tables S1, S2, and S3).

## DISCUSSION

This is the first comprehensive study to evaluate the relationship between



1  
2  
3 bereavement and social support in the Amish population. This study provides  
4 evidence that Amish widows and widowers have increased mortality risk  
5 compared to married cohort members. Although it is difficult to determine  
6 whether this effect is of equivalent magnitude as that observed in studies of other  
7 populations, the most recent studies of the bereavement effect using the CPH  
8 suggest that our findings are generally consistent with data from other  
9 populations.<sup>4</sup>

10  
11  
12  
13  
14  
15  
16  
17  
18  
19  
20 Several previous studies on American, European, and Middle Eastern  
21 populations have found that mortality is magnified in individuals widowed at a  
22 younger age and that widowers have higher mortality risk than widows.<sup>3 5 8 16 20 22</sup>  
23  
24  
25  
26  
27 The LDS study is closest to our study because of the large family sizes and the  
28 population selected as a religious isolate.<sup>8</sup> The effects of bereavement on  
29 mortality with respect to gender and the age at widowhood ranges observed in the  
30 Amish are also largely consistent with those observed in the LDS population,<sup>8</sup> and  
31 other populations such as Finland and Israel (Figure 3).<sup>6 22</sup> As expected, widowers  
32 showed higher hazard ratios than widows except for the 1850-1875 cohort (Figure  
33 2).

34  
35  
36  
37  
38  
39  
40  
41  
42  
43  
44 In the present study, the association between bereavement and mortality is  
45 greater in the first 6 months for both men and women (Figure 4), consistent with  
46 previous findings.<sup>2 3 5 20 21 23</sup> The mortality risks in the first 6 months are lower in  
47 the Amish (Figure 4) compared to some,<sup>2 5 20 21</sup> but not all, studies.<sup>3 23</sup> One  
48  
49  
50  
51  
52  
53  
54  
55  
56  
57  
58  
59  
60  
common pattern observed in this and other studies is that the bereavement effect

1  
2  
3 is higher in the first 6 months and later life.<sup>3 23</sup> We did a regression analysis for  
4 trend in the data of Figure 4 and there is no significant declining trend after the  
5 first 6 months. We speculate that the higher mortality during the first 6 months  
6 might reflect acute effects related to the loss of a spouse, while the higher  
7 mortality in later life might reflect decreased survival from aging-related diseases  
8 that is unmasked in the absence of spousal support.  
9

10  
11 One strength of our study is that we could evaluate the effect of remarriage  
12 because there were substantial numbers of widowed individuals who did and did  
13 not get remarried (Table 1) Shor et al. noted that the difficulty in studying the  
14 effect of remarriage in populations where all individuals are deceased because “In  
15 previous decades, widowed men almost always remarried”.<sup>4</sup> As suggested by  
16 previous studies,<sup>8 9</sup> remarriage after the death of a spouse significantly influences  
17 the bereavement effect because it is associated with increased survival of both  
18 males and females across all cohorts . This association is likely influenced by the  
19 fact that males or females who get remarried are in sufficiently good physical and  
20 mental health to do so. Further, the survival rate is higher for males as compared  
21 to females, possibly reflecting support in Amish society for males getting  
22 remarried.  
23  
24  
25  
26  
27  
28  
29  
30  
31  
32  
33  
34  
35  
36  
37  
38  
39  
40  
41  
42  
43  
44

45  
46 Interestingly, more children at the time of the death of the first spouse was  
47 associated with increased the risk of death, though the hazard ratio for having > 6  
48 surviving children as compared to  $\leq 2$  was not significantly greater than 1.0. This  
49 result does not support the hypothesis that more surviving children confer a  
50  
51  
52  
53  
54

1  
2  
3 survival advantage to parental longevity, as perhaps by providing social support  
4 for their parents. Spouses in the Amish society may also provide unique  
5 emotional, psychological, and social support to each other which cannot be  
6 provided by their surviving children. The lack of protective association was  
7 similarly observed when the number of surviving children was considered as a  
8 linear or as a categorical variable (data not shown). This contrasts with data from  
9 the Utah Population Database, in which increasing numbers of children were  
10 associated with a decreased hazard ratio.<sup>8</sup> We considered the number of surviving  
11 children as a separate term (Table 2a), but did not evaluate the interaction of  
12 number of surviving children with widowhood.  
13  
14  
15  
16  
17  
18  
19  
20  
21  
22  
23  
24  
25

26  
27 The implication of these findings is that differential familial support  
28 following bereavement does not appear to be the key factor affecting mortality  
29 increases in widowed Amish populations. One potential explanation is that  
30 spouses, as “attachment figures,” provide a unique, irreplaceable social support  
31 which must be considered independently from other ancillary support providers,  
32 such as children.<sup>24</sup> Data suggesting that relative mortality risk is also elevated in  
33 divorced and never-married populations may support this hypothesis.<sup>3</sup> In addition,  
34 quality of social support has significantly greater effects on well-being than  
35 quantity of support in elderly populations of both sexes.<sup>25</sup>  
36  
37  
38  
39  
40  
41  
42  
43  
44  
45  
46  
47

48 In adults aged 65 and older, lower reported social support has been associated  
49 with decreased life satisfaction and increased depressive symptoms.<sup>26</sup> Family  
50 members and close friends should be especially vigilant during the sensitive acute  
51  
52  
53  
54

1  
2  
3 period following the loss of a spouse, when relative mortality risk is the highest.  
4

5  
6 There are two limitations of our data. First, the number of surviving children  
7  
8 covariate was simplified because it was treated as a time-independent covariate,  
9  
10 although some children die before their parents, so it could be considered as time-  
11  
12 dependent instead. Second, the causes of death were unavailable. Future research  
13  
14 is needed to study the effect of the loss of a child on the mortality of husbands and  
15  
16 wives by considering the number of surviving children as a time-dependent  
17  
18 covariate. Also, research is needed to determine whether differential measures of  
19  
20 social support may be associated with certain causes of death in widowed  
21  
22 populations. Divorce in the Amish is sufficiently rare that this was not a major  
23  
24 potential source of error.  
25  
26  
27  
28

29  
30 Our study results indicate that remarriage plays an important role in  
31  
32 improving the survival rate of males and females in the Amish population.  
33  
34 Contrary to results from previous studies, an increase in the number of surviving  
35  
36 children was associated with a decreased survival rate of Amish individuals.  
37  
38  
39  
40  
41  
42  
43  
44  
45  
46  
47  
48  
49  
50  
51  
52  
53  
54  
55  
56  
57  
58  
59  
60

1  
2  
3 **Acknowledgments** Thanks to two reviewers for excellent suggestions that led us  
4  
5 to improve the manuscript.  
6  
7

8  
9 **Contributors** BDM conceived the study. AS and SS did the research and data  
10  
11 analysis, with substantial guidance from PFM, BDM, and AAS. AS and SS  
12  
13 wrote the manuscript, with substantial editing by PFM, BDM, and AAS. AAS  
14  
15 managed the project with assistance from BDM. AAS manages the AGDB project  
16  
17 at the National Institutes of Health and KAR managed the AGDB data at  
18  
19 University of Maryland Medical School during the period of this project. ARS  
20  
21 provided resources and advice. All authors proofread and approved the  
22  
23 manuscript.  
24  
25

26  
27 **Funding** This work was supported by research grants R01 HL69313, R01  
28  
29 DK54261, R01 AG1872801, R01 HL088119, R01 AR046838, and U01 HL72515  
30  
31 from the National Institutes of Health. This research was supported in part by the  
32  
33 Intramural Research Program of the National Institutes of Health, NLM and the  
34  
35 Geriatric Research and Education Center, Baltimore Veterans Administration  
36  
37 Medical Center.  
38  
39

40  
41  
42 **Competing interests** None.  
43  
44

45  
46 **Ethics approval** The construction and maintenance of AGDB are covered under  
47  
48 an IRB-approved human subjects protocol at the NIH, Leslie Biesecker, Principal  
49  
50 Investigator.  
51  
52

53  
54 **Provenance and peer review** Not commissioned; externally peer reviewed.  
55  
56

**Data sharing statement** Data from the AGDB are available to investigators (including ARS and various others not participating in this study) who have an IRB-approved protocol to study the Amish or other Anabaptist groups. Investigators can request access to AGDB by writing to AAS and to Dr. Biesecker.

## REFERENCES

1. **Jagger C**, Sutton CJ. Death after marital bereavement—Is the risk increased. *Stat Med*. 1991; **10**:395-404.
2. **Schaefer C**, Quesenberry C, Wi S. Mortality following conjugal bereavement and the effects of a shared environment. *Am J Epidemiol*. 1995; **141**:1142-1152.
3. **Johnson NJ**, Backlund E, Sorlie PD, et al. Marital status and mortality: The national longitudinal mortality study. *Ann Epidemiol*. 2000; **10**:224-238.
4. **Shor E**, Roelfs DJ, Curreli M, et al. Widowhood and mortality: A meta-analysis and meta-regression. *Demography*. 2012; **49**:575-606.
5. **Manor O**, Eisenbach Z. Mortality after spousal loss: Are there socio-demographic differences? *Soc Sci Med*. 2003; **56**:405-413.
6. **Martikainen P**, Valkonen T. Mortality after the death of a spouse: rates and causes of death in a large Finnish cohort. *Am J Public Health*. 1996; **86**:1087-1093.
7. **Espinosa J**, Evans WN. Heightened mortality after the death of a spouse: marriage protection or marriage selection? *J Health Econ*. 2008; **27**:1326-1342.

- 1  
2  
3 8. **Mineau G**, Smith K, Bean L. Historical trends of survival among widows and  
4  
5 widowers. *Soc Sci Med*. 2002; **54**:245-254.  
6  
7
- 8 9. **Helsing KJ**, Szklo M, Comstock GW. Factors associated with mortality after  
9  
10 widowhood. *Am J Public Health*. 1981a; **71**:802-809.  
11  
12
- 13 10. **Stroebe W**, Stroebe MS, Abakoumkin G. Does differential social support cause  
14  
15 sex differences in bereavement outcome? *J Commun Appl Soc Psychol*. 1999;  
16  
17 **9**:1-12.  
18  
19
- 20 11. **Stroebe MS**, Stroebe W, Schut H. Gender differences in adjustment to  
21  
22 bereavement: an empirical and theoretical review. *Rev Gen Psychol*. 2001; **5**:62-  
23  
24 83.  
25  
26
- 27 12. **Hostetler JA**. *Amish society*. 4<sup>th</sup> ed. The Johns Hopkins University Press, MD;  
28  
29 1993.  
30  
31
- 32 13. **Iwasaki M**, Otani T, Sunaga R, et al. Social networks and mortality based on the  
33  
34 Komo-Ise Cohort Study in Japan. *Int J Epidemiol*. 2002; **31**:1208-1218.  
35  
36
- 37 14. **Agarwala R**, Biesecker LG., Hopkins KA, et al. Software for constructing and  
38  
39 verifying pedigrees within large genealogies and an application to the old order  
40  
41 Amish of Lancaster County. *Genome Res*. 1998; **8**:211-221.  
42  
43
- 44 15. **Mitchell BD**, Lee W-J, Tolea M, et al. Living the good life? Mortality and  
45  
46 hospital utilization patterns in the Lancaster County Amish. *PLoS ONE*. 2012;  
47  
48 **7**:e51560.  
49  
50
- 51 16. **Smith KR**, Zick CD. Risk of mortality following widowhood: Age and sex  
52  
53 differences by mode of death. *Soc Biol*. 1996; **43**:59-71.  
54  
55

- 1  
2  
3 17. **R** Development Core Team. *R: A language and environment for statistical*  
4 *computing*. Vienna, Austria: R Foundation for Statistical Computing; 2011.  
5  
6 URL <http://www.R-project.org/>  
7  
8
- 9  
10 18. **Therneau TM**, Grambsch PT. *Modeling Survival Data: Extending the Cox Model*  
11 *Statistics for Biology and Health*. New York, NY: Springer; 2000.  
12  
13
- 14 19. **Tableman M**, Kim JS. *Survival Analysis Using S: Analysis of Time- to-Event Data*.  
15 1<sup>st</sup> ed. New York, NY: Texts in Statistical Science, Chapman and Hall/CRC; 2004.  
16  
17
- 18 20. **Lichtenstein P**, Gatz M, Berg S. A twin study of mortality after spousal bereavement.  
19 *Psychol Med*. 1998; **28**:635-643.  
20  
21
- 22 21. **Mendes De Leon CF**, Kasl SV, Jacobs S. Widowhood and mortality risk in a  
23 community sample of the elderly: A prospective study. *J Clin Epidemiol*. 1993;  
24 **46**:519-527.  
25  
26
- 27 22. **Peritz E**, Bialik O, Groen JJ. Mortality by marital status in the Jewish population  
28 of Israel. *J Chronic Dis*. 1967; **20**:823-828.  
29  
30
- 31 23. **Hart CL**, Hole DJ, Lawlor DA, et al. Effect of conjugal bereavement on mortality  
32 of the bereaved spouse in participants of the Renfrew/Paisley Study. *J Epidemiol*  
33 *Community Health*. 2007; **61**:455-460.  
34  
35
- 36 24. **Diamond LM**. Contributions of psychophysiology to research on adult  
37 attachment: review and recommendations. *Pers Soc Psychol Rev*. 2001; **5**:276-  
38 295.  
39  
40
- 41 25. **Antonucci TC**, Akiyama H. An examination of sex differences in social support  
42 among older men and women. *Sex Roles*. 1987; **17**:737-749.  
43  
44  
45  
46  
47  
48  
49  
50  
51  
52  
53  
54



- 1  
2  
3  
4 26. **Newsom JT**, Schulz R. Social support as a mediator in the relation between  
5  
6 functional status and quality of life in older adults. *Psychol Aging*. 1996; **11**:34-  
7  
8 44.  
9  
10  
11  
12  
13  
14  
15  
16  
17  
18  
19  
20  
21  
22  
23  
24  
25  
26  
27  
28  
29  
30  
31  
32  
33  
34  
35  
36  
37  
38  
39  
40  
41  
42  
43  
44  
45  
46  
47  
48  
49  
50  
51  
52  
53  
54  
55  
56  
57  
58  
59  
60

For peer review only

## FIGURE LEGENDS

Figure 1. A flow diagram that represents all the steps performed for filtering 10,892 couples from total 136,213 couples available in AGDB. In the flow diagram, each couple is counted as excluded only once, even if multiple exclusion criteria apply. “Unknown spouse” refers to entries in the AGDB relationship table in which at least one parent is unknown; almost all of these entries are for adopted children for whom at least one of the biological parents is unknown. Because AGDB is used primarily in genetic studies (unlike this study), the distinction between biological and adoptive relationships is stored. “Birth year too late” means that the birth year of the husband or wife is known and is  $> 1901$ . “Dates not recognized by R” are invalid dates such as the 31st of June, which got into AGDB due to errors in the original sources. “Implausible birth or death dates” refers to a few individuals who are shown as married but have lifespans of less than 10 years likely due to typos in the birth year in the original sources.

Figure 2. Hazard ratios of widowed husbands and wives versus their married counterparts (design provided in Table 2a); \* and \*\* on the top of the blocks represent significance of hazard ratios with  $p\text{-value} < 0.05$  and  $p\text{-value} < 0.001$ , respectively.

Figure 3. Hazard ratios of widowed husbands and wives versus their married counterparts according to age at widowhood (design provided in Table 2b); NSC1: Number of Surviving Children (3-6 vs  $\leq 2$ ); NSC2: Number of Surviving

1  
2  
3 Children (>6 vs ≤ 2); \* and \*\* on the top of the blocks represent significance of  
4 hazard ratios with p-value < 0.05 and p-value < 0.001, respectively.  
5  
6  
7

8 Figure 4. Hazard ratios of widowed husbands and wives versus their married  
9 counterparts according to time since bereavement (months) (design provided in  
10 Table 2c); \* and \*\* on the top of the blocks represent significance of hazard ratios  
11 with p-value < 0.05 and p-value < 0.001, respectively.  
12  
13  
14  
15  
16  
17  
18  
19  
20  
21  
22  
23  
24  
25  
26  
27  
28  
29  
30  
31  
32  
33  
34  
35  
36  
37  
38  
39  
40  
41  
42  
43  
44  
45  
46  
47  
48  
49  
50  
51  
52  
53  
54  
55  
56  
57  
58  
59  
60

## TABLES

Table 1: Characteristics of 10,892 spouse pairs according to birth cohort of husband.

| Cohorts                                         | Pre-1850   | 1850-1875  | 1876-1900  |
|-------------------------------------------------|------------|------------|------------|
| Number of couples                               | 3711       | 3210       | 3971       |
| Number (%) of wives out surviving their husband | 2043(55.0) | 1661(51.7) | 2043(51.4) |
| Number (%) of husbands out surviving their wife | 1668(45.0) | 1549(48.3) | 1928(48.2) |
| Mean husband age at widowhood                   | 63.0       | 59.8       | 62.2       |
| Mean wife age at widowhood                      | 62.0       | 62.8       | 66.9       |
| Mean widowed husband survival in years          | 14.4       | 18.3       | 18.4       |
| Mean widowed wife survival in years             | 15.3       | 16.0       | 16.6       |
| Mean husband age at death                       | 71.1       | 72.0       | 74.6       |
| Mean wife age at death                          | 69.6       | 68.5       | 72.6       |
| Mean age difference husband-wife                | 3.4        | 2.8        | 2.0        |
| Mean number of children                         | 5.4        | 5.3        | 5.3        |
| Number (%) of widowed husbands remarried        | 238(14.2)  | 404(26.0)  | 648(33.6)  |
| Number (%) of widowed wives remarried           | 58(2.8)    | 140(8.4)   | 180(8.8)   |

Table 2a-c. The three tables below illustrate encodings for different CPH designs to test for the bereavement effect, following the general syntax of CPH table designs recommended in (18). See example description in Material and Methods.

Table 2a: Data structure for Cox Proportional Hazard model that does not estimate the effect for different ages, but instead estimates only widowed vs. non-widowed.

| ID | start | stop                 | event | W | R | C |
|----|-------|----------------------|-------|---|---|---|
| 1  | 0     | 47(age at widowhood) | 0     | 0 | 0 | 3 |
| 1  | 47    | 63(age at death)     | 1     | 1 | 1 | 3 |
| 2  | 0     | 60(age at widowhood) | 0     | 0 | 0 | 6 |
| 2  | 60    | 85(age at death)     | 1     | 1 | 0 | 6 |
| 3  | 0     | 59(age at death)     | 1     | 0 | 0 | 4 |

Table 2b: Data structure for Cox Proportional Hazard model that estimates association between widowhood at given ages and mortality.

| ID | start | stop | event | W <sub>&lt;45</sub> | W <sub>45-54</sub> | W <sub>55-64</sub> | W <sub>65-74</sub> | W <sub>75+</sub> | R | C |
|----|-------|------|-------|---------------------|--------------------|--------------------|--------------------|------------------|---|---|
| 1  | 0     | 47   | 0     | 0                   | 0                  | 0                  | 0                  | 0                | 0 | 3 |
| 1  | 47    | 63   | 1     | 0                   | 1                  | 0                  | 0                  | 0                | 1 | 3 |
| 2  | 0     | 60   | 0     | 0                   | 0                  | 0                  | 0                  | 0                | 0 | 6 |
| 2  | 60    | 85   | 1     | 0                   | 0                  | 1                  | 0                  | 0                | 0 | 6 |
| 3  | 0     | 59   | 1     | 0                   | 0                  | 0                  | 0                  | 0                | 0 | 4 |

Table 2c: Data structure for Cox Proportional Hazard model that estimates association between widowhood with respect to time since bereavement and mortality. Start and Stop columns are in years and Time Since Bereavement (TSB) columns are in months.

| ID              | start | stop | event | TSB <sub>0-6</sub> | TSB <sub>7-12</sub> | TSB <sub>13-24</sub> | TSB <sub>25-36</sub> | TSB <sub>37-48</sub> | TSB <sub>49-60</sub> | TSB <sub>&gt;60</sub> |
|-----------------|-------|------|-------|--------------------|---------------------|----------------------|----------------------|----------------------|----------------------|-----------------------|
| ID <sub>1</sub> | 0     | 47   | 0     | 0                  | 0                   | 0                    | 0                    | 0                    | 0                    | 0                     |
| ID <sub>1</sub> | 47    | 47.5 | 0     | 1                  | 0                   | 0                    | 0                    | 0                    | 0                    | 0                     |
| ID <sub>1</sub> | 47.5  | 48   | 0     | 0                  | 1                   | 0                    | 0                    | 0                    | 0                    | 0                     |
| ID <sub>1</sub> | 48    | 49   | 0     | 0                  | 0                   | 1                    | 0                    | 0                    | 0                    | 0                     |
| ID <sub>1</sub> | 49    | 50   | 0     | 0                  | 0                   | 0                    | 1                    | 0                    | 0                    | 0                     |
| ID <sub>1</sub> | 50    | 51   | 0     | 0                  | 0                   | 0                    | 0                    | 1                    | 0                    | 0                     |
| ID <sub>1</sub> | 51    | 52   | 0     | 0                  | 0                   | 0                    | 0                    | 0                    | 1                    | 0                     |

1  
2  
3  
4  
5  
6  
7  
8  
9  
10  
11  
12  
13  
14  
15  
16  
17  
18  
19  
20  
21  
22  
23  
24  
25  
26  
27  
28  
29  
30  
31  
32  
33  
34  
35  
36  
37  
38  
39  
40  
41  
42  
43  
44  
45  
46  
47  
48  
49  
50  
51  
52  
53  
54  
55  
56  
57  
58  
59  
60

|                 |      |      |   |   |   |   |   |   |   |   |
|-----------------|------|------|---|---|---|---|---|---|---|---|
| ID <sub>1</sub> | 52   | 63   | 1 | 0 | 0 | 0 | 0 | 0 | 0 | 1 |
| ID <sub>2</sub> | 0    | 60   | 0 | 0 | 0 | 0 | 0 | 0 | 0 | 0 |
| ID <sub>2</sub> | 60   | 60.5 | 0 | 1 | 0 | 0 | 0 | 0 | 0 | 0 |
| ID <sub>2</sub> | 60.5 | 61   | 0 | 0 | 1 | 0 | 0 | 0 | 0 | 0 |
| ID <sub>2</sub> | 61   | 62   | 0 | 0 | 0 | 1 | 0 | 0 | 0 | 0 |
| ID <sub>2</sub> | 62   | 63   | 0 | 0 | 0 | 0 | 1 | 0 | 0 | 0 |
| ID <sub>2</sub> | 63   | 64   | 0 | 0 | 0 | 0 | 0 | 1 | 0 | 0 |
| ID <sub>2</sub> | 64   | 65   | 0 | 0 | 0 | 0 | 0 | 0 | 1 | 0 |
| ID <sub>2</sub> | 65   | 85   | 1 | 0 | 0 | 0 | 0 | 0 | 0 | 1 |
| ID <sub>3</sub> | 0    | 59   | 1 | 0 | 0 | 0 | 0 | 0 | 0 | 0 |

For peer review only

1  
2  
3  
4  
5  
6  
7  
8  
9  
10  
11  
12  
13  
14  
15  
16  
17  
18  
19  
20  
21  
22  
23  
24  
25  
26  
27  
28  
29  
30  
31  
32  
33  
34  
35  
36  
37  
38  
39  
40  
41  
42  
43  
44  
45  
46  
47  
48  
49  
50  
51  
52  
53  
54  
55  
56  
57  
58  
59  
60

## Analysis of the Bereavement Effect After the Death of a Spouse in the Amish

Ari Seifter<sup>1a</sup>, Sarabdeep Singh<sup>2a</sup>, Patrick F. McArdle<sup>1</sup>, Kathleen A. Ryan<sup>1</sup>, Alan R. Shuldiner<sup>1,3</sup>, Braxton D. Mitchell<sup>1,3</sup>, Alejandro A. Schäffer<sup>2\*</sup>

<sup>1</sup>Department of Medicine and Program for Personalized and Genomic Medicine, University of Maryland School of Medicine, Baltimore, MD

<sup>2</sup>National Center for Biotechnology Information, National Library of Medicine, National Institutes of Health, DHHS, Bethesda, MD

<sup>3</sup> Geriatric Research and Education Clinical Center, Veterans Administration Medical Center, Baltimore, MD

<sup>a</sup> These authors contributed equally and should be considered *aequo loco*.

\*To whom correspondence should be addressed at:

Bldg. 38A, Room 6S608

NCBI/NIH

8600 Rockville Pike

Bethesda, MD 20894

e-mail: schaffer@helix.nih.gov

**Author-suggested Keywords:** bereavement effect, Amish, remarriage, social support, Cox proportional hazards, time-dependent covariate

Word Counts:

Abstract: 248

Introduction through Discussion: 3,757.

**ABSTRACT**

**Objective** This study investigates the association between bereavement and the mortality of a surviving spouse among Amish couples. We hypothesized that the bereavement effect would be relatively small in the Amish due to the unusually cohesive social structure of the Amish that might attenuate the loss of spousal support.

**Design** Population-based cohort study

**Setting** United States of America

**Participants** 10,892 Amish couples born during 1725-1900 located in Pennsylvania, Ohio, and Indiana. All the participants are deceased.

**Outcome measure** The survival time is 'age'; event is 'death'. Hazard ratios of widowed individuals with respect to gender, age at widowhood, remarriage, number of surviving children, and time since bereavement.

**Results** We observed hazard ratios for widowhood ranging from 1.06-1.26 over the study period (nearly all differences significant at  $p < 0.05$ ). Mortality risks tended to be higher in men than in women and in younger compared to older bereaved spouses. There were significantly increased mortality risks in both widows and widowers who did not remarry. We observed a higher number of surviving children to be associated with increased mortality in both males and females. Mortality risk following bereavement was higher in the first 6 months among both men and women.

**Conclusions** We conclude that bereavement effects remain apparent even in this



1  
2  
3  
4  
5  
6  
7  
8  
9 socially cohesive Amish community. Remarriage is associated with a significant  
10 decrease in the mortality risk among Amish individuals. Contrary to results from  
11 previous studies, an increase in the number of surviving children was associated  
12 with decreased survival rate.  
13  
14  
15  
16  
17  
18  
19  
20  
21  
22  
23  
24  
25  
26  
27  
28  
29  
30  
31  
32  
33  
34  
35  
36  
37  
38  
39  
40  
41  
42  
43  
44  
45  
46  
47  
48  
49  
50  
51  
52  
53  
54  
55  
56  
57  
58  
59  
60

## ARTICLE SUMMARY

### Article focus

- The focus of this article is to evaluate the relationship between bereavement and the mortality of a surviving spouse in the Amish population.~~The focus of this article is to evaluate the relationship between bereavement and social support in the Amish population.~~
- We evaluated the association of bereavement and mortality of a surviving spouse with respect to gender, age at widowhood, and time since bereavement while accounting for remarriage, and number of surviving children using Cox proportional hazard models.~~We evaluated the association of surviving spouse gender, age at widowhood, remarriage, number of surviving children, and time since bereavement on the bereavement effect using Cox proportional hazard models.~~

### Key messages

- This study shows that strong social support is not sufficient to decrease the mortality risks among Amish individuals, and therefore the support provided by the spouse is irreplaceable.
- Remarriage significantly decreases the mortality risk for both males and females.

### Strengths and limitations of this study

- Due to the availability of remarriage status of the surviving spouses, we could reproduce and quantify the decreased bereavement effect associated with remarriage.
- Due to the unavailability of data on causes of death, it was not possible to determine the relationship between differential measures of social support and certain causes of death.
- The number of surviving children was simplified to be a time independent covariate although it may change between the death of the first parent and the death of the second parent.

## INTRODUCTION

It has been consistently established that widowed individuals exhibit increased mortality compared to married individuals.<sup>1-4</sup> This excess mortality risk, referred to as the “bereavement effect,” is strongest in the first few years following widowhood, among men who outlive their wives, and among younger widows/widowers.<sup>2-5</sup> Factors proposed to explain this phenomenon include: the acute grief and stress of bereavement; shared environmental risk factors between spouses; marital selection; economic hardship; and loss of social support.<sup>6,7</sup>

These influences are difficult to isolate and independently assess. Several studies have shown that larger social network size and greater level of social support are generally associated with lower rates of mortality and morbidity.<sup>4</sup> In a study based on the Utah Population Database, mortality risk among widowers decreased with membership in the Church of Latter Day Saints (LDS, a.k.a. Mormon Church) and with increasing numbers of children. These factors were interpreted as proxies for social support.<sup>8</sup> Additionally, a study in Washington County, Maryland, indicated that living alone was a risk factor for increased mortality in widowed populations.<sup>9</sup> Loss of social support following the death of a spouse is generally more profound in widowers than in widows, but there is currently no empirical evidence that this difference mediates the higher mortality consistently observed among widowed husbands compared to widowed wives.<sup>10</sup>

11

The Amish maintain a cultural identity distinct from mainstream American

1  
2  
3  
4  
5  
6  
7  
8  
9 culture that is characterized by their traditional dress, a plain lifestyle, and non-  
10 adoption of modern technology (e.g., electricity, cars, telephones), German  
11 dialect, separate school system, and ultra-conservative Anabaptist religious  
12 practices. A central tenet of Amish culture throughout their history in the USA  
13 has been social cohesiveness with emphasis on family and community. Members  
14 of this tight-knit society have extraordinary social support from cradle to grave,  
15 including community-financing of medical costs and support during times of  
16 need. The community financing of medical costs became increasingly formalized  
17 during the 20th century to the point where it is now a formal system of self-  
18 insurance called “Amish Aid”.  
19

20  
21  
22 To gain a different perspective on potential influences of social support on  
23 bereavement, we assessed the bereavement effect in an Amish population, whose  
24 culture is characterized by its core beliefs in community and social cohesion.  
25 Examples of the strong degree of social support within the Amish include  
26 community-managed health insurance and community ties through membership in  
27 the church, and the sharing of ultraconservative cultural beliefs and lifestyles.<sup>12</sup>  
28 We reasoned that the high level of social support in the Amish population might  
29 mitigate the bereavement effect. Previous studies used covariates such as  
30 education (homogeneous in the Amish),<sup>12</sup> health habits, remarriage, church visits,  
31 neighborhood interaction, and household size to study the relationship between  
32 bereavement and social support.<sup>4 8 13</sup>  
33  
34  
35  
36  
37  
38  
39  
40  
41  
42  
43  
44  
45  
46  
47

48 We estimated bereavement effects in widows and widowers separately, and  
49

1  
2  
3  
4  
5  
6  
7  
8  
9 further assessed mortality risks as a function of age at widowhood and time since  
10 bereavement.<sup>2 8</sup> We used Cox proportional hazard (CPH) models to analyze the  
11 association of bereavement and mortality of widowed husbands and wives. We  
12 considered remarriage and number of surviving children as additional potential  
13 modifiers of the bereavement effect.  
14  
15  
16  
17  
18  
19

## 20 MATERIAL AND METHODS

### 21 Data source

22  
23 The Anabaptist Genealogy Database (AGDB) version 5 was used to study the  
24 effect of bereavement on the Amish population.<sup>14 15</sup> The AGDB is a  
25 computerized genealogy database of Amish and some Mennonite populations, last  
26 updated in 2010. This database includes information about the family  
27 relationships and the birth, marriage, and death dates of children of Amish  
28 individuals from North America, mostly located in Pennsylvania, Ohio, and  
29 Indiana. The "individual table" of AGDB contains information about 539,822  
30 individuals. The "relationship table" includes information about 136,213 Amish  
31 couples. An individual who is married multiple times participates in multiple  
32 relationship table entries. There are 1,369 relationship entries among the 136,213  
33 entries concerning children for whom one or both biological parents are unknown  
34 (Figure 1).  
35  
36  
37  
38  
39  
40  
41  
42  
43  
44  
45

46 Amish people rarely give birth out of wedlock, and a vast majority of the  
47 mating samples we used are documented as marriages in the three original sources  
48  
49  
50

1  
2  
3  
4  
5  
6  
7  
8  
9 from which AGDB is derived. However, there is less availability of marriage  
10 dates than birth dates; we did not wish to exclude couples with missing marriage  
11 dates. For this study, we included couples in which both spouses met four  
12 conditions: (1) they were born prior to January 1, 1901; (2) their birth and death  
13 dates were recorded; (3) they were in their first marriage; and (4) they did not die  
14 on the same day. Constraint (4) excludes couples who may have died from a  
15 shared disaster (e.g., accident). A total of 10,892 couples met the inclusion  
16 criteria. The oldest person included was born on February 14, 1725, and the  
17 youngest on December 30, 1900. See Figure 1 for how the exclusion criteria were  
18 applied.  
19

20  
21  
22 Our data set included 10,892 couples with information on their date of birth,  
23 date of death, number of surviving children, family IDs, and remarriage status  
24 after widowhood. For some analyses, these couples were first partitioned into  
25 three cohorts based on the husband's birth year (prior to 1850 and 1850-1875) and  
26 based on both husband's and wife's birth year (1876-1900) and sex. For the time  
27 since bereavement analyses, we did not partition into cohorts because the number  
28 of widow(er)s who died within 6 months after being bereaved is small (N=291).  
29 Characteristics of these couples are shown in Table 1.  
30  
31

### 32 **Statistical analyses**

33  
34 Similar to several past analyses,<sup>2 8 13 16</sup> we used the Cox Proportional  
35 Hazards (CPH) model where the response variable or survival time is 'age at  
36 death' and the event is 'death'. The model is used to study the association of  
37  
38  
39  
40  
41  
42

1  
2  
3  
4  
5  
6  
7  
8  
9 widowhood and mortality rates in the surviving spouse, while adjusting for  
10 covariates such as education, health habits, age in years, number of children,  
11 and remarriage. In some of our analyses, we adjusted for remarriage and  
12 number of children as covariates; we did not adjust for education or health  
13 habits. Husbands and wives were always analyzed separately.  
14  
15  
16  
17

18 The main covariate, widowhood, was monitored as a time-dependent  
19 covariate, by assigning a value of 1 for each time period the individual was  
20 widowed and 0 otherwise. The remarriage covariate was also a time-dependent  
21 covariate, by assigning a value 1 for the widowed period if the individual  
22 remarried and 0 otherwise. The number of surviving children was a time-  
23 independent covariate and counted at the beginning of widowhood period of the  
24 surviving spouse. The covariate was divided into three categories, as follows:  
25 0=number of surviving children is  $\leq 2$ , 1=number of surviving children is between  
26 3 and 6, and 2=number of surviving children is  $>6$ . The categories  $\leq 2$  children, 3-  
27 6 children, and  $> 6$  children are separate. These boundaries were chosen to ensure  
28 categories that were roughly balanced in size. To evaluate any possible bias by  
29 counting the number of surviving children at the death of the first spouse, we also  
30 estimated how many couples changed categories between the death of the first  
31 spouse and the death of second spouse due to death of one or more children  
32 during the widowhood period.  
33  
34  
35  
36  
37  
38  
39  
40  
41  
42  
43  
44  
45

46 Survival analyses were performed using the R programming environment.<sup>17</sup>  
47  
48 All estimates and confidence intervals were obtained using the `coxph` function  
49  
50



1  
2  
3  
4  
5  
6  
7  
8  
9 available in the `survival` package.

### 10 11 **Representation of survival data for CPH analysis**

12 We show below examples of how we represented the survival data for CPH  
13 analysis using a time modeling approach. To represent the survival data columns, the  
14 standard approach is to convert the couple's demographic information, date of  
15 death, date of birth, remarriage and number of surviving children into columns  
16 representing **start** time, **stop** time, **event** status, and all of the included covariates  
17 (widowhood, remarriage, and number of surviving children).<sup>18 19</sup> Here (**start**,  
18 **stop**) is an interval of risk, open on the left and closed on the right; the **event**  
19 column is set to 1 if the subject had an event (death) at time **stop** and is 0  
20 otherwise. To illustrate the subtleties, we consider a hypothetical example of  
21 three wives (ID<sub>1</sub>, ID<sub>2</sub> and ID<sub>3</sub>) from the cohort 1850-1875.  
22  
23  
24  
25  
26  
27  
28  
29  
30  
31

32  
33 • *ID*<sub>1</sub>: born on 01/01/1860; widowed on 01/01/1907 at age 47; got remarried;  
34 number of surviving children = 3 and eventually died on 01/01/1923 at age 63.  
35  
36  
37

38  
39 • *ID*<sub>2</sub>: born on 09/01/1870; widowed on 09/01/1930 at age 60; never got  
40 remarried; number of surviving children = 6 and died on 09/01/1955 at age 85.  
41  
42  
43

44  
45 • *ID*<sub>3</sub>: born on 03/01/1871; never widowed and never remarried; number of  
46 surviving children = 4 and died on 04/01/1930 at age 59.  
47  
48  
49

1  
2  
3  
4  
5  
6  
7  
8  
9 The data used for the CPH considering widowhood as a single time-  
10 dependent covariate is presented in Table 2a. The following model was used to  
11 estimate the association between widowhood and mortality.  
12

$$13 \quad h(t) = h_0(t) \exp[\beta W]$$

14  
15  
16 This model can be run with additional covariates and results that adjust for the  
17 ability to remarry and the number of surviving children are presented.  
18  
19

### 20 **Timing of widowhood**

21  
22 The above model considers widowhood as a single time-dependent  
23 covariate, evaluating the association between mortality and being  
24 widowed. One can further ask if that association varies over the life  
25 course by considering the impact of age at widowhood on mortality.  
26  
27 We addressed this issue following the approach of Mineau et al. by  
28 adding terms for age at widowhood into the model as covariates (<45,  
29 45-54, 55-64, 65-74 and >75) to allow the hazard ratio (HR) to vary according to  
30 age at widowhood (see Table 2b).<sup>8</sup> These terms were included in the model  
31 as time-dependent dummy variables, created to represent the  
32 widowhood experience of each individual across the 5 age windows  
33 spanning the individual's age:  $W_{<45}$ ,  $W_{45-54}$ ,  $W_{55-64}$ ,  $W_{65-74}$ , and  $W_{75+}$ .  
34  
35 Further, we also addressed the impact of remarriage and number of  
36 surviving children on the mortality of Amish individuals.  
37  
38

39  
40 The following model can be used to estimate the association  
41 between each of the five dummy variables and mortality:  
42  
43  
44  
45  
46  
47  
48  
49

$$h(t) = h_0(t) \exp[\sum \beta_j W_j + \beta_6 R + \beta_7 C] \text{ with } j = 1, \dots, 5$$

where  $W_1, \dots, W_5$  dummy variables are associated with  $W_{<45}$ ,  $W_{45-54}$ ,  $W_{55-64}$ ,  $W_{65-74}$ ,  $W_{75+}$  columns provided in the Table 2b.

### Time since bereavement

Next, we evaluated the association between mortality and time since bereavement or widowhood. We followed the approach of Schaefer et al. by considering the following time since bereavement ranges: 0-6 months, 7-12 months, 13-24 months, 25-36 months, 37-48 months, 49-60 months and > 60 months.<sup>2</sup> This approach allowed us to estimate HR according to time since bereavement (see Table 2c). The columns TSB<sub>0-6</sub>, TSB<sub>7-12</sub>, ... in Table 2c are time dependent covariates that change with the survival time associated with widowed husbands and wives. We did not account for remarriage in this analysis because of missing remarriage dates.

The following model was used to study the association between mortality and time since bereavement:

$$h(t) = h_0(t) \exp[\sum \beta_j W_j] \text{ with } j = 1, \dots, 7$$

where  $W_1, \dots, W_7$  dummy variables are associated with the TSB<sub>0-6</sub>, TSB<sub>7-12</sub>, TSB<sub>13-24</sub>, TSB<sub>25-36</sub>, TSB<sub>37-48</sub>, TSB<sub>49-60</sub> and TSB<sub>>60</sub> columns provided in the Table 2c.

## RESULTS

1  
2  
3  
4  
5  
6  
7  
8  
9 We initially partitioned the 10,892 couples from AGDB into three cohorts ranging  
10 in size from 3,210 (husband birth year 1850-1875) to 3,971 (husband birth year  
11 1876-1900). Wives were more likely to die after their husbands in all three  
12 cohorts while husbands had a higher mean age at death than their wives. The  
13 average age differences between the husbands and wives for all cohorts are shown  
14 in Table 1. The number of remarried wives was far smaller than the number of  
15 remarried husbands (n = 1,290 widowed husbands vs 378 widowed wives). The  
16 number and proportion of remarried husbands and wives were increased in the  
17 more contemporary cohorts (see Table 1). In contrast to other populations from  
18 the 19th and early 20th centuries,<sup>4</sup> the majority of widowed husbands did not  
19 remarry, making it interesting to study the effect of remarriage in the Amish  
20 population.  
21  
22  
23  
24  
25  
26  
27  
28  
29  
30

### 31 **Hazard Ratios**

32  
33 The overall hazard ratios (HR), and their 95% confidence intervals (CIs),  
34 associated with widowhood are displayed in Figure 2 according to birth cohort.  
35  
36 The significance of these hazard ratios are indicated with the help of p-values  
37 (\*:p-value<0.05 and \*\*:p-value<0.001) on the top of each block in Figure 2.  
38  
39 These hazard ratios were estimated using the CPH model and design provided in  
40 Table 2a. As expected, widowhood was associated with increased mortality for  
41 both husbands and wives following the death of spouse, with HRs ranging  
42 from 1.06 to 1.26 (all HRs significantly greater than 1 except for widowed  
43 husbands in cohort 1850-1875). The impact of widowhood was  
44  
45  
46  
47  
48  
49  
50

1  
2  
3  
4  
5  
6  
7  
8  
9 disproportionately greater on surviving husbands than on surviving wives in the  
10 pre-1850 and 1876-1900 cohorts, although there was little difference in mortality  
11 between widowed husbands vs. wives in the 1850-1875. There was no clear trend  
12 showing that the hazard ratios changed across cohorts in either surviving  
13 husbands or wives.  
14  
15  
16  
17

18 Figure 3 shows the hazard ratios along with 95% CIs, and range of p-values  
19 for the model in which age at widowhood is accounted for (design model in Table  
20 2b). These results reveal markedly higher bereavement effects in each age at  
21 widowhood group compared to the results shown in Figure 2, consistent with the  
22 notion that the bereavement effect may be diminished over time and most  
23 pronounced in the years proximal to the death of the spouse.<sup>2 5 20 21</sup> In nearly all  
24 age at widowhood categories, the bereavement effect is stronger in widowed  
25 husbands than in widowed wives.  
26  
27  
28  
29  
30  
31  
32

33 The number of children surviving when the first spouse died (with two  
34 pairwise comparisons 3-6 vs  $\leq 2$ ;  $> 6$  vs  $\leq 2$ ) was included as a time-independent  
35 covariate in the models whose results are shown in Figure 3. In general, there  
36 was a very weak association between number of surviving children and mortality  
37 in husbands and wives. Contrary to our expectations and a prior study,<sup>8</sup> in each  
38 case, a higher number of surviving children was not significantly associated with  
39 lower mortality in both husbands and wives (See Figure 3). Further, the results in  
40 Figure 3 show that the effect of bereavement decreases if the Amish individual  
41 remarries.  
42  
43  
44  
45  
46  
47  
48  
49

1  
2  
3  
4  
5  
6  
7  
8  
9 There are two potential sources of bias in analyses involving the number of  
10 surviving children covariate. Couples in which one spouse died at age <50 are  
11 likely not to have as many children as couples in which both parents survived to  
12 at least age 50. To quantify this bias, we repeated the analysis in Figure 3 by  
13 excluding all the couples who got widowed before age 50 (data not shown). The  
14 results show that there is no significant change in the hazard ratios vs. Figure 3.  
15 The maximum change for any of the hazard ratios related to the number of  
16 surviving children was 0.03 (data not shown).  
17  
18  
19  
20  
21  
22  
23

24 On the other end of the age spectrum, there is a potential source of bias as  
25 more children may die, the longer the surviving parent lives. Because the number  
26 of children was divided into three categories  $\leq 2$ , 3-6, and  $> 6$ , any possible bias  
27 could arise when and only when the death of a child shifted the number of  
28 surviving children from a higher category to a lower category. Over all couples,  
29 the number of widows or widowers whose number of surviving children changed  
30 to a lower category from the date of widowhood to the date of death was only 298  
31 (< 3% of all couples).  
32  
33  
34  
35  
36  
37  
38

39 When the analyses corresponding to Figure 3 were repeated excluding these  
40 298 couples, the hazard ratios were essentially unchanged. The maximum change  
41 was 0.04; sometimes the hazard ratio increased slightly and sometime it decreased  
42 slightly (data not shown).  
43  
44  
45

46 Hazard ratios and 95% CIs for the time since bereavement analysis are shown  
47 in Figure 4. The significant p-values are indicated in Figure 4. These results were  
48  
49

1  
2  
3  
4  
5  
6  
7  
8  
9  
10  
11  
12  
13  
14  
15  
16  
17  
18  
19  
20  
21  
22  
23  
24  
25  
26  
27  
28  
29  
30  
31  
32  
33  
34  
35  
36  
37  
38  
39  
40  
41  
42  
43  
44  
45  
46  
47  
48  
49  
50  
51  
52  
53  
54  
55  
56  
57  
58  
59  
60

obtained using the CPH model and the design defined in Table 2c. The results show that there is a high risk of mortality for recently widowed husbands and wives. Further, the hazard is higher (not significant) in wives vs. husbands during the first 12 months following bereavement. Hazard ratios and 95% CIs for the time since bereavement analysis are shown in Figure 4. The significant p values are indicated in Figure 4. These results were obtained using the CPH model and the design defined in Table 2c. The results show that there is an increase in risk of mortality for recently widowed husbands and wives, and the hazard decreases with time since bereavement but remains significantly greater than 1. Further, the hazard is higher (not significant) in wives vs. husbands during the first 12 months following bereavement.

The range of p-values provided in Figures 2-4 indicates the significance of each of the hazard ratios. For example, in Figure 4, the p-value = 0.0001 associated with the hazard ratio = 1.39 (males; time since bereavement range < 6 months) strongly indicates that the hazard ratio is significantly > 1. Similarly, the p-value = 0.039 associated with the hazard ratio = 1.15 (males; time since bereavement 37-48 months) weakly indicates the significance of the hazard ratio > 1.

Graphical checks of the overall adequacy of the CPH models were performed.<sup>18 19</sup> Based on the *Cox-Snell residuals* plot, the final model gave a reasonable fit to the data (data not shown). The *deviance residual* plots revealed no obvious outliers in the data (data not shown). Further, the Wald test

1  
2  
3  
4  
5  
6  
7  
8  
9 statistic was used to test the fit of the final model,<sup>18</sup> and according to this test  
10 statistic, the final model fits the data reasonably well (Supplementary Tables S1,  
11 S2, and S3).  
12  
13

## 14 15 16 **DISCUSSION** 17

18  
19  
20 This is the first comprehensive study to evaluate the relationship between  
21 bereavement and social support in the Amish population. This study provides  
22 evidence that Amish widows and widowers have increased mortality risk  
23 compared to married cohort members. Although it is difficult to determine  
24 whether this effect is of equivalent magnitude as that observed in studies of other  
25 populations, the most recent studies of the bereavement effect using the CPH  
26 suggest that our findings are generally consistent with data from other  
27 populations.<sup>4</sup>  
28  
29

30  
31 Several previous studies on American, European, and Middle Eastern  
32 populations have found that mortality is magnified in individuals widowed at a  
33 younger age and that widowers have higher mortality risk than widows.<sup>3 5 8 16 20 22</sup>  
34  
35 The LDS study is closest to our study because of the large family sizes and the  
36 population selected as a religious isolate.<sup>8</sup> The effects of bereavement on  
37 mortality with respect to gender and the age at widowhood ranges observed in the  
38 Amish are also largely consistent with those observed in the LDS population,<sup>8</sup> and  
39 other populations such as Finland and Israel (Figure 3).<sup>6 22</sup> As expected, widowers  
40  
41  
42  
43  
44  
45  
46  
47  
48  
49  
50



showed higher hazard ratios than widows except for the 1850-1875 cohort (Figure 2).

~~In the present study, the association between bereavement and mortality is greater in the first 6 months for both men and women (Figure 4), consistent with previous findings.<sup>2,3,5,20,21,23</sup> The mortality risks in the first 6 months are lower in the Amish (Figure 4) compared to some studies,<sup>2,5,20,21</sup> but not all studies.<sup>3,23</sup> One common pattern observed in this and other studies is that the initially high bereavement effect first decreases but then increases with time since bereavement.<sup>3-23</sup> We speculate that the increased mortality during the first 6 months might reflect acute effects related to the loss of a spouse, while the gradual increases in mortality emerging in later life might reflect decreased survival from aging-related diseases that is unmasked in the absence of spousal support.~~ In the present study, the association between bereavement and mortality is greater in the first 6 months for both men and women (Figure 4), consistent with previous findings.<sup>2,3,5,20,21,23</sup> The mortality risks in the first 6 months are lower in the Amish (Figure 4) compared to some<sup>2,5,20,21</sup> but not all, studies.<sup>3,23</sup> One common pattern observed in this and other studies is that the bereavement effect is higher in the first 6 months and later life.<sup>3,23</sup> We did a regression analysis for trend in the data of Figure 4 and there is no significant declining trend after the first 6 months. We speculate that the higher mortality during the first 6 months might reflect acute effects related to the loss of a spouse, while the higher mortality in later life might reflect decreased survival from aging-related diseases

Formatted: Superscript

Formatted: Superscript

Formatted: Superscript

Formatted: Superscript

1  
2  
3  
4  
5  
6  
7  
8  
9 that is unmasked in the absence of spousal support.

10  
11 One strength of our study is that we could evaluate the effect of remarriage  
12 because there were substantial numbers of widowed individuals who did and did  
13 not get remarried (Table 1) Shor et al. noted that the difficulty in studying the  
14 effect of remarriage in populations where all individuals are deceased because “In  
15 previous decades, widowed men almost always remarried”.<sup>4</sup> As suggested by  
16 previous studies,<sup>8,9</sup> remarriage after the death of a spouse significantly influences  
17 the bereavement effect because it is associated with increased survival of both  
18 males and females across all cohorts. This association is likely influenced by the  
19 fact that males or females who get remarried are in sufficiently good physical and  
20 mental health to do so. Further, the survival rate is higher for males as compared  
21 to females, possibly reflecting support in Amish society for males getting  
22 remarried.  
23  
24  
25  
26  
27  
28  
29  
30  
31  
32

33 Interestingly, more children at the time of the death of the first spouse was  
34 associated with increased the risk of death, though the hazard ratio for having > 6  
35 surviving children as compared to ≤ 2 was not significantly greater than 1.0. This  
36 result does not support the hypothesis that more surviving children confer a  
37 survival advantage to parental longevity, as perhaps by providing social support  
38 for their parents. Spouses in the Amish society may also provide unique  
39 emotional, psychological, and social support to each other which cannot be  
40 provided by their surviving children. The lack of protective association was  
41 similarly observed when the number of surviving children was considered as a  
42  
43  
44  
45  
46  
47  
48  
49  
50

1  
2  
3  
4  
5  
6  
7  
8  
9 linear or as a categorical variable (data not shown). This contrasts with data from  
10 the Utah Population Database, in which increasing numbers of children were  
11 associated with a decreased hazard ratio.<sup>8</sup> We considered the number of surviving  
12 children as a separate term (Table 2a), but did not evaluate the interaction of  
13 number of surviving children with widowhood. Interestingly, increasing numbers  
14 of surviving children at the time of widowhood did not confer a survival  
15 advantage for Amish individuals. This result was counter to our hypothesis that  
16 children can help provide social support for their parents. The hazard ratio was  
17 greater than 1.0 (but not significant) for all Amish individuals with number of  
18 surviving children > 6 as compared to ≤ 2. Spouses in the Amish society may also  
19 provide unique emotional, psychological, and social support to each other which  
20 cannot be provided by their surviving children. The lack of protective association  
21 was similarly observed when the number of surviving children was considered as  
22 a linear or as a categorical variable (data not shown). This contrasts with data  
23 from the Utah Population Database, in which increasing numbers of children were  
24 associated with a decreased hazard ratio.<sup>8</sup>

Formatted: Superscript

25  
26  
27  
28  
29  
30  
31  
32  
33  
34  
35  
36  
37  
38  
39 The implication of these findings is that differential familial support  
40 following bereavement does not appear to be the key factor affecting mortality  
41 increases in widowed Amish populations. One potential explanation is that  
42 spouses, as “attachment figures,” provide a unique, irreplaceable social support  
43 which must be considered independently from other ancillary support providers,  
44 such as children.<sup>24</sup> Data suggesting that relative mortality risk is also elevated in

1  
2  
3  
4  
5  
6  
7  
8  
9 divorced and never-married populations may support this hypothesis.<sup>3</sup> In addition,  
10 quality of social support has significantly greater effects on well-being than  
11 quantity of support in elderly populations of both sexes.<sup>25</sup>  
12

13  
14 In adults aged 65 and older, lower reported social support has been associated  
15 with decreased life satisfaction and increased depressive symptoms.<sup>26</sup> Family  
16 members and close friends should be especially vigilant during the sensitive acute  
17 period following the loss of a spouse, when relative mortality risk is the highest.  
18  
19

20  
21 There are two limitations of our data. First, the number of surviving children  
22 covariate was simplified because it was treated as a time-independent covariate,  
23 although some children die before their parents, so it could be considered as time-  
24 dependent instead. Second, the causes of death were unavailable. Future research  
25 is needed to study the effect of the loss of a child on the mortality of husbands and  
26 wives by considering the number of surviving children as a time-dependent  
27 covariate. Also, research is needed to determine whether differential measures of  
28 social support may be associated with certain causes of death in widowed  
29 populations. Divorce in the Amish is sufficiently rare that this was not a major  
30 potential source of error.  
31  
32

33  
34 Our study results indicate that remarriage plays an important role in  
35 improving the survival rate of males and females in the Amish population.  
36 Contrary to results from previous studies, an increase in the number of surviving  
37 children was associated with a decreased survival rate of Amish individuals.  
38  
39

40  
41 **Acknowledgments** Thanks to two reviewers for excellent suggestions that led us  
42  
43  
44  
45  
46  
47

1  
2  
3  
4  
5  
6  
7  
8  
9 to improve the manuscript.

10  
11 **Contributors** BDM conceived the study. AS and SS did the research and data  
12 analysis, with substantial guidance from PFM, BDM, and AAS. AS and SS  
13 wrote the manuscript, with substantial editing by PFM, BDM, and AAS. AAS  
14 managed the project with assistance from BDM. AAS manages the AGDB project  
15 at the National Institutes of Health and KAR managed the AGDB data at  
16 University of Maryland Medical School during the period of this project. ARS  
17 provided resources and advice. All authors proofread and approved the  
18 manuscript.  
19

20  
21 **Funding** This work was supported by research grants R01 HL69313, R01  
22 DK54261, R01 AG1872801, R01 HL088119, R01 AR046838, and U01 HL72515  
23 from the National Institutes of Health. This research was supported in part by the  
24 Intramural Research Program of the National Institutes of Health, NLM and the  
25 Geriatric Research and Education Center, Baltimore Veterans Administration  
26 Medical Center.  
27

28  
29 **Competing interests** None.  
30

31  
32 **Ethics approval** The construction and maintenance of AGDB are covered under  
33 an IRB-approved human subjects protocol at the NIH, Leslie Biesecker, Principal  
34 Investigator.  
35

36  
37 **Provenance and peer review** Not commissioned; externally peer reviewed.  
38  
39  
40  
41  
42  
43  
44  
45  
46  
47  
48  
49

1  
2  
3  
4  
5  
6  
7  
8  
9 **Data sharing statement** Data from the AGDB are available to investigators  
10 (including ARS and various others not participating in this study) who have an  
11 IRB-approved protocol to study the Amish or other Anabaptist groups.  
12 Investigators can request access to AGDB by writing to AAS and to Dr.  
13 Biesecker.  
14  
15  
16  
17

#### 18 REFERENCES

- 19 1. **Jagger C**, Sutton CJ. Death after marital bereavement—Is the risk increased. *Stat*  
20 *Med.* 1991; **10**:395-404.
- 21 2. **Schaefer C**, Quesenberry C, Wi S. Mortality following conjugal bereavement and  
22 the effects of a shared environment. *Am J Epidemiol.* 1995; **141**:1142-1152.
- 23 3. **Johnson NJ**, Backlund E, Sorlie PD, et al. Marital status and mortality: The  
24 national longitudinal mortality study. *Ann Epidemiol.* 2000; **10**:224-238.
- 25 4. **Shor E**, Roelfs DJ, Curreli M, et al. Widowhood and mortality: A meta-analysis  
26 and meta-regression. *Demography.* 2012; **49**:575-606.
- 27 5. **Manor O**, Eisenbach Z. Mortality after spousal loss: Are there socio-  
28 demographic differences? *Soc Sci Med.* 2003; **56**:405-413.
- 29 6. **Martikainen P**, Valkonen T. Mortality after the death of a spouse: rates and  
30 causes of death in a large Finnish cohort. *Am J Public Health.* 1996; **86**:1087-  
31 1093.
- 32 7. **Espinosa J**, Evans WN. Heightened mortality after the death of a spouse:  
33 marriage protection or marriage selection? *J Health Econ.* 2008; **27**:1326-1342.
- 34 8. **Mineau G**, Smith K, Bean L. Historical trends of survival among widows and  
35  
36  
37  
38  
39  
40  
41  
42  
43  
44  
45  
46  
47  
48  
49  
50  
51

- widowers. *Soc Sci Med*. 2002; **54**:245-254.
9. **Helsing KJ**, Szklo M, Comstock GW. Factors associated with mortality after widowhood. *Am J Public Health*. 1981a; **71**:802-809.
10. **Stroebe W**, Stroebe MS, Abakoumkin G. Does differential social support cause sex differences in bereavement outcome? *J Commun Appl Soc Psychol*. 1999; **9**:1-12.
11. **Stroebe MS**, Stroebe W, Schut H. Gender differences in adjustment to bereavement: an empirical and theoretical review. *Rev Gen Psychol*. 2001; **5**:62-83.
12. **Hostetler JA**. *Amish society*. 4<sup>th</sup> ed. The Johns Hopkins University Press, MD; 1993.
13. **Iwasaki M**, Otani T, Sunaga R, et al. Social networks and mortality based on the Komo-Ise Cohort Study in Japan. *Int J Epidemiol*. 2002; **31**:1208-1218.
14. **Agarwala R**, Biesecker LG., Hopkins KA, et al. Software for constructing and verifying pedigrees within large genealogies and an application to the old order Amish of Lancaster County. *Genome Res*. 1998; **8**:211-221.
15. **Mitchell BD**, Lee W-J, Tolea M, et al. Living the good life? Mortality and hospital utilization patterns in the Lancaster County Amish. *PLoS ONE*. 2012; **7**:e51560.
16. **Smith KR**, Zick CD. Risk of mortality following widowhood: Age and sex differences by mode of death. *Soc Biol*. 1996; **43**:59-71.
17. **R Development Core Team**. R: *A language and environment for statistical*

- 1  
2  
3  
4  
5  
6  
7  
8  
9 *computing*. Vienna, Austria: R Foundation for Statistical Computing; 2011.  
10  
11 URL <http://www.R-project.org/>  
12  
13 18. **Therneau TM**, Grambsch PT. *Modeling Survival Data: Extending the Cox Model*  
14 *Statistics for Biology and Health*. New York, NY: Springer; 2000.  
15  
16 19. **Tableman M**, Kim JS. *Survival Analysis Using S: Analysis of Time- to-Event Data*.  
17  
18 1<sup>st</sup> ed. New York, NY: Texts in Statistical Science, Chapman and Hall/CRC; 2004.  
19  
20 20. **Lichtenstein P**, Gatz M, Berg S. A twin study of mortality after spousal bereavement.  
21  
22 *Psychol Med*. 1998; **28**:635-643.  
23  
24 21. **Mendes De Leon CF**, Kasl SV, Jacobs S. Widowhood and mortality risk in a  
25  
26 community sample of the elderly: A prospective study. *J Clin Epidemiol*. 1993;  
27  
28 **46**:519-527.  
29  
30 22. **Peritz E**, Bialik O, Groen JJ. Mortality by marital status in the Jewish population  
31  
32 of Israel. *J Chronic Dis*. 1967; **20**:823-828.  
33  
34 23. **Hart CL**, Hole DJ, Lawlor DA, et al. Effect of conjugal bereavement on mortality  
35  
36 of the bereaved spouse in participants of the Renfrew/Paisley Study. *J Epidemiol*  
37  
38 *Community Health*. 2007; **61**:455-460.  
39  
40 24. **Diamond LM**. Contributions of psychophysiology to research on adult  
41  
42 attachment: review and recommendations. *Pers Soc Psychol Rev*. 2001; **5**:276-  
43  
44 295.  
45  
46 25. **Antonucci TC**, Akiyama H. An examination of sex differences in social support  
47  
48 among older men and women. *Sex Roles*. 1987; **17**:737-749.  
49  
50  
51  
52  
53  
54  
55  
56  
57  
58  
59  
60



- 1  
2  
3  
4  
5  
6  
7  
8  
9 26. **Newsom JT**, Schulz R. Social support as a mediator in the relation between  
10 functional status and quality of life in older adults. *Psychol Aging*. 1996; **11**:34-  
11 44.  
12  
13  
14  
15  
16  
17  
18  
19  
20  
21  
22  
23  
24  
25  
26  
27  
28  
29  
30  
31  
32  
33  
34  
35  
36  
37  
38  
39  
40  
41  
42  
43  
44  
45  
46  
47  
48  
49  
50  
51  
52  
53  
54  
55  
56  
57  
58  
59  
60

## FIGURE LEGENDS

Figure 1. A flow diagram that represents all the steps performed for filtering 10,892 couples from total 136,213 couples available in AGDB. In the flow diagram, each couple is counted as excluded only once, even if multiple exclusion criteria apply. “Unknown spouse” refers to entries in the AGDB relationship table in which at least one parent is unknown; almost all of these entries are for adopted children for whom at least one of the biological parents is unknown. Because AGDB is used primarily in genetic studies (unlike this study), the distinction between biological and adoptive relationships is stored. “Birth year too late” means that the birth year of the husband or wife is known and is  $> 1901$ . “Dates not recognized by R” are invalid dates such as the 31st of June, which got into AGDB due to errors in the original sources. “Implausible birth or death dates” refers to a few individuals who are shown as married but have lifespans of less than 10 years likely due to typos in the birth year in the original sources.

Figure 2. Hazard ratios of widowed husbands and wives versus their married counterparts (design provided in Table 2a); \* and \*\* on the top of the blocks represent significance of hazard ratios with  $p\text{-value} < 0.05$  and  $p\text{-value} < 0.001$ , respectively.

Figure 3. Hazard ratios of widowed husbands and wives versus their married counterparts according to age at widowhood (design provided in Table 2b); NSC1: Number of Surviving Children (3-6 vs  $\leq 2$ ); NSC2: Number of Surviving

1  
2  
3  
4  
5  
6  
7  
8  
9 Children (>6 vs ≤ 2); \* and \*\* on the top of the blocks represent significance of  
10 hazard ratios with p-value < 0.05 and p-value < 0.001, respectively.

11  
12 Figure 4. Hazard ratios of widowed husbands and wives versus their married  
13 counterparts according to time since bereavement (months) (design provided in  
14 Table 2c); \* and \*\* on the top of the blocks represent significance of hazard ratios  
15 with p-value < 0.05 and p-value < 0.001, respectively.  
16  
17  
18  
19  
20  
21  
22  
23  
24  
25  
26  
27  
28  
29  
30  
31  
32  
33  
34  
35  
36  
37  
38  
39  
40  
41  
42  
43  
44  
45  
46  
47  
48  
49  
50  
51  
52  
53  
54  
55  
56  
57  
58  
59  
60

## TABLES

Table 1: Characteristics of 10,892 spouse pairs according to birth cohort of husband.

| Cohorts                                         | Pre-1850   | 1850-1875  | 1876-1900  |
|-------------------------------------------------|------------|------------|------------|
| Number of couples                               | 3711       | 3210       | 3971       |
| Number (%) of wives out surviving their husband | 2043(55.0) | 1661(51.7) | 2043(51.4) |
| Number (%) of husbands out surviving their wife | 1668(45.0) | 1549(48.3) | 1928(48.2) |
| Mean husband age at widowhood                   | 63.0       | 59.8       | 62.2       |
| Mean wife age at widowhood                      | 62.0       | 62.8       | 66.9       |
| Mean widowed husband survival in years          | 14.4       | 18.3       | 18.4       |
| Mean widowed wife survival in years             | 15.3       | 16.0       | 16.6       |
| Mean husband age at death                       | 71.1       | 72.0       | 74.6       |
| Mean wife age at death                          | 69.6       | 68.5       | 72.6       |
| Mean age difference husband-wife                | 3.4        | 2.8        | 2.0        |
| Mean number of children                         | 5.4        | 5.3        | 5.3        |
| Number (%) of widowed husbands remarried        | 238(14.2)  | 404(26.0)  | 648(33.6)  |
| Number (%) of widowed wives remarried           | 58(2.8)    | 140(8.4)   | 180(8.8)   |

Table 2a-c. The three tables below illustrate encodings for different CPH designs to test for the bereavement effect, following the general syntax of CPH table designs recommended in (18). See example description in Material and Methods.

Table 2a: Data structure for Cox Proportional Hazard model that does not estimate the effect for different ages, but instead estimates only widowed vs. non-widowed.

| ID | start | stop                 | event | W | R | C |
|----|-------|----------------------|-------|---|---|---|
| 1  | 0     | 47(age at widowhood) | 0     | 0 | 0 | 3 |
| 1  | 47    | 63(age at death)     | 1     | 1 | 1 | 3 |
| 2  | 0     | 60(age at widowhood) | 0     | 0 | 0 | 6 |
| 2  | 60    | 85(age at death)     | 1     | 1 | 0 | 6 |
| 3  | 0     | 59(age at death)     | 1     | 0 | 0 | 4 |

Table 2b: Data structure for Cox Proportional Hazard model that estimates association between widowhood at given ages and mortality.

| ID | start | stop | event | W <sub>&lt;45</sub> | W <sub>45-54</sub> | W <sub>55-64</sub> | W <sub>65-74</sub> | W <sub>75+</sub> | R | C |
|----|-------|------|-------|---------------------|--------------------|--------------------|--------------------|------------------|---|---|
| 1  | 0     | 47   | 0     | 0                   | 0                  | 0                  | 0                  | 0                | 0 | 3 |
| 1  | 47    | 63   | 1     | 0                   | 1                  | 0                  | 0                  | 0                | 1 | 3 |
| 2  | 0     | 60   | 0     | 0                   | 0                  | 0                  | 0                  | 0                | 0 | 6 |
| 2  | 60    | 85   | 1     | 0                   | 0                  | 1                  | 0                  | 0                | 0 | 6 |
| 3  | 0     | 59   | 1     | 0                   | 0                  | 0                  | 0                  | 0                | 0 | 4 |

Table 2c: Data structure for Cox Proportional Hazard model that estimates association between widowhood with respect to time since bereavement and mortality. Start and Stop columns are in years and Time Since Bereavement (TSB) columns are in months.

| ID              | start | stop | event | TSB <sub>0-6</sub> | TSB <sub>7-12</sub> | TSB <sub>13-24</sub> | TSB <sub>25-36</sub> | TSB <sub>37-48</sub> | TSB <sub>49-60</sub> | TSB <sub>&gt;60</sub> |
|-----------------|-------|------|-------|--------------------|---------------------|----------------------|----------------------|----------------------|----------------------|-----------------------|
| ID <sub>1</sub> | 0     | 47   | 0     | 0                  | 0                   | 0                    | 0                    | 0                    | 0                    | 0                     |
| ID <sub>1</sub> | 47    | 47.5 | 0     | 1                  | 0                   | 0                    | 0                    | 0                    | 0                    | 0                     |
| ID <sub>1</sub> | 47.5  | 48   | 0     | 0                  | 1                   | 0                    | 0                    | 0                    | 0                    | 0                     |
| ID <sub>1</sub> | 48    | 49   | 0     | 0                  | 0                   | 1                    | 0                    | 0                    | 0                    | 0                     |
| ID <sub>1</sub> | 49    | 50   | 0     | 0                  | 0                   | 0                    | 1                    | 0                    | 0                    | 0                     |
| ID <sub>1</sub> | 50    | 51   | 0     | 0                  | 0                   | 0                    | 0                    | 1                    | 0                    | 0                     |
| ID <sub>1</sub> | 51    | 52   | 0     | 0                  | 0                   | 0                    | 0                    | 0                    | 1                    | 0                     |

1  
2  
3  
4  
5  
6  
7  
8  
9  
10  
11  
12  
13  
14  
15  
16  
17  
18  
19  
20  
21  
22  
23  
24  
25  
26  
27  
28  
29  
30  
31  
32  
33  
34  
35  
36  
37  
38  
39  
40  
41  
42  
43  
44  
45  
46  
47  
48  
49  
50  
51  
52  
53  
54  
55  
56  
57  
58  
59  
60

|                 |      |      |   |   |   |   |   |   |   |   |
|-----------------|------|------|---|---|---|---|---|---|---|---|
| ID <sub>1</sub> | 52   | 63   | 1 | 0 | 0 | 0 | 0 | 0 | 0 | 1 |
| ID <sub>2</sub> | 0    | 60   | 0 | 0 | 0 | 0 | 0 | 0 | 0 | 0 |
| ID <sub>2</sub> | 60   | 60.5 | 0 | 1 | 0 | 0 | 0 | 0 | 0 | 0 |
| ID <sub>2</sub> | 60.5 | 61   | 0 | 0 | 1 | 0 | 0 | 0 | 0 | 0 |
| ID <sub>2</sub> | 61   | 62   | 0 | 0 | 0 | 1 | 0 | 0 | 0 | 0 |
| ID <sub>2</sub> | 62   | 63   | 0 | 0 | 0 | 0 | 1 | 0 | 0 | 0 |
| ID <sub>2</sub> | 63   | 64   | 0 | 0 | 0 | 0 | 0 | 1 | 0 | 0 |
| ID <sub>2</sub> | 64   | 65   | 0 | 0 | 0 | 0 | 0 | 0 | 1 | 0 |
| ID <sub>2</sub> | 65   | 85   | 1 | 0 | 0 | 0 | 0 | 0 | 0 | 1 |
| ID <sub>3</sub> | 0    | 59   | 1 | 0 | 0 | 0 | 0 | 0 | 0 | 0 |

For peer review only

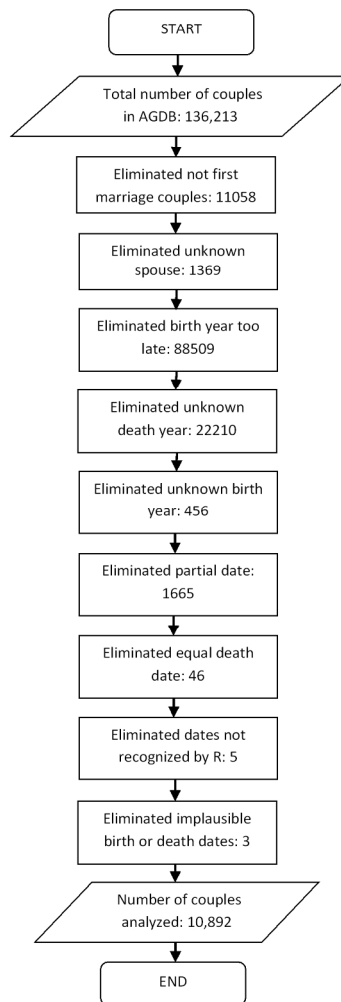

173x236mm (300 x 300 DPI)

1  
2  
3  
4  
5  
6  
7  
8  
9  
10  
11  
12  
13  
14  
15  
16  
17  
18  
19  
20  
21  
22  
23  
24  
25  
26  
27  
28  
29  
30  
31  
32  
33  
34  
35  
36  
37  
38  
39  
40  
41  
42  
43  
44  
45  
46  
47  
48  
49  
50  
51  
52  
53  
54  
55  
56  
57  
58  
59  
60

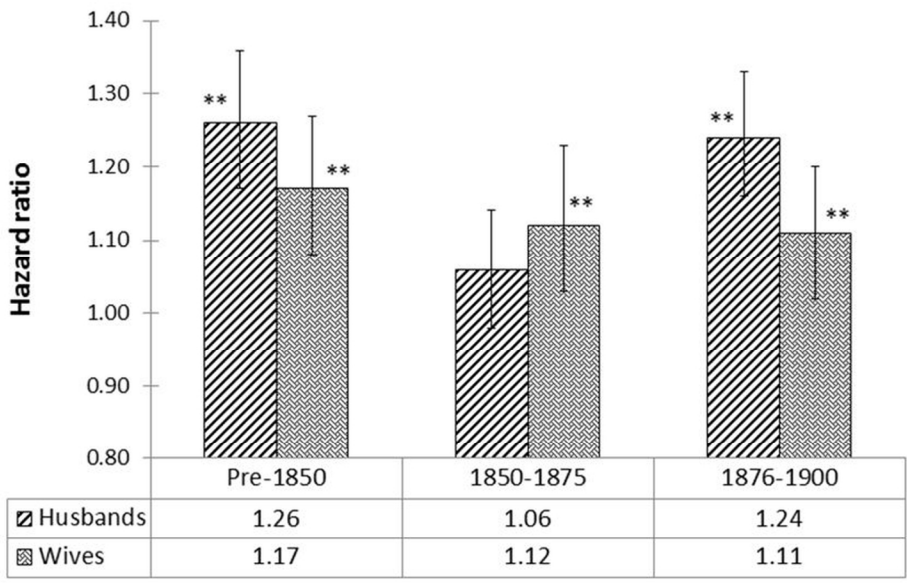

137x90mm (300 x 300 DPI)

Review only



1  
2  
3  
4  
5  
6  
7  
8  
9  
10  
11  
12  
13  
14  
15  
16  
17  
18  
19  
20  
21  
22  
23  
24  
25  
26  
27  
28  
29  
30  
31  
32  
33  
34  
35  
36  
37  
38  
39  
40  
41  
42  
43  
44  
45  
46  
47  
48  
49  
50  
51  
52  
53  
54  
55  
56  
57  
58  
59  
60

**Cohort: Pre-1850**

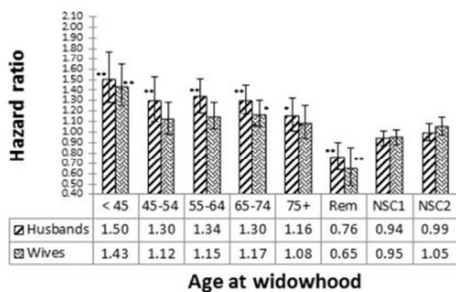

**Cohort: 1850-1875**

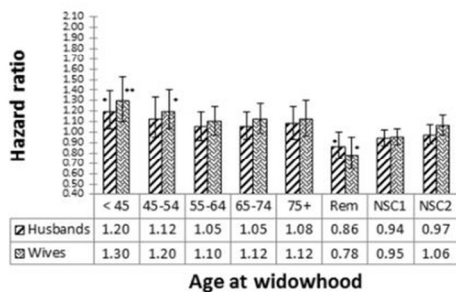

**Cohort: 1876-1900**

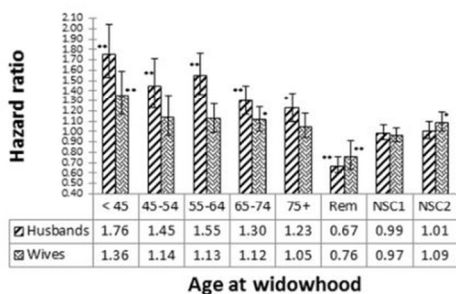

123x90mm (300 x 300 DPI)

View only

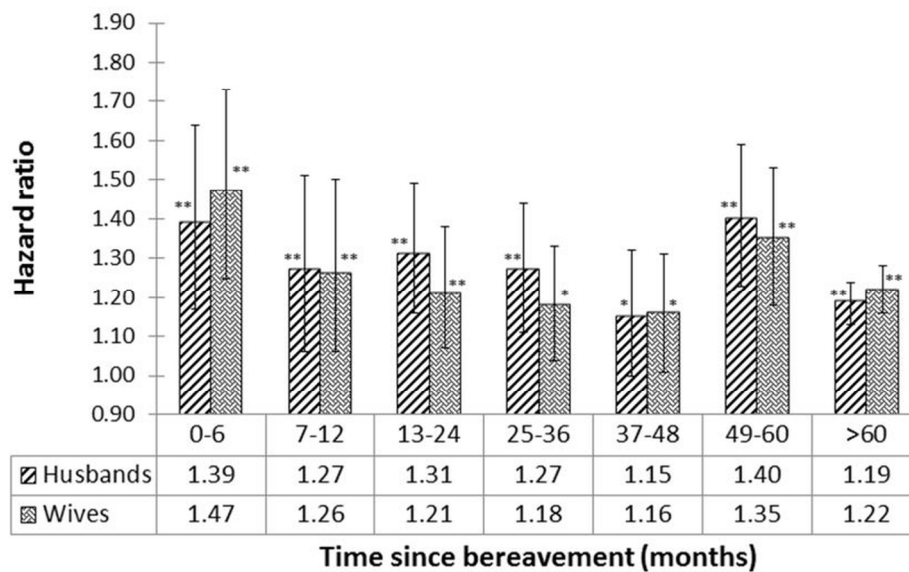

Figure 4. Hazard ratios of widowed husbands and wives versus their married counterparts according to time since bereavement (months) (design provided in Table 2c); \* and \*\* on the top of the blocks represent significance of hazard ratios with p-value < 0.05 and p-value < 0.001, respectively.

149x90mm (300 x 300 DPI)

Table S1: Wald statistics associated with models that are used to study the association between widowhood and mortality.

| Cohorts                 | Pre-1850           | 1850-1875        | 1876-1900          |
|-------------------------|--------------------|------------------|--------------------|
| Husbands                | 38.2 <sup>**</sup> | 5.9 <sup>*</sup> | 38.0 <sup>**</sup> |
| Wives                   | 15.2 <sup>**</sup> | 6.9 <sup>*</sup> | 6.8 <sup>*</sup>   |
| * P<0.05 and ** P<0.001 |                    |                  |                    |

Table S2: Wald statistics associated with models that are used to study the association between timing of widowhood and mortality.

| Cohorts                 | Pre-1850           | 1850-1875          | 1876-1900          |
|-------------------------|--------------------|--------------------|--------------------|
| Husbands                | 57.2 <sup>**</sup> | 15.8 <sup>*</sup>  | 87.7 <sup>**</sup> |
| Wives                   | 39.8 <sup>**</sup> | 20.3 <sup>**</sup> | 28.9 <sup>**</sup> |
| * P<0.05 and ** P<0.001 |                    |                    |                    |

Table S3: Wald statistics associated with models that are used to study the association between time since bereavement and mortality.

|            |                    |
|------------|--------------------|
| Husbands   | 94.6 <sup>**</sup> |
| Wives      | 84.3 <sup>**</sup> |
| ** P<0.001 |                    |
