# Supplementary material for: Analysis of the bereavement effect after the death of a spouse in the Amish: a population-based retrospective cohort study
Source: HighWire-hosted journal article supplement (doi:10.1136/bmjopen-2013-003670), 2014-01-01
Supplement: bmjopen-2013-003670supp.pdf [file bmjopen-2013-003670supp.pdf]

Table S1: Wald statistics associated with models that are used to study the association between widowhood and mortality.

| Cohorts                 | Pre-1850           | 1850-1875        | 1876-1900          |
|-------------------------|--------------------|------------------|--------------------|
| Husbands                | 38.2 <sup>**</sup> | 5.9 <sup>*</sup> | 38.0 <sup>**</sup> |
| Wives                   | 15.2 <sup>**</sup> | 6.9 <sup>*</sup> | 6.8 <sup>*</sup>   |
| * P<0.05 and ** P<0.001 |                    |                  |                    |

Table S2: Wald statistics associated with models that are used to study the association between timing of widowhood and mortality.

| Cohorts                 | Pre-1850           | 1850-1875          | 1876-1900          |
|-------------------------|--------------------|--------------------|--------------------|
| Husbands                | 57.2 <sup>**</sup> | 15.8 <sup>*</sup>  | 87.7 <sup>**</sup> |
| Wives                   | 39.8 <sup>**</sup> | 20.3 <sup>**</sup> | 28.9 <sup>**</sup> |
| * P<0.05 and ** P<0.001 |                    |                    |                    |

Table S3: Wald statistics associated with models that are used to study the association between time since bereavement and mortality.

|            |                    |
|------------|--------------------|
| Husbands   | 94.6 <sup>**</sup> |
| Wives      | 84.3 <sup>**</sup> |
| ** P<0.001 |                    |
